# Supplementary material for: Integrating genetically predicted transcriptomic signatures with longitudinal real-world data enables scalable drug repurposing for Alzheimer’s disease
Source: Research Square preprint supplement (doi:10.21203/rs.3.rs-9518587/v1), 2026-05-15
Supplement: Supplementary file 1 [file 750dfc51ae8f600049b5a1b5.pdf]

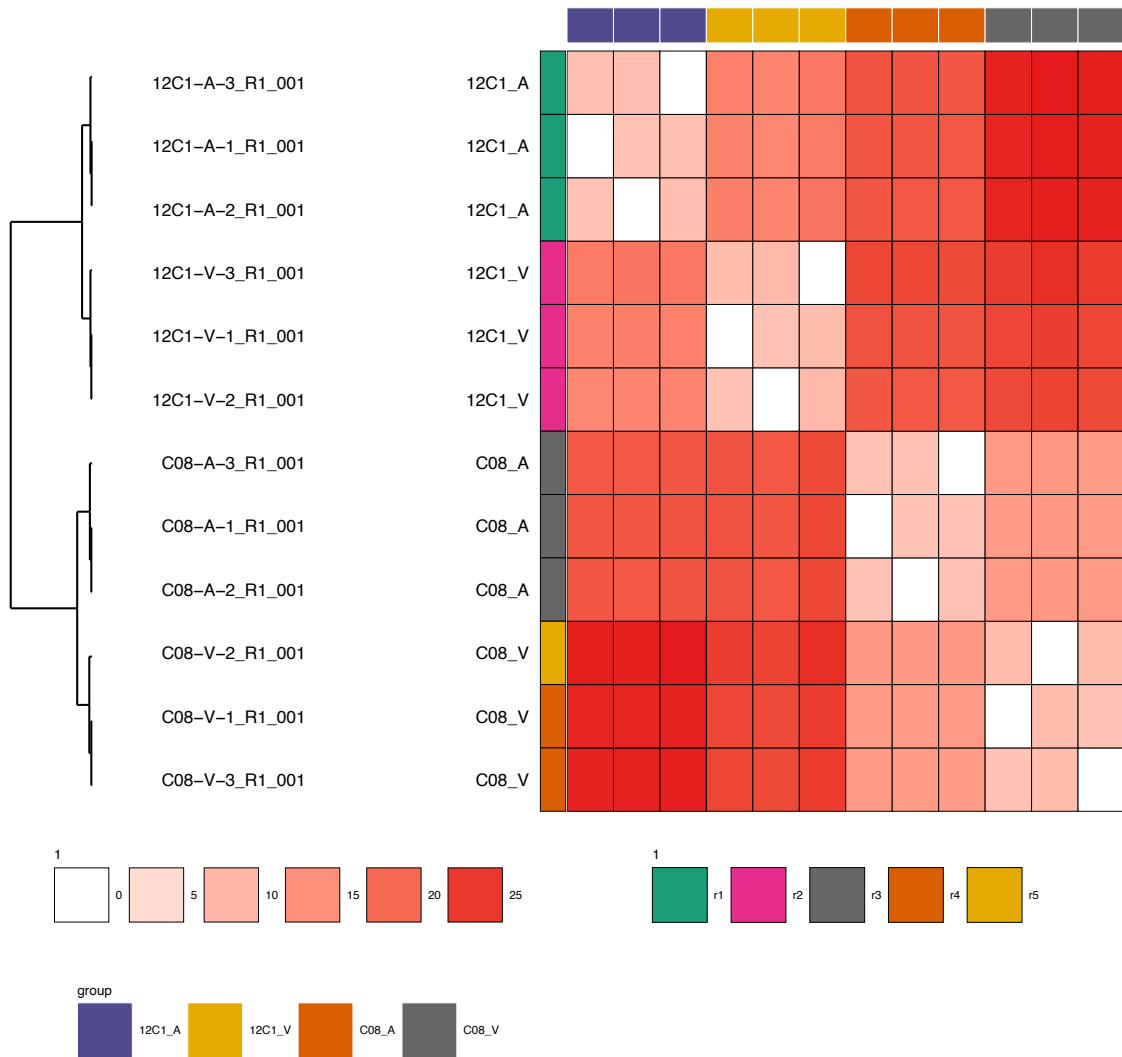

**Supplementary Fig. 2. Heatmap of pairwise sample correlations for RNA-seq quality control.**

Replicates cluster cleanly by their assigned labels, indicating data quality consistent with expectations.

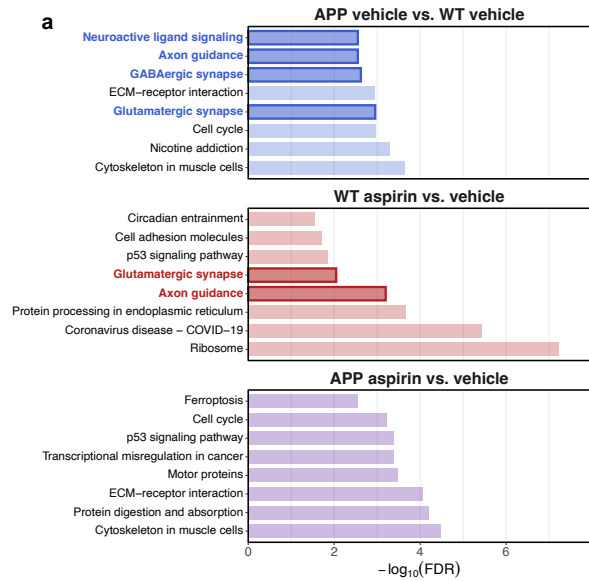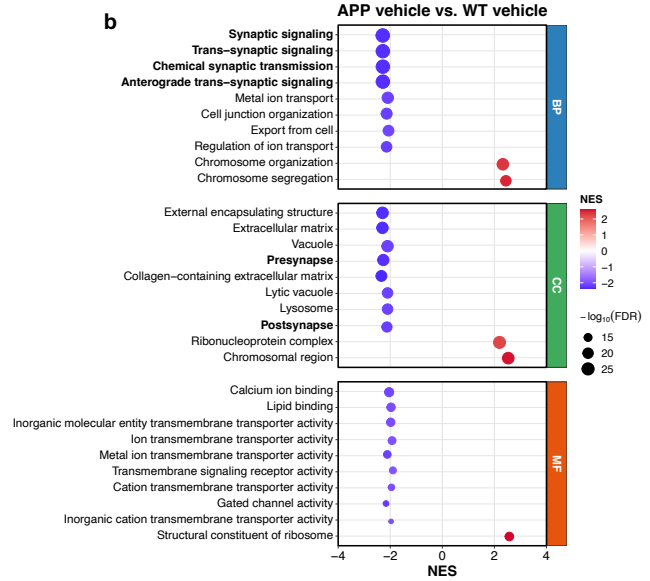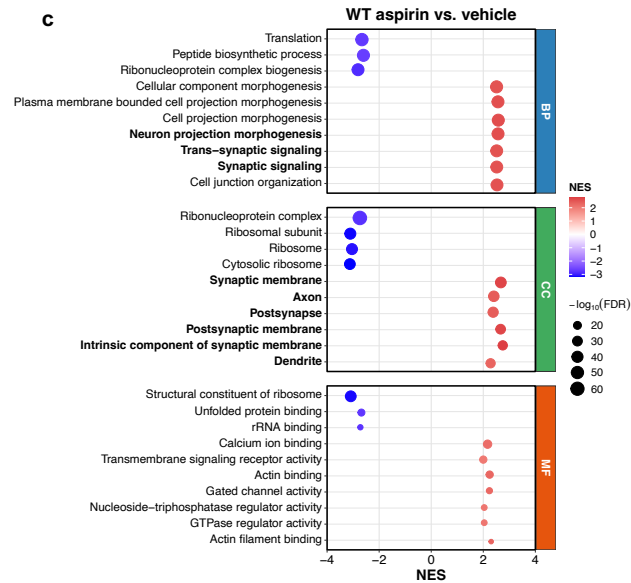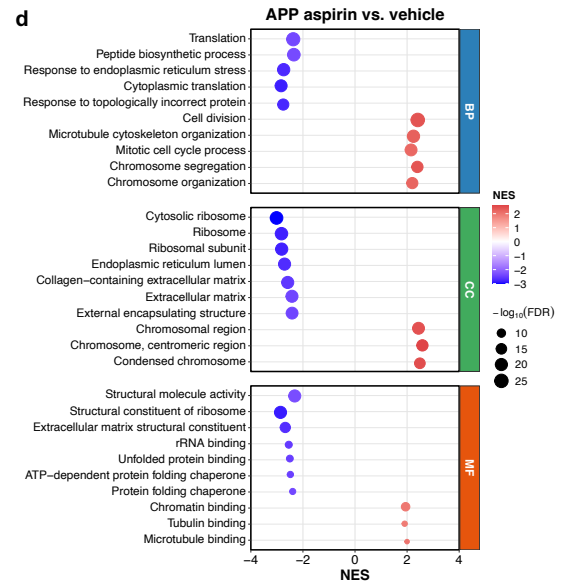

**Supplementary Fig. 3. KEGG and Gene Ontology (GO) enrichment analyses.** **a)** KEGG over-representation analysis of differentially expressed genes for three contrasts: baseline APP mutation signature (APP vehicle vs. WT vehicle), aspirin effect in WT (WT aspirin vs. vehicle), and aspirin effect in APP (APP aspirin vs. vehicle). Bar length indicates significance as  $-\log_{10}$  false discovery rate (FDR). Synapse, axon, and neuronal signaling pathways are bolded and outlined. **b-d)** GO gene set enrichment analysis (GSEA) for the same three contrasts, showing the top ten enriched terms within biological process (BP), cellular component (CC), and molecular function (MF). The x-axis shows normalized enrichment score (NES). Bubble size is proportional to  $-\log_{10}(\text{FDR})$ ; bubble color reflects NES (red, positive; blue, negative).

# Synapse pathways

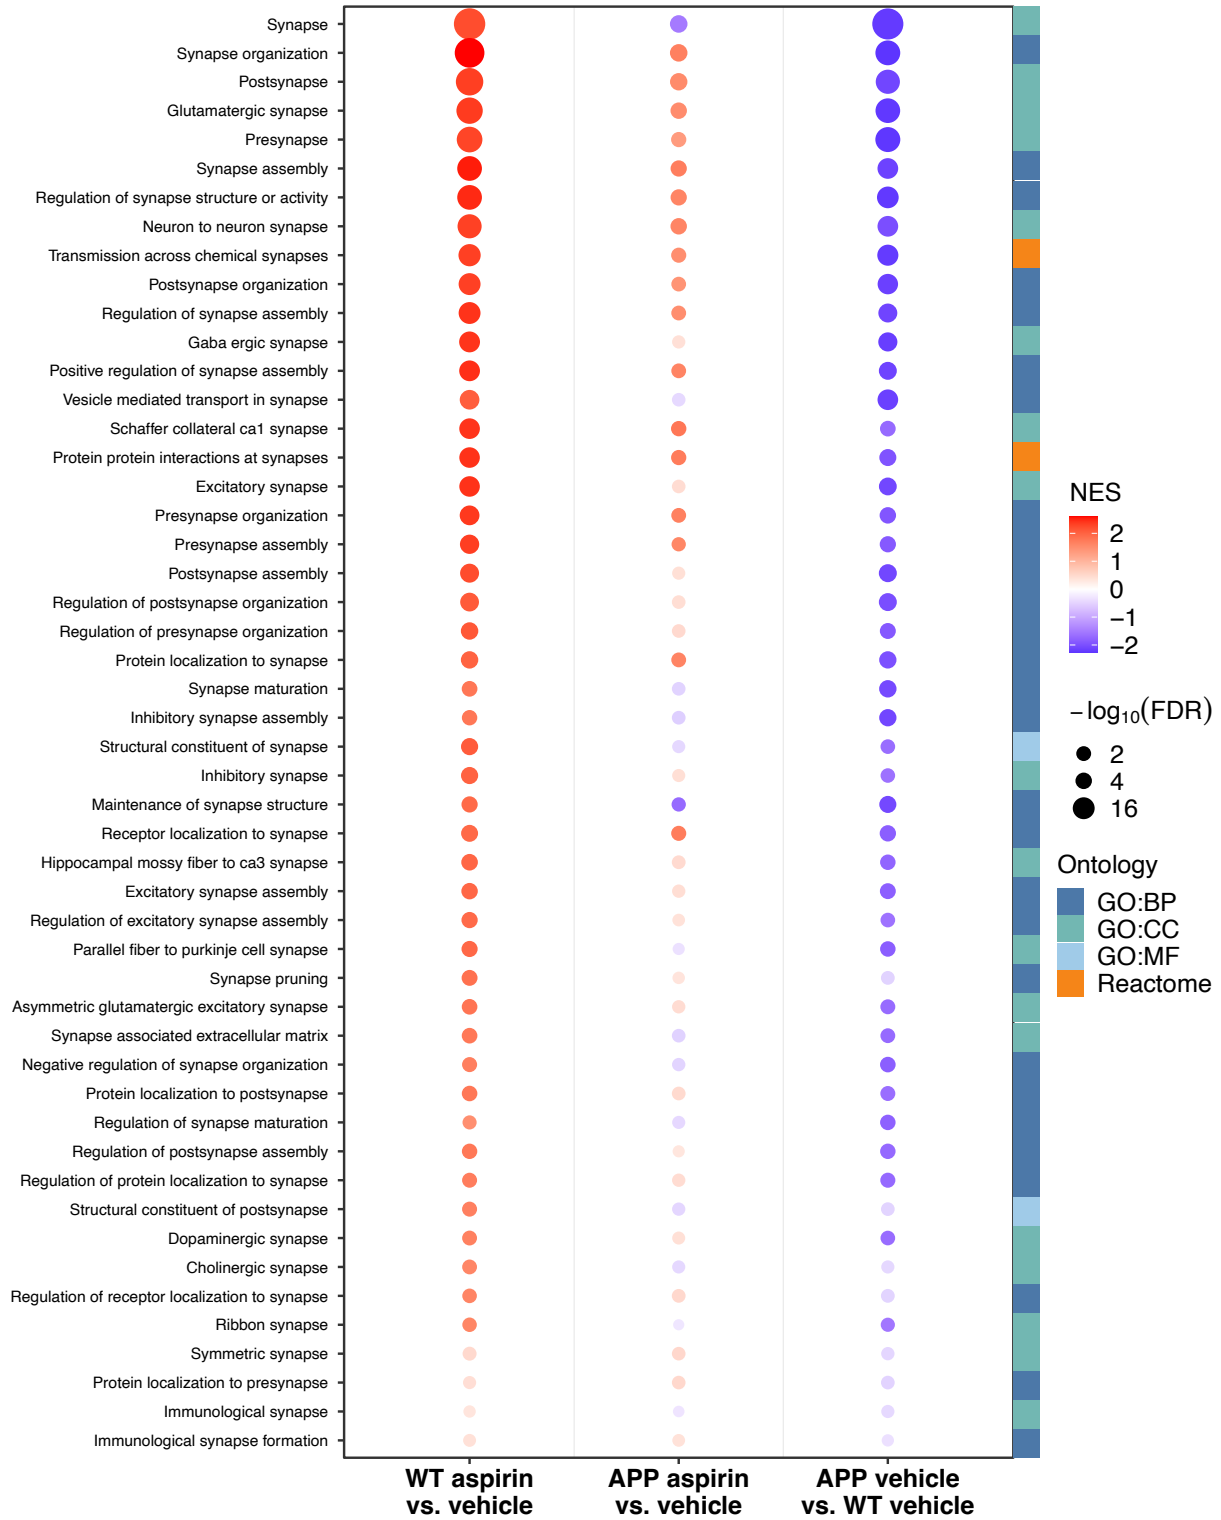

**Supplementary Fig. 4. Synapse-related pathway enrichment.** Bubble plots show GSEA results for synapse-related MSigDB gene sets across WT aspirin vs. vehicle, APP aspirin vs. vehicle, and APP vehicle vs. WT vehicle contrasts. Bubbles are colored by normalized enrichment score (NES; red indicates positive enrichment, blue indicates negative enrichment) and bubble size denotes statistical significance ( $-\log_{10}\text{FDR}$ ). Pathways with  $\text{FDR} < 0.05$  are shown with opaque bubbles; pathways with  $\text{FDR} \geq 0.05$  are shown with transparent bubbles.

## Axon pathways

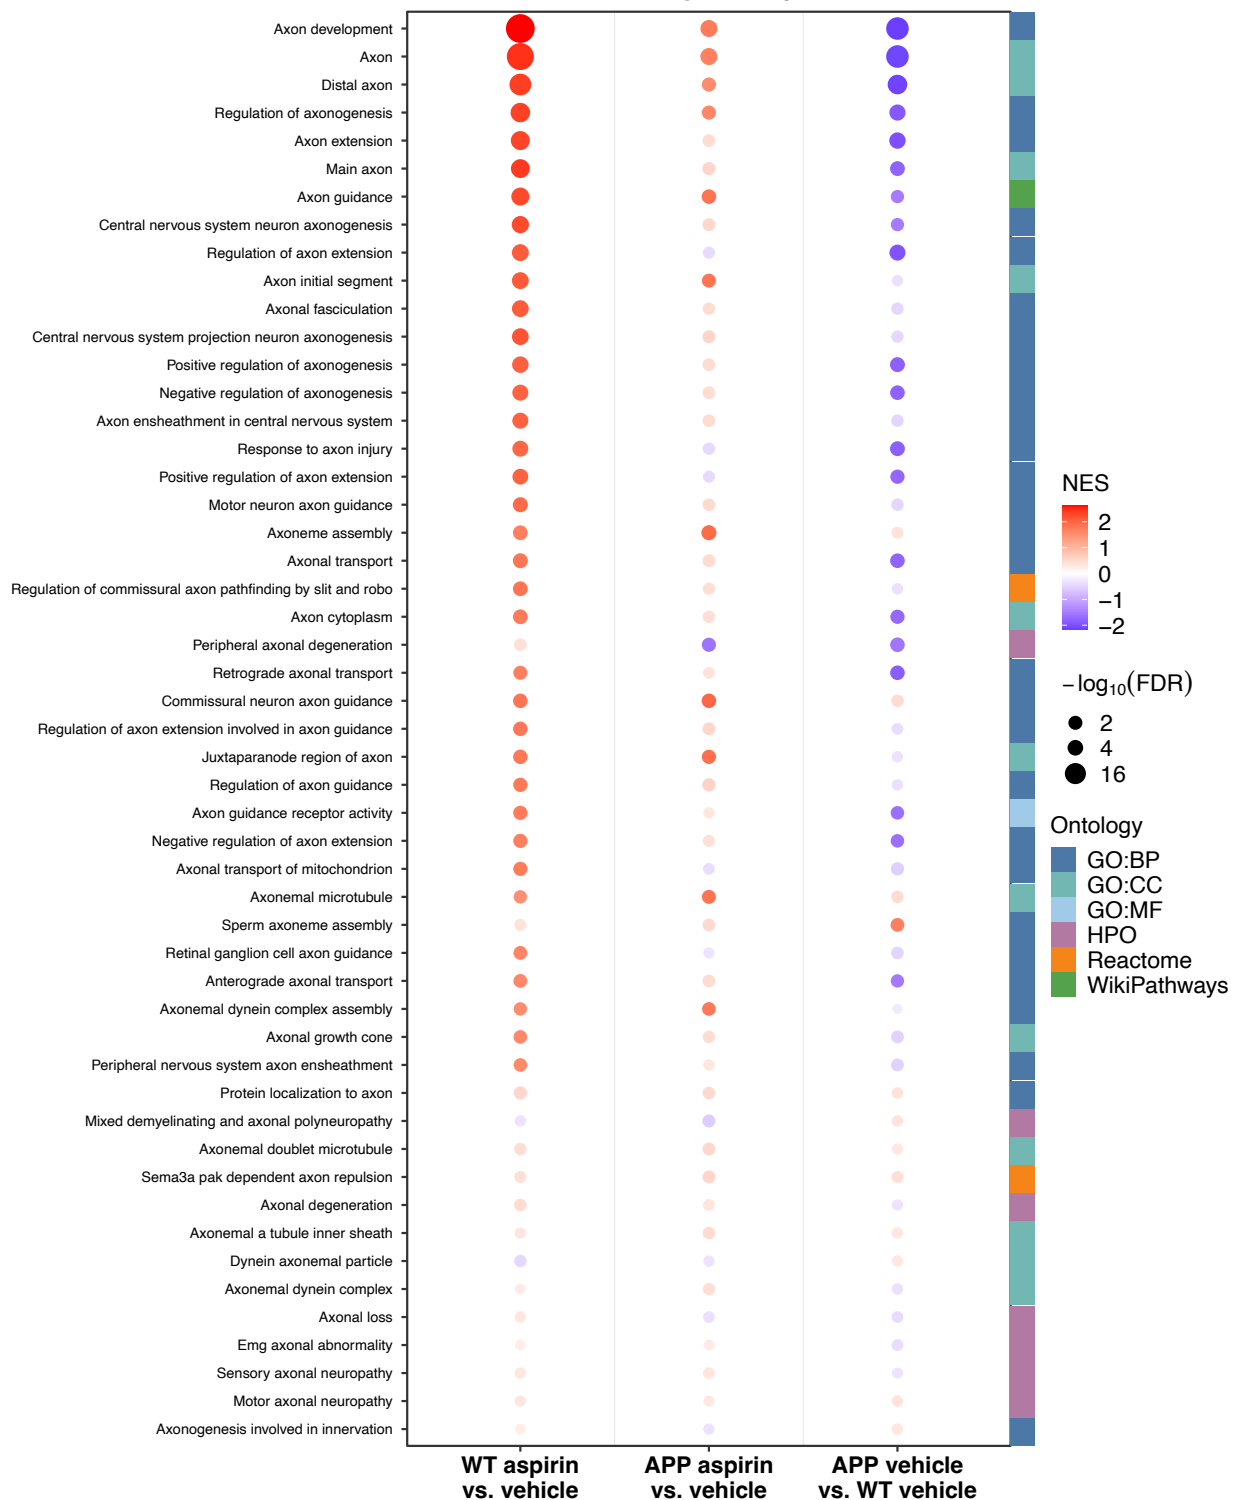

**Supplementary Fig. 5. Axon-related pathway enrichment.** Bubble plots show GSEA results for axon-related MSigDB gene sets across WT aspirin vs. vehicle, APP aspirin vs. vehicle, and APP vehicle vs. WT vehicle contrasts. Bubbles are colored by normalized enrichment score (NES; red indicates positive enrichment, blue indicates negative enrichment) and bubble size denotes statistical significance ( $-\log_{10}\text{FDR}$ ). Pathways with  $\text{FDR} < 0.05$  are shown with opaque bubbles; pathways with  $\text{FDR} \geq 0.05$  are shown with transparent bubbles.

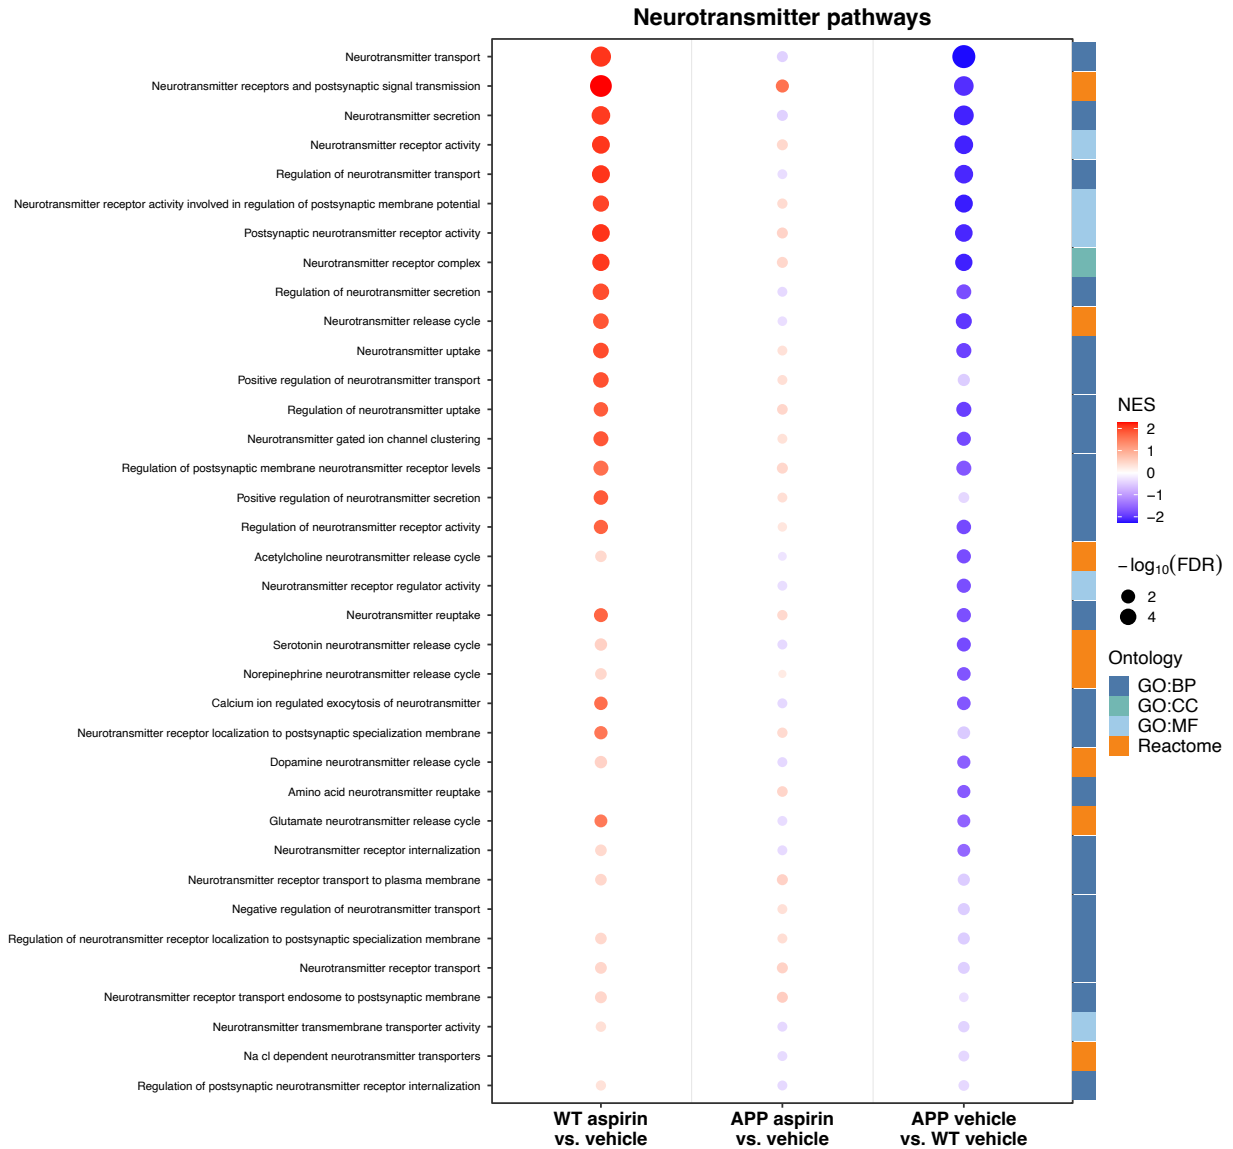

**Supplementary Fig. 6. Neurotransmitter-related pathway enrichment.** Bubble plots show GSEA results for neurotransmitter-related MSigDB gene sets across WT aspirin vs. vehicle, APP aspirin vs. vehicle, and APP vehicle vs. WT vehicle contrasts. Bubbles are colored by normalized enrichment score (NES; red indicates positive enrichment, blue indicates negative enrichment) and bubble size denotes statistical significance ( $-\log_{10}(\text{FDR})$ ). Pathways with  $\text{FDR} < 0.05$  are shown with opaque bubbles; pathways with  $\text{FDR} \geq 0.05$  are shown with transparent bubbles.



**Supplementary Fig. 7. Tissue-specific S-PrediXcan results.** Heatmap of S-PrediXcan  $Z$ -scores across GTEx tissues for genes significant in more than one tissue. Rows indicate genes and columns indicate tissues. Color denotes  $Z$ -score magnitude and direction ( $Z > 0$ : higher genetically predicted expression associated with increased AD risk;  $Z < 0$ : higher genetically predicted expression associated with decreased AD risk). The rightmost “Average” column reports each gene’s mean  $Z$ -score across tissues with non-missing estimates.

**Supplementary Table 1. AD-associated genes represented in TWAS-derived transcriptomic signatures and supporting evidence.**

| <b>Gene</b>                  | <b>Evidence type</b>              | <b>References</b> |
|------------------------------|-----------------------------------|-------------------|
| <i>ABCA7</i>                 | GWAS locus                        | 1,2               |
| <i>CD2AP</i>                 | GWAS locus, TWAS risk gene        | 1–5               |
| <i>CD33</i>                  | GWAS locus; TWAS risk gene        | 1–3,6             |
| <i>HLA-DQA1</i> <sup>†</sup> | GWAS locus                        | 7                 |
| <i>HLA-DRB1</i> <sup>†</sup> | GWAS locus                        | 1,2               |
| <i>MS4A4A</i>                | GWAS locus; TWAS risk gene        | 3,6,8             |
| <i>MS4A6A</i>                | GWAS locus; TWAS risk gene        | 1,2,6             |
| <i>PICALM</i>                | GWAS locus; TWAS risk gene        | 1–4,6,9           |
| <i>ACE</i>                   | TWAS risk gene                    | 4,10              |
| <i>APOC1</i>                 | TWAS risk gene                    | 5                 |
| <i>BIN1</i>                  | GWAS locus; TWAS risk gene        | 1–3,6,8,9         |
| <i>HLA-DQA2</i> <sup>†</sup> | TWAS risk gene                    | 11                |
| <i>PVR</i>                   | TWAS risk gene                    | 6,8,11            |
| <i>TOMM40</i>                | TWAS risk gene                    | 6,11,12           |
| <i>DMWD</i>                  | TWAS risk gene                    | 6,11              |
| <i>HLA-DRB5</i> <sup>†</sup> | GWAS locus                        | 1                 |
| <i>ADAM10</i>                | GWAS locus                        | 2                 |
| <i>HLA-DRA</i> <sup>†</sup>  | Gene-based GWAS association       | 2                 |
| <i>HLA-DQB2</i> <sup>†</sup> | Candidate risk gene at GWAS locus | 1,13              |
| <i>CLU</i>                   | GWAS locus; TWAS risk gene        | 1–3,6             |
| <i>IRF2BP1</i>               | TWAS risk gene                    | 11                |
| <i>CLPTM1</i>                | TWAS risk gene                    | 6,11              |
| <i>TREM2</i>                 | GWAS locus; TWAS risk gene        | 2,5               |
| <i>APOE</i>                  | GWAS locus; TWAS risk gene        | 1,2,8,9,11        |
| <i>CRI</i>                   | GWAS locus; TWAS risk gene        | 1–3,6,11          |
| <i>PTK2B</i>                 | GWAS locus; TWAS risk gene        | 1,2,6,8           |

<sup>†</sup> Due to high linkage disequilibrium in the HLA region, locus-level associations cannot reliably be resolved to a single causal gene.

**Supplementary Table 2. Characteristics of matched patient cohort for MarketScan claims data case-control study.**

| Clinical characteristics                 | MarketScan<br>(N = 248,961) |                 |
|------------------------------------------|-----------------------------|-----------------|
|                                          | Case (AD)                   | Control (no AD) |
| <b>AD status</b>                         |                             |                 |
| <i>N</i>                                 | 82,987                      | 165,974         |
| <b>Mean age at last follow-up (s.d.)</b> | 85.6<br>(7.1)               | 84.2<br>(7.2)   |
| <b>Sex (%)</b>                           |                             |                 |
| Female                                   | 65.1                        | 65.1            |
| Male                                     | 34.9                        | 34.9            |
| <b>Comorbidities (%)</b>                 |                             |                 |
| Cardiovascular disease                   | 52.1                        | 46.6            |
| Cerebrovascular disease                  | 35.9                        | 26.7            |
| Rheumatoid arthritis                     | 3.4                         | 3.9             |

**Supplementary Table 3. AD outcomes in VUMC, *All of Us*, and MarketScan datasets.**

| <b>Clinical characteristics</b>                       | <b>VUMC</b><br>( <i>N</i> = 19,413) |                  | <i>All of Us</i><br>( <i>N</i> = 1,995) |                  | <b>MarketScan</b><br>( <i>N</i> = 248,961) |                  |
|-------------------------------------------------------|-------------------------------------|------------------|-----------------------------------------|------------------|--------------------------------------------|------------------|
|                                                       | <b>Exposed</b>                      | <b>Unexposed</b> | <b>Exposed</b>                          | <b>Unexposed</b> | <b>Exposed</b>                             | <b>Unexposed</b> |
| <b>Aspirin</b>                                        |                                     |                  |                                         |                  |                                            |                  |
| <b>AD diagnoses (<i>N</i>)</b>                        | 152                                 | 387              | –                                       | –                | 196                                        | 82,791           |
| <b>Mean age of AD diagnosis among AD cases (s.d.)</b> | 76.1<br>(3.9)                       | 76.7<br>(4.0)    | 76.0<br>(2.2)                           | 76.8<br>(2.7)    | 85.6<br>(7.2)                              | 84.2<br>(7.2)    |

\*Participant counts for the NIH *All of Us* Research Program data are not reported if between 1 and 20, in compliance with data privacy and reporting restrictions set by *All of Us*.

## Supplementary References

1. Lambert, J.-C. *et al.* Meta-analysis of 74,046 individuals identifies 11 new susceptibility loci for Alzheimer's disease. *Nat Genet* **45**, 1452–1458 (2013).
2. Jansen, I. E. *et al.* Genome-wide meta-analysis identifies new loci and functional pathways influencing Alzheimer's disease risk. *Nat Genet* **51**, 404–413 (2019).
3. Naj, A. C. *et al.* Common variants at MS4A4/MS4A6E, CD2AP, CD33 and EPHA1 are associated with late-onset Alzheimer's disease. *Nat Genet* **43**, 436–441 (2011).
4. Sun, Y. *et al.* A transcriptome-wide association study identifies novel blood-based gene biomarker candidates for Alzheimer's disease risk. *Hum Mol Genet* **31**, 289–299 (2021).
5. Gockley, J. *et al.* Multi-tissue neocortical transcriptome-wide association study implicates 8 genes across 6 genomic loci in Alzheimer's disease. *Genome Med* **13**, 76 (2021).
6. Hao, S., Wang, R., Zhang, Y. & Zhan, H. Prediction of Alzheimer's Disease-Associated Genes by Integration of GWAS Summary Data and Expression Data. *Front Genet* **9**, 653 (2019).
7. Bellenguez, C. *et al.* New insights into the genetic etiology of Alzheimer's disease and related dementias. *Nat Genet* **54**, 412–436 (2022).
8. Harwood, J. C. *et al.* Defining functional variants associated with Alzheimer's disease in the induced immune response. *Brain Commun* **3**, fcab083 (2021).
9. Sun, N. *et al.* Human microglial state dynamics in Alzheimer's disease progression. *Cell* **186**, 4386–4403.e29 (2023).
10. Sun, Y. *et al.* A transcriptome-wide association study of Alzheimer's disease using prediction models of relevant tissues identifies novel candidate susceptibility genes. *Genome Med* **13**, 141 (2021).

11. Gerring, Z. F., Lupton, M. K., Edey, D., Gamazon, E. R. & Derks, E. M. An analysis of genetically regulated gene expression across multiple tissues implicates novel gene candidates in Alzheimer's disease. *Alzheimer's Research & Therapy* **12**, 43 (2020).
12. Tang, S. *et al.* Novel Variance-Component TWAS method for studying complex human diseases with applications to Alzheimer's dementia. *PLOS Genetics* **17**, e1009482 (2021).
13. Zhang, X. *et al.* Regulation of the Late Onset alzheimer's Disease Associated HLA-DQA1/DRB1 Expression. *Am J Alzheimers Dis Other Demen* **37**, 15333175221085066 (2022).
