# Supplementary material for: Integrating genetically predicted transcriptomic signatures with longitudinal real-world data enables scalable drug repurposing for Alzheimer’s disease
Source: Research Square preprint supplement (doi:10.21203/rs.3.rs-9518587/v1), 2026-05-15
Supplement: Supplementary file 1 [file d36d089541122707b656e0e8.xlsx]

## Sheet: Contents
Contents
Sheet 1	S-MultiXcan results using GTEx data: brain tissues
Sheet 2	S-MultiXcan results using GTEx data: AD-relevant tissues
Sheet 3	S-MultiXcan results using GTEx data: all tissues
Sheet 4	GBJ results using MiGA data
Sheet 5	Drugs with negative CMap connectivity to the brain tissue GTEx signature
Sheet 6	Drugs with negative CMap connectivity to the AD-relevant tissue GTEx signature
Sheet 7	Drugs with negative CMap connectivity to the all-tissue GTEx signature
Sheet 8	Drugs with negative CMap connectivity to the microglial signature
Sheet 9	Mapping statistics of RNAseq experiment
Sheet 10	GSEA results: APP vehicle vs. WT vehicle
Sheet 11	GSEA results: WT aspirin vs. vehicle
Sheet 12	GSEA results: APP aspirin vs. vehicle
Sheet 13	RRHO discordant hotspot pathway enrichment
Sheet 14	Cardiovascular disease ICD codes
Sheet 15	Cerebrovascular disease ICD codes
Sheet 16	Rheumatoid arthritis ICD codes
Sheet 17	ICD codes used to exclude non-AD dementia

## Sheet: Sheet 1
S-MultiXcan results using GTEx data: brain tissues
gene_name	ensembl_gene_id	smultixcan_pvalue	n	n_indep	n_pos_dir	n_neg_dir	consensus	z_mean	z_sd	z_concordant_mean	BrainAmygdala	BrainAnteriorcingulatecortexBA24	BrainCaudatebasalganglia	BrainCerebellarHemisphere	BrainCerebellum	BrainCortex	BrainFrontalCortexBA9	BrainHippocampus	BrainHypothalamus	BrainNucleusaccumbensbasalganglia	BrainPutamenbasalganglia	BrainSpinalcordcervicalc1	BrainSubstantianigra	p_i_best	t_i_best	p_i_worst	t_i_worst	eigen_max	eigen_min	eigen_min_kept	z_min	z_max	tmi
APOE	ENSG00000130203.9	0	8	3	7	1	+	20.8181	23.6444	28.5574	32.2064	32.2064	6.66307	NA	NA	NA	-33.3565	32.2064	NA	32.2064	32.2064	NA	32.2064	5.8601887568374e-244	Brain_Frontal_Cortex_BA9	2.68158520945578e-11	Brain_Caudate_basal_ganglia	6.64808	2.89480045038095e-18	0.370482	-33.3565	32.2064	3
NECTIN2	ENSG00000130202.9	0	8	5	2	6	-	-5.13571	17.1737	-13.2426	NA	NA	-14.7005	19.1848	NA	NA	-5.34584	-31.4154	NA	-14.7005	19.1848	-5.34584	-7.94724	1.24669417707619e-216	Brain_Hippocampus	8.99994065417825e-08	Brain_Spinal_cord_cervical_c-1	2.98686	1.2090429089372e-17	0.414308	-31.4154	19.1848	5
APOC4	ENSG00000267467.3	1.372320845878e-302	4	2	3	1	+	2.11874	24.1198	14.1786	14.1786	NA	14.1786	NA	NA	NA	NA	NA	NA	-34.061	NA	14.1786	NA	2.79329241809694e-254	Brain_Nucleus_accumbens_basal_ganglia	1.24235250276151e-45	Brain_Amygdala	3.00124	1.09999112047488e-16	0.998759	-34.061	14.1786	2
APOC1	ENSG00000130208.9	1.9137579529449e-299	3	2	1	2	-	-11.3537	20.7633	-20.362	NA	-6.66307	NA	NA	NA	NA	NA	NA	NA	-34.061	NA	6.66307	NA	2.79329241809853e-254	Brain_Nucleus_accumbens_basal_ganglia	2.68158520945578e-11	Brain_Anterior_cingulate_cortex_BA24	2.09219	1.56106452360965e-16	0.907809	-34.061	6.66307	2
TOMM40	ENSG00000130204.12	9.83179360561813e-193	12	2	1	11	-	-0.416068	9.46823	-3.14931	-3.14931	-3.14931	-3.14931	-3.14931	-3.14931	29.6496	-3.14931	-3.14931	-3.14931	-3.14931	-3.14931	NA	-3.14931	3.43253566535566e-193	Brain_Cortex	0.00163656	Brain_Anterior_cingulate_cortex_BA24	11.036	3.79175330631864e-31	0.963962	-3.14931	29.6496	2
ZNF296	ENSG00000170684.8	6.83130473223249e-79	11	5	1	10	-	-6.36002	4.57865	-7.2691	-6.76819	-2.82714	NA	2.73082	NA	-6.73421	-6.90983	-6.99513	-16.9362	-6.7065	-5.27006	-6.77559	-6.76819	2.43332479715524e-64	Brain_Hypothalamus	0.00631767	Brain_Cerebellar_Hemisphere	7.35136	7.44432668286175e-17	0.538637	-16.9362	2.73082	5
CEACAM19	ENSG00000186567.12	8.19366579470128e-58	13	2	13	0	+	15.5965	0.525673	15.5965	15.8026	15.7637	15.5901	15.5252	14.4895	14.5446	15.7637	15.7637	15.7637	15.7637	15.7637	15.7637	16.4572	7.4443048165223e-61	Brain_Substantia_nigra	1.41131125272734e-47	Brain_Cerebellum	12.1711	5.67638484046307e-19	0.488755	14.4895	16.4572	2
TRAPPC6A	ENSG00000007255.10	7.30551115045392e-40	9	3	0	9	-	-3.74151	5.11215	-3.74151	NA	NA	-0.436061	-0.436061	NA	-13.2281	-0.436061	-0.436061	-0.436061	-0.436061	-8.91456	-8.91456	NA	6.03865673754001e-40	Brain_Cortex	0.662792	Brain_Caudate_basal_ganglia	5.13294	1.47469389795501e-32	1.09492	-13.2281	-0.436061	3
BIN1	ENSG00000136717.14	6.9936113001625e-38	13	5	1	12	-	-4.46816	3.49319	-4.90528	-0.467716	-5.4997	-4.66597	-8.10425	-9.1614	-7.97181	-6.5872	-0.963688	-4.19773	-2.24209	0.777174	-8.53093	-0.470823	5.12299142911591e-20	Brain_Cerebellum	0.639987	Brain_Amygdala	6.92144	2.62155648032458e-17	0.278531	-9.1614	0.777174	5
APOC2	ENSG00000234906.9	1.07222655058055e-37	13	3	12	1	+	6.19424	3.60174	6.82775	5.15761	3.57424	8.8772	11.4771	5.20578	7.60711	9.5414	3.57424	3.25681	7.24681	11.0314	-1.40782	5.38322	1.72007745048056e-30	Brain_Cerebellar_Hemisphere	0.159185	Brain_Spinal_cord_cervical_c-1	11.0015	3.00793193861381e-17	0.442898	-1.40782	11.4771	3
CLPTM1	ENSG00000104853.15	3.18639174194348e-36	12	3	6	6	NA	0.463772	6.02662	NA	11.3096	11.3096	0.172947	-2.85933	-7.75926	1.06396	-3.40742	-1.06386	4.18452	1.04816	NA	-6.43416	-1.9994	1.17680956695638e-29	Brain_Amygdala	0.862693	Brain_Caudate_basal_ganglia	8.43748	4.62763036265851e-17	1.18246	-7.75926	11.3096	3
PVR	ENSG00000073008.14	8.82632087307986e-27	12	2	0	12	-	-8.04638	2.05558	-8.04638	-6.04244	-6.1974	-8.8995	NA	-7.8081	-11.2772	-8.419	-5.90996	-6.27937	-7.76728	-10.7807	-6.15305	-11.0225	1.70044065849838e-29	Brain_Cortex	3.42201116706105e-09	Brain_Hippocampus	10.7297	3.22352129331714e-17	0.50281	-11.2772	-5.90996	2
MS4A6A	ENSG00000110077.14	3.24479433111508e-26	2	2	2	0	+	7.23025	4.50109	7.23025	NA	4.0475	NA	NA	NA	NA	NA	NA	NA	10.413	NA	NA	NA	2.16287055704567e-25	Brain_Nucleus_accumbens_basal_ganglia	5.17668831042383e-05	Brain_Anterior_cingulate_cortex_BA24	1.61519	0.384807	0.384807	4.0475	10.413	2
MS4A4E	ENSG00000214787.9	3.70893834245318e-26	3	1	3	0	+	10.5795	1.25607396694702e-15	10.5795	NA	NA	NA	NA	NA	NA	NA	10.5795	NA	NA	NA	10.5795	10.5795	3.70893834245311e-26	Brain_Spinal_cord_cervical_c-1	3.70893834245319e-26	Brain_Hippocampus	3	5.47382212626882e-48	3	10.5795	10.5795	1
ABCA7	ENSG00000064687.12	5.884381413575e-24	13	5	10	3	+	1.40283	3.66311	3.15797	-1.31341	-7.38156	3.49503	2.27624	2.28958	3.40161	4.07206	1.1707	4.56912	-4.64785	3.14674	3.91471	3.24385	1.56440055922162e-13	Brain_Anterior_cingulate_cortex_BA24	0.241719	Brain_Hippocampus	8.65527	4.0151943694608e-17	0.370697	-7.38156	4.56912	5
CR1	ENSG00000203710.10	8.87178306005594e-21	10	3	9	1	+	7.61876	4.47212	8.77013	8.70755	9.93606	9.83041	NA	NA	9.93606	9.93991	9.25292	1.51452	9.83041	9.98336	-2.74363	NA	1.80258358039814e-23	Brain_Putamen_basal_ganglia	0.129893	Brain_Hypothalamus	7.96759	1.20282144353765e-17	0.650154	-2.74363	9.98336	3
CLU	ENSG00000120885.21	1.0898767336504e-18	3	3	0	3	-	-6.98053	2.95165	-6.98053	NA	NA	NA	NA	NA	NA	NA	NA	-3.62885	-9.19202	-8.12073	NA	NA	3.85541138889633e-20	Brain_Nucleus_accumbens_basal_ganglia	0.000284688	Brain_Hypothalamus	2.14693	0.202267	0.202267	-9.19202	-3.62885	3
KLC3	ENSG00000104892.16	2.90950716291512e-17	10	2	0	10	-	-7.22007	1.17742	-7.22007	-7.9437	-5.45197	-7.9437	NA	NA	-7.9437	-7.9437	-7.9437	-7.98968	-5.43035	-7.9437	NA	-5.66653	1.35285478950885e-15	Brain_Hypothalamus	5.62450439281516e-08	Brain_Nucleus_accumbens_basal_ganglia	9.4304	1.93146006688866e-17	0.373885	-7.98968	-5.43035	2
MS4A4A	ENSG00000110079.16	2.47668098104404e-16	6	5	5	1	+	3.02173	3.88872	4.19428	NA	NA	6.95032	-2.84099	1.13368	NA	NA	4.78773	1.13368	NA	6.96596	NA	NA	3.26168441928154e-12	Brain_Putamen_basal_ganglia	0.256929	Brain_Cerebellum	3.62198	3.43733669336946e-17	0.140021	-2.84099	6.96596	5
GEMIN7	ENSG00000142252.10	7.73159779950754e-16	13	2	13	0	+	5.86318	1.5609	5.86318	6.3744	6.00762	6.3744	0.690521	6.3744	6.3744	6.3744	6.3744	5.98705	6.3744	6.16653	6.3744	6.3744	1.8368045156227e-10	Brain_Amygdala	0.489867	Brain_Cerebellar_Hemisphere	12.4713	2.1563308338429e-17	0.467245	0.690521	6.3744	2
PPP1R37	ENSG00000104866.10	2.10363376763769e-15	11	5	0	11	-	-5.11035	1.79528	-5.11035	NA	NA	-5.11151	-1.09007	-4.47677	-6.64142	-6.3744	-5.13965	-6.91848	-6.21457	-5.13627	-2.73628	-6.3744	4.56529967051527e-12	Brain_Hypothalamus	0.275683	Brain_Cerebellar_Hemisphere	6.7279	1.5864160874945e-18	0.30012	-6.91848	-1.09007	5
PICALM	ENSG00000073921.17	1.75477094208314e-14	10	4	9	1	+	4.87932	3.19734	5.71908	7.28014	NA	NA	7.28014	3.3296	NA	7.28014	3.78441	-2.67856	4.62745	7.28014	3.3296	7.28014	3.33469401061397e-13	Brain_Cerebellar_Hemisphere	0.00739389	Brain_Hypothalamus	6.09631	7.26817573793148e-17	0.467525	-2.67856	7.28014	4
RIN3	ENSG00000100599.15	3.48346541521373e-13	13	4	1	12	-	-2.08118	1.86637	-2.48736	-2.43354	-2.43354	-2.43354	2.793	-0.874859	-1.74715	-1.75556	-2.43354	-2.43354	-2.43354	-6.00246	-2.43354	-2.43354	1.94354493142817e-09	Brain_Putamen_basal_ganglia	0.381651	Brain_Cerebellum	8.15986	3.49773560993307e-19	0.497897	-6.00246	2.793	4
CD2AP	ENSG00000198087.7	5.51065017582142e-13	8	3	7	1	+	3.16142	2.5469	3.66844	NA	6.46753	NA	-0.387734	3.03569	4.56479	NA	4.56479	NA	0.718627	0.718627	5.60903	NA	9.96182317708649e-11	Brain_Anterior_cingulate_cortex_BA24	0.698213	Brain_Cerebellar_Hemisphere	5.34345	2.51593169468482e-17	0.775609	-0.387734	6.46753	3
CASS4	ENSG00000087589.16	2.94299561229729e-12	13	4	2	11	-	-5.35959	3.09599	-6.57303	-6.37922	-7.22795	-5.43532	0.601641	2.0271	-6.37018	-7.39774	-6.37922	-6.37922	-4.54127	-7.39774	-7.39774	-7.39774	1.38516874946196e-13	Brain_Frontal_Cortex_BA9	0.547413	Brain_Cerebellar_Hemisphere	9.16937	3.31214948744165e-17	0.389611	-7.39774	2.0271	4
BTNL2	ENSG00000204290.10	1.59445419063235e-10	9	7	8	1	+	4.09107	2.69344	4.72403	NA	NA	5.98168	NA	6.06155	6.48566	2.21398	4.63676	-0.972639	5.16931	6.24652	0.996771	NA	8.83471173608567e-11	Brain_Cortex	0.330733	Brain_Hypothalamus	3.89265	0.0184482	0.151186	-0.972639	6.48566	7
HLA-DQA2	ENSG00000237541.3	2.84439185922005e-10	11	6	0	11	-	-4.40147	1.45754	-4.40147	-5.57962	NA	-4.47416	-3.96874	-4.81257	-4.24835	-3.34752	-2.19845	NA	-7.35312	-2.62967	-4.14216	-5.66176	1.9363178624337e-13	Brain_Nucleus_accumbens_basal_ganglia	0.0279174	Brain_Hippocampus	7.2132	0.015453	0.256417	-7.35312	-2.19845	6
HLA-DQA1	ENSG00000196735.11	3.00354736167388e-10	12	5	10	2	+	1.22328	3.18147	2.2413	4.30217	4.3611	4.3611	-0.119743	1.24724	1.52721	0.532261	-7.61389	0.92135	1.21411	2.46423	1.48221	NA	2.65971734003659e-14	Brain_Hippocampus	0.904687	Brain_Cerebellar_Hemisphere	7.85278	6.85889527063629e-17	0.321235	-7.61389	4.3611	5
CD33	ENSG00000105383.14	4.39219736049398e-10	13	4	13	0	+	3.88797	2.14165	3.88797	5.01169	0.682002	1.55885	5.01537	5.01668	0.682002	5.01253	6.82683	5.01337	0.682002	5.0119	5.01521	5.01521	8.6812069118752e-12	Brain_Hippocampus	0.495238	Brain_Anterior_cingulate_cortex_BA24	8.48722	2.00819494199712e-17	0.53325	0.682002	6.82683	4
APH1B	ENSG00000138613.13	6.67852022738201e-10	11	3	10	1	+	5.03396	2.81678	5.72972	1.15617	-1.92366	6.43691	6.43691	6.43691	4.64575	6.43691	6.43691	NA	NA	6.43691	6.43691	6.43691	1.21932355630225e-10	Brain_Caudate_basal_ganglia	0.24761	Brain_Amygdala	8.87746	1.12079386422757e-18	0.96805	-1.92366	6.43691	3
RP11-385F7.1	ENSG00000270761.1	9.10356260584739e-10	12	1	0	12	-	-5.97419	1.04175	-5.97419	-6.46753	-6.46753	-3.82828	-6.46753	-6.16391	-6.60673	-6.46753	NA	-6.11869	-6.46753	-3.69998	-6.46753	-6.46753	3.92901110218592e-11	Brain_Cortex	0.000215619	Brain_Putamen_basal_ganglia	11.4916	2.03768596452701e-17	11.4916	-6.60673	-3.69998	1
RP11-138I18.2	ENSG00000271046.1	1.43403785848061e-09	3	3	3	0	+	3.4278	2.75287	3.4278	NA	NA	NA	NA	NA	NA	1.72102	NA	NA	NA	NA	6.60357	1.9588	4.01368806355217e-11	Brain_Spinal_cord_cervical_c-1	0.0852465	Brain_Frontal_Cortex_BA9	1.4478	0.736039	0.736039	1.72102	6.60357	3
GATS	ENSG00000239521.7	2.55259470723668e-09	10	5	4	6	NA	-2.31684	2.87866	NA	NA	0.618286	-4.1901	NA	-6.35314	-0.0381603	NA	-4.40269	-5.38617	0.618286	0.0349243	0.5044	-4.57409	2.10969605558057e-10	Brain_Cerebellum	0.97214	Brain_Putamen_basal_ganglia	4.67528	1.68190908637044e-17	0.261438	-6.35314	0.618286	5
B4GALT3	ENSG00000158850.14	2.72535501442356e-09	11	4	9	2	+	-0.019077	2.59814	0.935856	4.83729	0.144268	0.144268	-4.13116	-4.50139	0.144268	NA	0.144268	2.57554	0.144268	0.144268	NA	0.144268	1.3162236045656e-06	Brain_Amygdala	0.885289	Brain_Anterior_cingulate_cortex_BA24	7.99575	9.37559828428197e-17	0.492689	-4.50139	4.83729	4
SCIMP	ENSG00000161929.14	2.94352556603964e-09	13	4	13	0	+	3.17167	2.24602	3.17167	5.06251	0.00872969	5.86357	1.95991	2.37798	3.45784	1.68418	5.83663	5.83663	2.19957	0.00872969	1.23295	5.70248	4.53015755787562e-09	Brain_Caudate_basal_ganglia	0.993035	Brain_Putamen_basal_ganglia	5.86944	1.23050907884898e-17	0.368231	0.00872969	5.86357	4
FCER1G	ENSG00000158869.10	6.31198111366693e-09	11	5	0	11	-	-3.58107	1.89793	-3.58107	NA	-0.616096	NA	-2.58494	-2.41331	-4.88531	-4.71765	-2.41331	-5.4414	-5.12711	-5.4414	-5.1351	-0.616096	5.28638744478562e-08	Brain_Putamen_basal_ganglia	0.537831	Brain_Anterior_cingulate_cortex_BA24	6.09709	1.96603658538396e-17	0.366615	-5.4414	-0.616096	5
ADAM10	ENSG00000137845.14	6.31776696246965e-09	13	5	13	0	+	3.81723	1.82989	3.81723	1.92932	2.02982	4.67189	2.38315	1.18482	3.01269	1.92932	6.42139	6.11243	4.18151	4.9286	6.10614	4.73288	1.35032324184786e-10	Brain_Hippocampus	0.23609	Brain_Cerebellum	8.93065	1.72007422055599e-18	0.410453	1.18482	6.42139	5
HLA-DRB1	ENSG00000196126.11	7.65686867043077e-09	8	3	8	0	+	4.5177	1.85665	4.5177	NA	NA	0.421437	NA	6.44954	4.90191	3.90946	NA	4.66335	6.22189	4.91068	4.66335	NA	1.12187574791291e-10	Brain_Cerebellum	0.673436	Brain_Caudate_basal_ganglia	5.82061	3.13793581577138e-18	0.24535	0.421437	6.44954	3
SCARA3	ENSG00000168077.13	7.72941722448384e-09	10	6	6	4	NA	-0.357732	3.22963	NA	NA	1.4225	0.411344	2.70394	-5.07645	NA	-0.312038	2.79177	NA	0.652597	2.91741	-5.48005	-3.60836	4.25215935525127e-08	Brain_Spinal_cord_cervical_c-1	0.755012	Brain_Frontal_Cortex_BA9	5.12983	1.52677573980239e-16	0.244924	-5.48005	2.91741	6
PSMC3	ENSG00000165916.8	1.33640277335367e-08	13	2	3	10	-	-1.13919	1.69284	-1.85027	-1.53667	-1.8566	1.31609	-0.629049	-2.01681	-1.76692	-1.92223	1.18856	1.18856	-1.16117	-0.90566	-4.92684	-1.78077	8.35714284138102e-07	Brain_Spinal_cord_cervical_c-1	0.529317	Brain_Cerebellar_Hemisphere	11.9267	6.07733560436113e-18	1.00516	-4.92684	1.31609	2
CLASRP	ENSG00000104859.14	2.08935418006131e-08	1	1	1	0	+	5.60443	NA	5.60443	NA	NA	5.60443	NA	NA	NA	NA	NA	NA	NA	NA	NA	NA	2.0893541800613e-08	Brain_Caudate_basal_ganglia	2.0893541800613e-08	Brain_Caudate_basal_ganglia	1	1	1	5.60443	5.60443	1
ERCC2	ENSG00000104884.14	2.14573487751697e-08	6	3	6	0	+	4.41491	1.86627	4.41491	NA	5.20382	NA	NA	NA	NA	5.20382	NA	5.13599	0.60601	NA	5.13599	5.20382	1.95231373042145e-07	Brain_Frontal_Cortex_BA9	0.544508	Brain_Nucleus_accumbens_basal_ganglia	3.62934	1.02230854522477e-17	0.946996	0.60601	5.20382	3
SRRM5	ENSG00000226763.4	2.48822632050035e-08	8	4	5	3	NA	-0.683382	2.7192	NA	NA	NA	0.0208904	-2.85279	NA	1.8439	2.9856	NA	-5.15995	0.527194	NA	0.0208904	-2.85279	2.47016094885406e-07	Brain_Hypothalamus	0.983333	Brain_Caudate_basal_ganglia	3.4803	1.94797538796972e-17	0.965673	-5.15995	2.9856	4
RP11-30K9.6	ENSG00000245975.2	2.56043459260863e-08	13	2	0	13	-	-5.07171	0.679535	-5.07171	-4.47136	-4.47136	-5.90838	-4.47136	-5.8871	-5.78478	-4.47136	-5.63462	-5.61971	-5.79818	-4.47136	-4.47136	-4.47136	3.45480005668702e-09	Brain_Caudate_basal_ganglia	7.77240052930552e-06	Brain_Cerebellar_Hemisphere	12.1861	9.99358851802815e-18	0.81385	-5.90838	-4.47136	2
GPC2	ENSG00000213420.7	2.56458436454625e-08	13	6	12	1	+	2.47497	2.18331	2.78568	4.11776	1.19174	5.11879	5.54481	5.30539	1.19174	0.643232	-1.25363	2.41979	3.40091	3.45869	0.381366	0.654	2.94270781809705e-08	Brain_Cerebellar_Hemisphere	0.702931	Brain_Spinal_cord_cervical_c-1	6.71627	6.09817456852147e-17	0.418981	-1.25363	5.54481	6
MINDY2	ENSG00000128923.10	2.74334995845697e-08	13	3	4	9	-	-1.392	3.3943	-3.29493	-4.47136	-4.47136	-4.47136	4.47136	4.47136	-4.47136	-4.02868	1.31264	-0.998369	-0.769051	-1.50145	1.30302	-4.47136	7.77240052930545e-06	Brain_Amygdala	0.441863	Brain_Nucleus_accumbens_basal_ganglia	9.21861	2.82400417324755e-17	1.26521	-4.47136	4.47136	3
HLA-DRA	ENSG00000204287.13	3.36645871072708e-08	8	5	7	1	+	3.40473	2.58228	4.05237	NA	4.62057	5.55276	2.33615	NA	1.45047	NA	NA	2.33615	6.24757	5.82293	-1.12877	NA	4.16897545592154e-10	Brain_Nucleus_accumbens_basal_ganglia	0.258993	Brain_Spinal_cord_cervical_c-1	3.90022	9.35963519435401e-17	0.27556	-1.12877	6.24757	5
RP11-333E1.2	ENSG00000263164.1	4.65285136245319e-08	10	3	6	4	NA	0.459928	2.73742	NA	5.71323	-2.29959	1.77495	-2.29959	0.946628	1.15527	1.22907	-2.29959	-2.29959	NA	NA	NA	2.97849	1.10854092463343e-08	Brain_Amygdala	0.343828	Brain_Cerebellum	7.49203	5.2063597490168e-17	0.320887	-2.29959	5.71323	3
STAG3	ENSG00000066923.17	7.15130853589418e-08	13	3	1	12	-	-4.61386	1.71136	-5.04987	-5.30539	-5.30539	-5.35008	0.618286	-5.07644	-3.76712	-5.30539	-5.30539	-6.18391	-5.45792	-3.77422	-4.46179	-5.30539	6.25332594276922e-10	Brain_Hypothalamus	0.536387	Brain_Cerebellar_Hemisphere	11.2025	7.35615680799098e-18	0.423024	-6.18391	0.618286	3
SPI1	ENSG00000066336.11	7.73183335664973e-08	12	2	11	1	+	2.67033	2.87405	3.41281	5.65854	1.88522	2.56495	-5.49685	2.56495	4.73328	2.56495	5.02344	NA	4.85067	2.56495	2.56495	2.56495	1.52663795414235e-08	Brain_Amygdala	0.0593997	Brain_Anterior_cingulate_cortex_BA24	9.61397	3.27185012175623e-17	2.21267	-5.49685	5.65854	2
RTFDC1	ENSG00000022277.12	8.53048198794734e-08	4	2	4	0	+	2.68759	2.19777	2.68759	NA	NA	NA	2.40465	NA	2.40465	0.308735	NA	NA	NA	5.63234	NA	NA	1.77783752913124e-08	Brain_Putamen_basal_ganglia	0.757523	Brain_Frontal_Cortex_BA9	3.10648	2.16803052821103e-17	0.874831	0.308735	5.63234	2
HLA-DQB2	ENSG00000232629.8	8.61172751098289e-08	13	4	1	12	-	-3.13813	1.47754	-3.43627	-4.17429	0.439499	-4.14216	-3.70514	-2.21427	-1.94681	-2.8746	-4.10558	-4.17429	-4.27202	-4.16238	-4.14216	-1.3215	1.93706173515704e-05	Brain_Nucleus_accumbens_basal_ganglia	0.6603	Brain_Anterior_cingulate_cortex_BA24	10.0217	2.59358264272932e-17	0.338627	-4.27202	0.439499	4
GCNT7	ENSG00000124091.9	8.92709452226032e-08	7	2	5	2	+	0.900152	2.13439	1.38097	NA	NA	-0.301898	5.69727	0.301898	-0.301898	0.301898	NA	NA	0.301898	NA	0.301898	NA	1.21741450593828e-08	Brain_Cerebellar_Hemisphere	0.76273	Brain_Frontal_Cortex_BA9	6.00206	5.02214807097679e-50	0.997935	-0.301898	5.69727	2
CNPY4	ENSG00000166997.7	9.48790667630474e-08	8	5	0	8	-	-2.34669	1.52884	-2.34669	NA	-4.7903	NA	NA	NA	-1.89232	-1.89232	-1.0232	-1.813	-4.66283	-1.89232	-0.807257	NA	1.66534603900084e-06	Brain_Anterior_cingulate_cortex_BA24	0.419519	Brain_Spinal_cord_cervical_c-1	5.48408	1.85429791660194e-17	0.187935	-4.7903	-0.807257	5
AXL	ENSG00000167601.11	9.55331909539383e-08	8	4	1	7	-	-0.781959	1.65133	-1.27315	NA	2.65637	-1.1096	-0.884627	-0.465142	NA	-3.39006	NA	-1.15344	-0.799579	-1.1096	NA	NA	0.000698779	Brain_Frontal_Cortex_BA9	0.64183	Brain_Cerebellum	6.23909	2.29067421006476e-16	0.318788	-3.39006	2.65637	4
IRGQ	ENSG00000167378.8	9.57742091189909e-08	13	5	10	3	+	0.330308	2.77596	1.65583	-5.44014	1.8134	1.93435	1.95442	1.8439	0.417388	-1.30479	1.77589	2.17518	0.27423	1.8702	-5.51935	2.49933	3.40249881143704e-08	Brain_Spinal_cord_cervical_c-1	0.783908	Brain_Nucleus_accumbens_basal_ganglia	5.77195	9.39334383114265e-17	0.805284	-5.51935	2.49933	5
ERCC1	ENSG00000012061.15	1.06486839193197e-07	7	5	0	7	-	-3.24869	1.10718	-3.24869	-5.2345	-3.5404	-2.62225	NA	-3.11603	-1.57125	NA	NA	NA	NA	-3.5404	-3.11603	NA	1.65429570929192e-07	Brain_Amygdala	0.116123	Brain_Cortex	3.54136	3.90583589891742e-17	0.155622	-5.2345	-1.57125	5
AGFG2	ENSG00000106351.12	1.12669232691865e-07	13	3	13	0	+	2.09698	1.71142	2.09698	1.49653	1.49653	1.49653	5.90792	5.89678	1.49653	1.49653	1.49653	1.49653	1.49653	0.490656	1.49653	1.49653	3.46454661264078e-09	Brain_Cerebellar_Hemisphere	0.62367	Brain_Putamen_basal_ganglia	10.5289	1.75448758889289e-19	0.607312	0.490656	5.90792	3
CR2	ENSG00000117322.17	1.2035002595519e-07	4	4	2	2	NA	0.858225	3.53061	NA	NA	NA	NA	NA	NA	NA	NA	5.66285	-1.12788	NA	NA	-2.33913	1.23706	1.48877352927541e-08	Brain_Hippocampus	0.259369	Brain_Hypothalamus	1.48945	0.569403	0.569403	-2.33913	5.66285	4
GRN	ENSG00000030582.17	1.42148811397236e-07	12	3	1	11	-	-4.5287	2.45476	-5.10117	1.76849	-5.64699	-5.64699	-5.64699	-5.64699	-5.3004	-5.28716	NA	-0.545934	-5.66424	-5.47608	-5.60412	-5.64699	1.47680920808692e-08	Brain_Nucleus_accumbens_basal_ganglia	0.585111	Brain_Hypothalamus	9.91481	5.64742262302585e-17	0.864456	-5.66424	1.76849	3
FAM180B	ENSG00000196666.4	1.59995443294502e-07	13	4	0	13	-	-3.63157	1.53514	-3.63157	-0.716452	-2.83572	-4.79468	-5.04449	-4.65428	-4.65428	-4.7956	-0.716452	-3.80274	-4.79468	-4.72958	-2.83572	-2.83572	4.54733084235178e-07	Brain_Cerebellar_Hemisphere	0.473712	Brain_Hippocampus	8.40939	1.32340059459757e-17	0.337557	-5.04449	-0.716452	4
GRIN3B	ENSG00000116032.5	2.5771595534758e-07	10	8	3	7	-	-1.11945	2.08586	-2.20328	0.757432	-1.1449	NA	-1.40881	-3.02968	0.957279	-0.626328	NA	NA	-3.78293	-3.70478	-1.72552	2.51371	0.000154993	Brain_Nucleus_accumbens_basal_ganglia	0.5311	Brain_Frontal_Cortex_BA9	4.97744	0.00828802	0.195351	-3.78293	2.51371	8
NDUFS2	ENSG00000158864.12	3.50768667835824e-07	13	2	0	13	-	-4.88398	0.974099	-4.88398	-6.28478	-4.04648	-4.68955	-4.04648	-6.13425	-4.62111	-3.02364	-6.12001	-5.01713	-4.64537	-5.54408	-5.2724	-4.04648	3.2832562291924e-10	Brain_Amygdala	0.00249751	Brain_Frontal_Cortex_BA9	10.6571	3.2854482184965e-17	1.83968	-6.28478	-3.02364	2
ACE	ENSG00000159640.15	3.51987035460071e-07	13	1	1	12	-	-4.20518	2.9033	-5.01011	-5.08926	-5.08926	-4.93097	-5.08926	-4.93097	-5.08926	-4.93097	-5.08926	-4.93097	-5.08926	5.45399	-4.93097	-4.93097	4.92521452518498e-08	Brain_Putamen_basal_ganglia	8.18222200987961e-07	Brain_Substantia_nigra	12.7096	2.24079211351698e-17	12.7096	-5.08926	5.45399	1
ZNF234	ENSG00000263002.7	4.27501714702914e-07	6	4	1	5	-	-1.1274	1.40735	-1.45289	-2.30048	NA	NA	NA	NA	-0.0300039	NA	NA	0.500037	-1.81498	-0.176013	NA	-2.94297	0.00325083	Brain_Substantia_nigra	0.976064	Brain_Cortex	4.13414	9.51585980502212e-17	0.165017	-2.94297	0.500037	4
RP11-521O16.2	ENSG00000260163.1	7.56231775439599e-07	13	2	13	0	+	2.16029	1.30009	2.16029	1.71419	1.11559	1.71419	1.71419	2.82339	2.26649	1.38148	0.840771	1.48445	1.71419	1.56602	5.03927	4.7095	4.6730520526473e-07	Brain_Spinal_cord_cervical_c-1	0.400476	Brain_Hippocampus	10.9079	2.29977100838188e-17	1.94397	0.840771	5.03927	2
ACP2	ENSG00000134575.9	7.69225120460722e-07	13	2	7	6	NA	-0.742655	1.75987	NA	-0.194385	-4.62392	-2.83689	0.329375	-2.00615	-0.194385	0.500793	0.494475	0.504342	0.467093	0.491063	0.459997	-3.04593	3.76556941283375e-06	Brain_Anterior_cingulate_cortex_BA24	0.845874	Brain_Amygdala	11.2804	1.42492852919655e-17	1.42344	-4.62392	0.504342	2
CLEC18C	ENSG00000157335.20	8.88439244714138e-07	3	3	1	2	-	-0.217948	1.54142	-1.09717	NA	NA	NA	-0.858673	1.5405	-1.33567	NA	NA	NA	NA	NA	NA	NA	0.123439	Brain_Cerebellum	0.390521	Brain_Cerebellar_Hemisphere	1.98815	0.0997326	0.0997326	-1.33567	1.5405	3
SLTM	ENSG00000137776.16	9.34179254868808e-07	13	5	9	4	+	0.934101	2.85891	2.67784	-1.28055	3.4867	-3.39529	0.939237	2.58415	-3.88612	2.55178	-3.39529	2.64184	2.61448	2.66626	3.84976	2.76637	0.000101858	Brain_Cortex	0.347609	Brain_Cerebellar_Hemisphere	7.52091	2.42845531582307e-17	0.328372	-3.88612	3.84976	5
CHRNA2	ENSG00000120903.12	1.0055213153679e-06	11	6	9	2	+	-0.0282798	2.56421	0.891489	0.572825	-6.03687	-2.2976	0.195053	0.522216	0.158952	0.451611	4.7432	0.538923	0.538923	NA	0.301699	NA	1.57128029432059e-09	Brain_Anterior_cingulate_cortex_BA24	0.873707	Brain_Cortex	6.42197	2.13637155148494e-17	0.268991	-6.03687	4.7432	6
PVRIG	ENSG00000213413.2	1.0564246124151e-06	12	5	2	10	-	-4.05276	2.43151	-4.98288	0.57741	-3.29292	-5.88429	-5.02477	-5.50518	-6.0187	-2.40287	-4.86739	NA	0.618286	-5.3204	-5.50055	-6.01172	1.75827153167484e-09	Brain_Cortex	0.563662	Brain_Amygdala	8.13917	9.28370449891712e-18	0.584327	-6.0187	0.618286	5
TMEM106B	ENSG00000106460.18	1.09151403306918e-06	11	4	0	11	-	-3.89377	1.11658	-3.89377	-3.65534	NA	NA	-5.18068	-3.97945	-3.9903	-2.35393	-2.50853	-3.65534	-5.05241	-2.35393	-5.04917	-5.05241	2.21078622137294e-07	Brain_Cerebellar_Hemisphere	0.018576	Brain_Putamen_basal_ganglia	8.33687	4.31142284094944e-18	0.536681	-5.18068	-2.35393	4
SLC39A13	ENSG00000165915.13	1.10283261222582e-06	12	2	0	12	-	-4.98318	0.465134	-4.98318	NA	-4.99573	-6.01303	-4.22082	-4.22082	-4.99573	-4.99573	-4.99573	-5.37767	-4.99573	-4.99573	-4.99573	-4.99573	1.82088333299889e-09	Brain_Caudate_basal_ganglia	2.43410668220896e-05	Brain_Cerebellum	10.9847	1.1576824431308e-17	0.910291	-6.01303	-4.22082	2
TMC3	ENSG00000188869.12	1.13785073143796e-06	6	4	4	2	+	1.03444	2.10241	2.13581	NA	1.80235	NA	-0.534257	-1.80235	0.150607	3.29514	NA	NA	NA	NA	3.29514	NA	0.000983723	Brain_Frontal_Cortex_BA9	0.880286	Brain_Cortex	4.09952	3.89237743041849e-17	0.245043	-1.80235	3.29514	4
HLA-B	ENSG00000234745.10	1.14837588943929e-06	11	7	0	11	-	-2.85288	1.16023	-2.85288	-4.70612	NA	-1.89838	-2.58334	-1.53938	-1.73103	-3.12766	-3.0384	-4.25014	-1.4452	-2.79084	-4.27117	NA	2.52472977038741e-06	Brain_Amygdala	0.148401	Brain_Nucleus_accumbens_basal_ganglia	5.36019	0.0307129	0.193063	-4.70612	-1.4452	7
GAL3ST4	ENSG00000197093.10	1.46055160654091e-06	3	3	2	1	+	1.59489	4.66697	4.21476	NA	NA	NA	5.30539	3.12412	NA	NA	-3.64485	NA	NA	NA	NA	NA	1.1242978007298e-07	Brain_Cerebellar_Hemisphere	0.0017834	Brain_Cerebellum	1.97772	0.337845	0.337845	-3.64485	5.30539	3
ZNF112	ENSG00000062370.16	1.73143703294496e-06	8	5	7	1	+	1.09315	2.89298	1.98013	NA	1.31291	1.15065	1.84619	-5.11565	5.11565	NA	1.13761	NA	0.504994	NA	NA	2.79289	3.12662855108488e-07	Brain_Cortex	0.613563	Brain_Nucleus_accumbens_basal_ganglia	3.4784	8.77837054523995e-18	0.389641	-5.11565	5.11565	5
RP11-543C4.1	ENSG00000247970.2	1.89035669813043e-06	13	6	7	6	NA	0.644727	1.35826	NA	-0.388239	-0.388239	0.506564	2.85622	0.506768	-0.731803	-0.421553	2.85622	-0.388239	0.997821	2.85299	0.511181	-0.388239	0.00428721	Brain_Cerebellar_Hemisphere	0.697839	Brain_Anterior_cingulate_cortex_BA24	6.22163	8.97681330756653e-19	0.284799	-0.731803	2.85622	6
FBXO46	ENSG00000177051.5	2.12300485615821e-06	6	3	1	5	-	-3.00009	3.69356	-4.4983	-4.70714	-4.70714	-3.66295	4.491	NA	NA	NA	-4.70714	NA	NA	-4.70714	NA	NA	2.51215837344453e-06	Brain_Amygdala	0.000249324	Brain_Caudate_basal_ganglia	4.67941	1.06347487084262e-18	0.530329	-4.70714	4.491	3
HAVCR1	ENSG00000113249.12	2.50181620080839e-06	6	3	6	0	+	3.57762	1.52132	3.57762	0.890481	NA	NA	NA	NA	NA	5.08397	3.50195	3.50195	3.47439	NA	5.01297	NA	3.69634565367079e-07	Brain_Frontal_Cortex_BA9	0.373208	Brain_Amygdala	3.79543	4.37673305098295e-17	0.582336	0.890481	5.08397	3

## Sheet: Sheet 2
S-MultiXcan results using GTEx data: AD-relevant tissues
gene_name	ensembl_gene_id	smultixcan_pvalue	n	n_indep	n_pos_dir	n_neg_dir	consensus	z_mean	z_sd	z_concordant_mean	BrainAmygdala	BrainAnteriorcingulatecortexBA24	BrainCaudatebasalganglia	BrainCerebellarHemisphere	BrainCerebellum	BrainCortex	BrainFrontalCortexBA9	BrainHippocampus	BrainHypothalamus	BrainNucleusaccumbensbasalganglia	BrainPutamenbasalganglia	BrainSpinalcordcervicalc1	BrainSubstantianigra	SkinNotSunExposedSuprapubic	SkinSunExposedLowerleg	Spleen	WholeBlood	p_i_best	t_i_best	p_i_worst	t_i_worst	eigen_max	eigen_min	eigen_min_kept	z_min	z_max	tmi
APOC1	ENSG00000130208.9	0	5	3	1	4	-	-20.4366	19.2417	-27.2115	NA	-6.66307	NA	NA	NA	NA	NA	NA	NA	-34.061	NA	6.66307	NA	-34.061	-34.061	NA	NA	2.79329241809853e-254	Brain_Nucleus_accumbens_basal_ganglia	2.68158520945578e-11	Brain_Anterior_cingulate_cortex_BA24	2.58737	1.21134232304032e-17	0.491708	-34.061	6.66307	3
APOE	ENSG00000130203.9	0	11	5	7	4	NA	9.51616	28.8273	NA	32.2064	32.2064	6.66307	NA	NA	NA	-33.3565	32.2064	NA	32.2064	32.2064	NA	32.2064	-34.061	-27.6686	NA	-0.137666	2.79329241809853e-254	Skin_Not_Sun_Exposed_Suprapubic	0.890504	Whole_Blood	7.8744	4.62455819947711e-18	0.308891	-34.061	32.2064	5
NECTIN2	ENSG00000130202.9	0	12	6	2	10	-	-5.36453	13.9107	-10.2744	NA	NA	-14.7005	19.1848	NA	NA	-5.34584	-31.4154	NA	-14.7005	19.1848	-5.34584	-7.94724	-7.42621	-11.5673	-1.84746	-2.44769	1.24669417707619e-216	Brain_Hippocampus	0.0646808	Spleen	4.60642	1.69367384881622e-16	0.327898	-31.4154	19.1848	6
APOC4	ENSG00000267467.3	1.37232084587753e-302	5	2	4	1	+	4.53072	21.5734	14.1786	14.1786	NA	14.1786	NA	NA	NA	NA	NA	NA	-34.061	NA	14.1786	NA	NA	NA	NA	14.1786	2.79329241809694e-254	Brain_Nucleus_accumbens_basal_ganglia	1.24235250276151e-45	Brain_Amygdala	4.0011	5.03581356054808e-17	0.998896	-34.061	14.1786	2
TOMM40	ENSG00000130204.12	7.49200840625997e-235	16	3	1	15	-	-1.09938	8.19973	-3.14931	-3.14931	-3.14931	-3.14931	-3.14931	-3.14931	29.6496	-3.14931	-3.14931	-3.14931	-3.14931	-3.14931	NA	-3.14931	-3.14931	-3.14931	-3.14931	-3.14931	3.43253566535566e-193	Brain_Cortex	0.00163656	Brain_Anterior_cingulate_cortex_BA24	13.8431	2.84589863569925e-17	0.637177	-3.14931	29.6496	3
ZNF296	ENSG00000170684.8	1.26620793959196e-85	15	7	3	12	-	-4.48859	5.36856	-6.51272	-6.76819	-2.82714	NA	2.73082	NA	-6.73421	-6.90983	-6.99513	-16.9362	-6.7065	-5.27006	-6.77559	-6.76819	-2.73082	2.73082	-2.73082	5.36212	2.43332479715524e-64	Brain_Hypothalamus	0.00631767	Brain_Cerebellar_Hemisphere	7.41031	3.03798916762443e-18	0.496067	-16.9362	5.36212	7
APOC2	ENSG00000234906.9	5.35703660499476e-66	17	4	16	1	+	5.80206	3.62055	6.25267	5.15761	3.57424	8.8772	11.4771	5.20578	7.60711	9.5414	3.57424	3.25681	7.24681	11.0314	-1.40782	5.38322	1.63111	2.65365	3.57424	10.2509	1.72007745048056e-30	Brain_Cerebellar_Hemisphere	0.159185	Brain_Spinal_cord_cervical_c-1	13.0583	4.83953302205115e-17	1.00827	-1.40782	11.4771	4
CEACAM19	ENSG00000186567.12	1.15754877315034e-60	17	2	17	0	+	14.2312	3.52078	14.2312	15.8026	15.7637	15.5901	15.5252	14.4895	14.5446	15.7637	15.7637	15.7637	15.7637	15.7637	15.7637	16.4572	5.58262	4.61034	15.7735	13.2083	7.4443048165223e-61	Brain_Substantia_nigra	4.02004227151694e-06	Skin_Sun_Exposed_Lower_leg	14.7147	8.95033799905964e-20	1.3316	4.61034	16.4572	2
TRAPPC6A	ENSG00000007255.10	7.30787440950234e-40	10	3	0	10	-	-3.41097	4.93182	-3.41097	NA	NA	-0.436061	-0.436061	NA	-13.2281	-0.436061	-0.436061	-0.436061	-0.436061	-8.91456	-8.91456	NA	-0.436061	NA	NA	NA	6.03865673754001e-40	Brain_Cortex	0.662792	Brain_Caudate_basal_ganglia	6.12227	1.53147022509656e-32	1.09586	-13.2281	-0.436061	3
CLPTM1	ENSG00000104853.15	1.19825331738894e-38	16	4	6	10	NA	-2.14763	7.02263	NA	11.3096	11.3096	0.172947	-2.85933	-7.75926	1.06396	-3.40742	-1.06386	4.18452	1.04816	NA	-6.43416	-1.9994	-10.3521	-11.3195	-11.3096	-6.94614	1.05035219585282e-29	Skin_Sun_Exposed_Lower_leg	0.862693	Brain_Caudate_basal_ganglia	8.62927	9.50599462064178e-18	0.761733	-11.3195	11.3096	4
BIN1	ENSG00000136717.14	1.81872240399449e-31	17	5	3	14	-	-3.18406	4.85431	-4.88766	-0.467716	-5.4997	-4.66597	-8.10425	-9.1614	-7.97181	-6.5872	-0.963688	-4.19773	-2.24209	0.777174	-8.53093	-0.470823	-4.76371	-4.80018	8.53093	4.99012	5.12299142911591e-20	Brain_Cerebellum	0.639987	Brain_Amygdala	8.27519	4.35240859272641e-18	0.596256	-9.1614	8.53093	5
PVR	ENSG00000073008.14	1.04408764853817e-30	16	3	0	16	-	-7.90427	2.09603	-7.90427	-6.04244	-6.1974	-8.8995	NA	-7.8081	-11.2772	-8.419	-5.90996	-6.27937	-7.76728	-10.7807	-6.15305	-11.0225	-5.76216	-6.15305	-11.1348	-6.86188	1.70044065849838e-29	Brain_Cortex	8.30460486432521e-09	Skin_Not_Sun_Exposed_Suprapubic	13.6301	3.28041155716538e-18	0.632654	-11.2772	-5.76216	3
MS4A6A	ENSG00000110077.14	4.36248673383323e-27	4	3	4	0	+	8.02726	3.14681	8.02726	NA	4.0475	NA	NA	NA	NA	NA	NA	NA	10.413	NA	NA	NA	NA	NA	6.96596	10.6826	1.22822937137914e-26	Whole_Blood	5.17668831042383e-05	Brain_Anterior_cingulate_cortex_BA24	2.7946	0.0388228	0.481878	4.0475	10.6826	3
MS4A4E	ENSG00000214787.9	1.36232866662839e-26	5	2	5	0	+	10.5921	0.143229	10.5921	NA	NA	NA	NA	NA	NA	NA	10.5795	NA	NA	NA	10.5795	10.5795	NA	NA	10.41	10.8121	3.01607042134199e-27	Whole_Blood	2.23300977347074e-25	Spleen	4.7366	8.5030203115394e-17	0.222239	10.41	10.8121	2
BCAM	ENSG00000187244.10	3.17764068929782e-24	2	2	1	1	NA	-3.16553	9.52215	NA	NA	NA	NA	NA	NA	NA	3.56765	NA	NA	NA	NA	NA	NA	NA	-9.89871	NA	NA	4.21677853987807e-23	Skin_Sun_Exposed_Lower_leg	0.0003602	Brain_Frontal_Cortex_BA9	1.03757	0.962431	0.962431	-9.89871	3.56765	2
MS4A2	ENSG00000149534.8	2.72530435534963e-22	3	2	0	3	-	-9.01064	0.711682	-9.01064	NA	NA	NA	NA	NA	NA	NA	NA	NA	NA	NA	NA	NA	NA	-9.42153	-9.42153	-8.18886	4.44550976384272e-21	Spleen	2.63703853547185e-16	Whole_Blood	2.47419	3.31088266126284e-16	0.525811	-9.42153	-8.18886	2
CR1	ENSG00000203710.10	5.48690155665046e-20	14	4	9	5	NA	4.91118	5.80214	NA	8.70755	9.93606	9.83041	NA	NA	9.93606	9.93991	9.25292	1.51452	9.83041	9.98336	-2.74363	NA	-1.51452	-1.51452	-2.74363	-1.65839	1.80258358039814e-23	Brain_Putamen_basal_ganglia	0.129893	Brain_Hypothalamus	8.24835	2.83610546169027e-18	0.728079	-2.74363	9.98336	4
PPP1R37	ENSG00000104866.10	6.10648764049893e-20	15	6	2	13	-	-3.7969	4.2515	-5.29174	NA	NA	-5.11151	-1.09007	-4.47677	-6.64142	-6.3744	-5.13965	-6.91848	-6.21457	-5.13627	-2.73628	-6.3744	5.46467	6.3744	-5.98147	-6.59729	4.56529967051527e-12	Brain_Hypothalamus	0.275683	Brain_Cerebellar_Hemisphere	7.84101	2.46275167486588e-18	0.306582	-6.91848	6.3744	6
CLU	ENSG00000120885.21	3.21035165887645e-19	6	4	3	3	NA	-0.283718	7.83985	NA	NA	NA	NA	NA	NA	NA	NA	NA	-3.62885	-9.19202	-8.12073	NA	NA	7.1712	9.19202	2.87607	NA	3.85541138889633e-20	Brain_Nucleus_accumbens_basal_ganglia	0.00402666	Spleen	4.35197	3.18292282091596e-18	0.149719	-9.19202	9.19202	4
MS4A6E	ENSG00000166926.8	7.16975921605247e-19	2	2	1	1	NA	-2.33038	6.63367	NA	NA	NA	NA	NA	NA	NA	NA	NA	NA	NA	NA	NA	NA	NA	NA	2.36033	-7.0211	2.20134167761664e-12	Whole_Blood	0.0182585	Spleen	1.81696	0.183039	0.183039	-7.0211	2.36033	2
CR2	ENSG00000117322.17	9.86355672369383e-19	6	5	3	3	NA	0.500839	2.90817	NA	NA	NA	NA	NA	NA	NA	NA	5.66285	-1.12788	NA	NA	-2.33913	1.23706	NA	NA	-1.50985	1.08199	1.48877352927541e-08	Brain_Hippocampus	0.279259	Whole_Blood	2.11175	1.30352618397208e-16	0.255363	-2.33913	5.66285	5
ABCA7	ENSG00000064687.12	4.79255514380738e-18	17	6	13	4	+	1.06576	3.52956	2.79326	-1.31341	-7.38156	3.49503	2.27624	2.28958	3.40161	4.07206	1.1707	4.56912	-4.64785	3.14674	3.91471	3.24385	1.01878	2.38445	-4.85173	1.32954	1.56440055922162e-13	Brain_Anterior_cingulate_cortex_BA24	0.308308	Skin_Not_Sun_Exposed_Suprapubic	10.279	6.36382894756612e-17	0.412341	-7.38156	4.56912	6
MS4A4A	ENSG00000110079.16	9.11020094074242e-18	10	5	8	2	+	3.57741	4.07535	5.17532	NA	NA	6.95032	-2.84099	1.13368	NA	NA	4.78773	1.13368	NA	6.96596	NA	NA	6.96596	-2.78744	6.96596	6.49927	3.26168441928154e-12	Brain_Putamen_basal_ganglia	0.256929	Brain_Cerebellum	5.75097	5.9155542283557e-19	0.309695	-2.84099	6.96596	5
KLC3	ENSG00000104892.16	1.35896273267439e-17	14	3	1	13	-	-5.7054	4.37936	-6.79759	-7.9437	-5.45197	-7.9437	NA	NA	-7.9437	-7.9437	-7.9437	-7.98968	-5.43035	-7.9437	NA	-5.66653	-5.1655	-3.05877	8.49316	-7.9437	2.01096027611692e-17	Spleen	0.0022225	Skin_Sun_Exposed_Lower_leg	12.2407	2.70653768638698e-17	0.462439	-7.98968	8.49316	3
EXOC3L2	ENSG00000283632.2	8.55750455882956e-15	3	3	0	3	-	-3.837	3.60952	-3.837	NA	-0.623326	NA	NA	NA	NA	NA	NA	NA	-3.14539	NA	NA	NA	NA	NA	-7.74228	NA	9.76492740610577e-15	Spleen	0.533071	Brain_Anterior_cingulate_cortex_BA24	1.4501	0.527267	0.527267	-7.74228	-0.623326	3
ZNF652	ENSG00000198740.8	1.51729796223783e-14	6	4	3	3	NA	-0.780489	2.83186	NA	2.15984	NA	NA	NA	-2.02883	NA	NA	2.15984	NA	NA	NA	NA	NA	0.243902	-5.05784	-2.15984	NA	4.24030135253366e-07	Skin_Sun_Exposed_Lower_leg	0.807307	Skin_Not_Sun_Exposed_Suprapubic	3.21079	2.3502641518917e-18	0.124801	-5.05784	2.15984	4
SLC24A4	ENSG00000140090.17	2.57872997011868e-14	15	5	10	5	+	-0.0624478	2.93228	1.44132	1.57885	1.45669	1.45669	-0.586941	-0.462665	1.45669	NA	NA	1.45669	1.34922	1.5458	1.51385	-0.462665	1.29213	1.30653	-5.68124	-8.15636	3.45263230985015e-16	Whole_Blood	0.643605	Brain_Substantia_nigra	7.50848	1.07235811379274e-18	0.333221	-8.15636	1.57885	5
PICALM	ENSG00000073921.17	3.75444748362101e-14	14	4	13	1	+	4.65538	2.78303	5.21953	7.28014	NA	NA	7.28014	3.3296	NA	7.28014	3.78441	-2.67856	4.62745	7.28014	3.3296	7.28014	2.15066	5.80581	3.90338	4.52226	3.33469401061397e-13	Brain_Cerebellar_Hemisphere	0.0315031	Skin_Not_Sun_Exposed_Suprapubic	7.95047	3.00523121783528e-17	0.59226	-2.67856	7.28014	4
RP11-385F7.1	ENSG00000270761.1	5.10102815266952e-14	15	2	0	15	-	-5.94008	1.07376	-5.94008	-6.46753	-6.46753	-3.82828	-6.46753	-6.16391	-6.60673	-6.46753	NA	-6.11869	-6.46753	-3.69998	-6.46753	-6.46753	-4.14375	-6.65854	-6.60857	NA	2.76560160337488e-11	Skin_Sun_Exposed_Lower_leg	0.000215619	Brain_Putamen_basal_ganglia	14.2693	2.61676348398273e-17	0.51054	-6.65854	-3.69998	2
CD2AP	ENSG00000198087.7	4.69359463819999e-13	12	4	11	1	+	3.5236	2.13445	3.87917	NA	6.46753	NA	-0.387734	3.03569	4.56479	NA	4.56479	NA	0.718627	0.718627	5.60903	NA	4.56479	4.56479	3.17018	4.69206	9.96182317708649e-11	Brain_Anterior_cingulate_cortex_BA24	0.698213	Brain_Cerebellar_Hemisphere	6.98654	7.74496751470378e-18	0.429824	-0.387734	6.46753	4
CASS4	ENSG00000087589.16	5.71994741024372e-12	17	5	6	11	NA	-2.8244	5.54406	NA	-6.37922	-7.22795	-5.43532	0.601641	2.0271	-6.37018	-7.39774	-6.37922	-6.37922	-4.54127	-7.39774	-7.39774	-7.39774	4.49465	7.74026	2.0271	7.39774	9.92159133208724e-15	Skin_Sun_Exposed_Lower_leg	0.547413	Brain_Cerebellar_Hemisphere	11.3765	4.12626211016834e-17	0.398264	-7.39774	7.74026	5
HLA-DRB5	ENSG00000198502.5	1.93946300047852e-11	6	4	5	1	+	2.60455	1.93339	3.27816	NA	NA	NA	NA	NA	2.78783	NA	NA	NA	NA	3.8489	NA	1.69398	3.37014	-0.763495	NA	4.68998	2.73230440648348e-06	Whole_Blood	0.445168	Skin_Sun_Exposed_Lower_leg	2.7061	0.0189744	0.271331	-0.763495	4.68998	4
PTK2B	ENSG00000120899.17	2.9815016824103e-11	11	4	6	5	NA	0.723742	1.99422	NA	NA	0.227094	-0.0806267	0.441037	0.265752	NA	NA	NA	-0.0514734	NA	0.227094	-0.0806267	-0.0806267	0.441037	-0.0514734	NA	6.70397	2.02827816500638e-11	Whole_Blood	0.958948	Brain_Hypothalamus	8.49282	5.48612539303532e-17	0.566546	-0.0806267	6.70397	4
CSTF1	ENSG00000101138.11	5.34859514713194e-11	16	5	16	0	+	2.94658	2.45259	2.94658	NA	0.688492	5.0091	0.688492	0.688492	5.65348	5.65348	0.684843	0.447644	5.05976	5.06004	0.180043	0.678404	5.00119	4.86612	0.688492	6.09724	1.07915319443342e-09	Whole_Blood	0.857119	Brain_Spinal_cord_cervical_c-1	6.89388	2.03198789027216e-17	0.303574	0.180043	6.09724	5
BTNL2	ENSG00000204290.10	1.67379599068818e-10	10	7	9	1	+	3.77948	2.72386	4.30749	NA	NA	5.98168	NA	6.06155	6.48566	2.21398	4.63676	-0.972639	5.16931	6.24652	0.996771	NA	NA	NA	0.975215	NA	8.83471173608567e-11	Brain_Cortex	0.330733	Brain_Hypothalamus	4.09547	0.0179238	0.154717	-0.972639	6.48566	7
BCL3	ENSG00000069399.14	1.81755892648884e-10	2	2	0	2	-	-5.90129	1.06938	-5.90129	NA	NA	NA	NA	NA	NA	NA	NA	NA	NA	NA	NA	NA	-6.65746	-5.14513	NA	NA	2.78602595838404e-11	Skin_Not_Sun_Exposed_Suprapubic	2.67340824670611e-07	Skin_Sun_Exposed_Lower_leg	1.69371	0.306293	0.306293	-6.65746	-5.14513	2
RIN3	ENSG00000100599.15	2.15315512517523e-10	17	6	2	15	-	-1.90893	1.84317	-2.42714	-2.43354	-2.43354	-2.43354	2.793	-0.874859	-1.74715	-1.75556	-2.43354	-2.43354	-2.43354	-6.00246	-2.43354	-2.43354	-3.16149	-0.963808	-2.43354	1.16241	1.94354493142817e-09	Brain_Putamen_basal_ganglia	0.381651	Brain_Cerebellum	9.17364	3.3655962106027e-18	0.491729	-6.00246	2.793	6
HLA-DQA2	ENSG00000237541.3	2.32272397778981e-10	15	5	0	15	-	-4.75674	1.55907	-4.75674	-5.57962	NA	-4.47416	-3.96874	-4.81257	-4.24835	-3.34752	-2.19845	NA	-7.35312	-2.62967	-4.14216	-5.66176	-7.28882	-6.33769	-3.54394	-5.76449	1.9363178624337e-13	Brain_Nucleus_accumbens_basal_ganglia	0.0279174	Brain_Hippocampus	9.39764	0.010821	0.639647	-7.35312	-2.19845	5
CD33	ENSG00000105383.14	4.40434782732037e-10	16	4	16	0	+	4.07575	1.9592	4.07575	5.01169	0.682002	1.55885	5.01537	5.01668	0.682002	5.01253	6.82683	5.01337	0.682002	5.0119	5.01521	5.01521	NA	5.01521	5.01169	4.6414	8.6812069118752e-12	Brain_Hippocampus	0.495238	Brain_Anterior_cingulate_cortex_BA24	11.1689	2.32628599799749e-17	0.538687	0.682002	6.82683	4
RP11-138I18.2	ENSG00000271046.1	4.6416317923549e-10	5	5	3	2	NA	1.80826	2.95079	NA	NA	NA	NA	NA	NA	NA	1.72102	NA	NA	NA	NA	6.60357	1.9588	NA	NA	-0.612641	-0.629471	4.01368806355217e-11	Brain_Spinal_cord_cervical_c-1	0.540114	Spleen	2.14925	0.152478	0.152478	-0.629471	6.60357	5
APH1B	ENSG00000138613.13	8.70932844829788e-10	15	3	14	1	+	5.27329	2.44768	5.78736	1.15617	-1.92366	6.43691	6.43691	6.43691	4.64575	6.43691	6.43691	NA	NA	6.43691	6.43691	6.43691	4.66824	6.18376	6.43691	6.43691	1.21932355630225e-10	Brain_Caudate_basal_ganglia	0.24761	Brain_Amygdala	12.6632	4.70872868903136e-18	0.982005	-1.92366	6.43691	3
SCARA3	ENSG00000168077.13	9.13732420158405e-10	13	7	9	4	+	0.388922	3.19414	2.17032	NA	1.4225	0.411344	2.70394	-5.07645	NA	-0.312038	2.79177	NA	0.652597	2.91741	-5.48005	-3.60836	1.7151	2.37041	4.5478	NA	4.25215935525127e-08	Brain_Spinal_cord_cervical_c-1	0.755012	Brain_Frontal_Cortex_BA9	5.82928	4.72351603775757e-17	0.254823	-5.48005	4.5478	7
NUP160	ENSG00000030066.13	9.13927219849374e-10	5	4	0	5	-	-2.96322	1.87357	-2.96322	NA	NA	NA	NA	NA	NA	NA	-1.8178	NA	NA	NA	NA	NA	-6.18416	-3.05394	-1.8801	-1.8801	6.24337387961212e-10	Skin_Not_Sun_Exposed_Suprapubic	0.0690952	Brain_Hippocampus	2.59842	2.46519032881566e-32	0.155713	-6.18416	-1.8178	4
GEMIN7	ENSG00000142252.10	1.64653700874733e-09	16	2	16	0	+	5.95291	1.40952	5.95291	6.3744	6.00762	6.3744	0.690521	6.3744	6.3744	6.3744	6.3744	5.98705	6.3744	6.16653	6.3744	6.3744	6.3744	6.3744	6.2764	NA	1.8368045156227e-10	Brain_Amygdala	0.489867	Brain_Cerebellar_Hemisphere	14.9327	5.58500042153474e-17	0.816768	0.690521	6.3744	2
HLA-DQA1	ENSG00000196735.11	1.94026012651605e-09	16	5	12	4	+	1.04409	2.90777	2.24734	4.30217	4.3611	4.3611	-0.119743	1.24724	1.52721	0.532261	-7.61389	0.92135	1.21411	2.46423	1.48221	NA	-0.438384	2.14549	2.40959	-2.09062	2.65971734003659e-14	Brain_Hippocampus	0.904687	Brain_Cerebellar_Hemisphere	10.4931	1.2287860478217e-16	0.547355	-7.61389	4.3611	5
ERCC2	ENSG00000104884.14	2.2208986139297e-09	9	4	9	0	+	4.75575	1.74854	4.75575	NA	5.20382	NA	NA	NA	NA	5.20382	NA	5.13599	0.60601	NA	5.13599	5.20382	6.10728	6.56542	3.63961	NA	5.1885598434107e-11	Skin_Sun_Exposed_Lower_leg	0.544508	Brain_Nucleus_accumbens_basal_ganglia	6.10752	1.30579994042982e-17	0.251111	0.60601	6.56542	4
NDUFS2	ENSG00000158864.12	2.28951077851759e-09	17	4	0	17	-	-4.66614	1.02684	-4.66614	-6.28478	-4.04648	-4.68955	-4.04648	-6.13425	-4.62111	-3.02364	-6.12001	-5.01713	-4.64537	-5.54408	-5.2724	-4.04648	-4.24208	-5.12711	-3.65562	-2.80777	3.2832562291924e-10	Brain_Amygdala	0.00498859	Whole_Blood	12.7445	2.54504662767322e-17	0.437594	-6.28478	-2.80777	4
SCIMP	ENSG00000161929.14	2.83374351070426e-09	17	4	17	0	+	3.23904	2.02886	3.23904	5.06251	0.00872969	5.86357	1.95991	2.37798	3.45784	1.68418	5.83663	5.83663	2.19957	0.00872969	1.23295	5.70248	3.30187	1.67903	4.50582	4.34528	4.53015755787562e-09	Brain_Caudate_basal_ganglia	0.993035	Brain_Putamen_basal_ganglia	7.80917	3.90423138108483e-18	0.653053	0.00872969	5.86357	4
FAM180B	ENSG00000196666.4	2.94942238976494e-09	16	5	0	16	-	-3.26057	1.66207	-3.26057	-0.716452	-2.83572	-4.79468	-5.04449	-4.65428	-4.65428	-4.7956	-0.716452	-3.80274	-4.79468	-4.72958	-2.83572	-2.83572	-1.049	-3.1933	-0.716452	NA	4.54733084235178e-07	Brain_Cerebellar_Hemisphere	0.473712	Brain_Hippocampus	8.59755	3.30777296499102e-17	0.296337	-5.04449	-0.716452	5
B4GALT3	ENSG00000158850.14	3.27739277799844e-09	15	4	10	5	+	-0.859205	2.82097	0.856697	4.83729	0.144268	0.144268	-4.13116	-4.50139	0.144268	NA	0.144268	2.57554	0.144268	0.144268	NA	0.144268	-4.58693	-4.08022	0.144268	-4.15535	1.3162236045656e-06	Brain_Amygdala	0.885289	Brain_Anterior_cingulate_cortex_BA24	10.2523	8.08162445089077e-17	0.624698	-4.58693	4.83729	4
GATS	ENSG00000239521.7	3.29784811642559e-09	14	5	7	7	NA	-1.6377	2.66801	NA	NA	0.618286	-4.1901	NA	-6.35314	-0.0381603	NA	-4.40269	-5.38617	0.618286	0.0349243	0.5044	-4.57409	0.618286	-1.0308	0.0349243	0.618286	2.10969605558057e-10	Brain_Cerebellum	0.97214	Brain_Putamen_basal_ganglia	5.38272	1.97093254515052e-17	0.263751	-6.35314	0.618286	5
TAS2R60	ENSG00000185899.1	4.45664501413976e-09	2	2	0	2	-	-3.23985	4.02335	-3.23985	NA	NA	NA	NA	NA	NA	NA	NA	NA	NA	NA	NA	NA	NA	-0.394907	NA	-6.08479	1.16644968334855e-09	Whole_Blood	0.692912	Skin_Sun_Exposed_Lower_leg	1.13016	0.869835	0.869835	-6.08479	-0.394907	2
FCER1G	ENSG00000158869.10	5.21060162688331e-09	15	5	0	15	-	-4.13677	1.86922	-4.13677	NA	-0.616096	NA	-2.58494	-2.41331	-4.88531	-4.71765	-2.41331	-5.4414	-5.12711	-5.4414	-5.1351	-0.616096	-5.75663	-5.70513	-5.33707	-5.86096	4.60186085568654e-09	Whole_Blood	0.537831	Brain_Anterior_cingulate_cortex_BA24	9.35804	1.61793054806279e-17	0.368595	-5.86096	-0.616096	5
RAPSN	ENSG00000165917.9	6.17742794629637e-09	16	3	13	3	+	1.72696	1.88553	2.24311	4.89211	1.01903	4.14168	1.01903	1.05419	1.82772	1.05419	4.82571	1.05419	1.50705	4.72748	NA	1.01903	-0.242181	-0.232758	1.01903	-1.05419	9.97612082368187e-07	Brain_Amygdala	0.815949	Skin_Sun_Exposed_Lower_leg	11.6211	1.03526771857092e-19	0.528543	-1.05419	4.89211	3
SLC39A13	ENSG00000165915.13	7.32867809854477e-09	16	3	1	15	-	-4.06152	2.08458	-4.43338	NA	-4.99573	-6.01303	-4.22082	-4.22082	-4.99573	-4.99573	-4.99573	-5.37767	-4.99573	-4.99573	-4.99573	-4.99573	-0.712196	-0.994539	-4.99573	1.51626	1.82088333299889e-09	Brain_Caudate_basal_ganglia	0.476344	Skin_Not_Sun_Exposed_Suprapubic	12.0867	9.35860748722576e-18	0.553783	-6.01303	1.51626	3
GPC2	ENSG00000213420.7	1.34699353418474e-08	17	7	15	2	+	2.35413	2.65932	2.978	4.11776	1.19174	5.11879	5.54481	5.30539	1.19174	0.643232	-1.25363	2.41979	3.40091	3.45869	0.381366	0.654	5.4241	5.4241	0.393631	-3.39624	2.94270781809705e-08	Brain_Cerebellar_Hemisphere	0.702931	Brain_Spinal_cord_cervical_c-1	7.32538	4.0262200376642e-19	0.334366	-3.39624	5.54481	7
PSMC3	ENSG00000165916.8	1.3758359063209e-08	17	3	4	13	-	-1.06015	1.50531	-1.6739	-1.53667	-1.8566	1.31609	-0.629049	-2.01681	-1.76692	-1.92223	1.18856	1.18856	-1.16117	-0.90566	-4.92684	-1.78077	-0.683961	0.0447885	-0.88673	-1.68723	8.35714284138102e-07	Brain_Spinal_cord_cervical_c-1	0.964276	Skin_Sun_Exposed_Lower_leg	15.4023	2.71442275250051e-17	0.556165	-4.92684	1.31609	3
HLA-DRB1	ENSG00000196126.11	1.59339407973482e-08	11	5	10	1	+	3.95516	2.18652	4.41495	NA	NA	0.421437	NA	6.44954	4.90191	3.90946	NA	4.66335	6.22189	4.91068	4.66335	NA	3.9801	4.02783	-0.642803	NA	1.12187574791291e-10	Brain_Cerebellum	0.673436	Brain_Caudate_basal_ganglia	6.74411	1.81379182190671e-17	0.238704	-0.642803	6.44954	5
CLASRP	ENSG00000104859.14	2.08935418006131e-08	1	1	1	0	+	5.60443	NA	5.60443	NA	NA	5.60443	NA	NA	NA	NA	NA	NA	NA	NA	NA	NA	NA	NA	NA	NA	2.0893541800613e-08	Brain_Caudate_basal_ganglia	2.0893541800613e-08	Brain_Caudate_basal_ganglia	1	1	1	5.60443	5.60443	1
RP11-30K9.6	ENSG00000245975.2	2.56243341159799e-08	16	2	0	16	-	-4.95915	0.654204	-4.95915	-4.47136	-4.47136	-5.90838	-4.47136	-5.8871	-5.78478	-4.47136	-5.63462	-5.61971	-5.79818	-4.47136	-4.47136	-4.47136	-4.47136	-4.47136	-4.47136	NA	3.45480005668702e-09	Brain_Caudate_basal_ganglia	7.77240052930552e-06	Brain_Cerebellar_Hemisphere	15.0623	4.47522242110898e-17	0.937626	-5.90838	-4.47136	2
SRRM5	ENSG00000226763.4	2.63937802184225e-08	12	4	9	3	+	-0.113871	2.42621	1.05545	NA	NA	0.0208904	-2.85279	NA	1.8439	2.9856	NA	-5.15995	0.527194	NA	0.0208904	-2.85279	2.85279	1.12376	0.0208904	0.103164	2.47016094885406e-07	Brain_Hypothalamus	0.983333	Brain_Caudate_basal_ganglia	5.6139	1.21356802085709e-17	0.969141	-5.15995	2.9856	4
MINDY2	ENSG00000128923.10	3.33633546146282e-08	17	4	5	12	-	-1.72403	3.33518	-3.57871	-4.47136	-4.47136	-4.47136	4.47136	4.47136	-4.47136	-4.02868	1.31264	-0.998369	-0.769051	-1.50145	1.30302	-4.47136	-4.47136	-3.44429	2.07763	-5.37455	7.67761784864211e-08	Whole_Blood	0.441863	Brain_Nucleus_accumbens_basal_ganglia	11.0045	2.65102665025836e-18	0.674148	-5.37455	4.47136	4
HLA-DRA	ENSG00000204287.13	3.42315141097124e-08	9	5	7	2	+	2.901	2.84926	4.05237	NA	4.62057	5.55276	2.33615	NA	1.45047	NA	NA	2.33615	6.24757	5.82293	-1.12877	NA	NA	NA	-1.12877	NA	4.16897545592154e-10	Brain_Nucleus_accumbens_basal_ganglia	0.258993	Brain_Spinal_cord_cervical_c-1	3.96449	1.40689185724449e-19	0.276481	-1.12877	6.24757	5
ADAM10	ENSG00000137845.14	4.04546755284473e-08	17	6	13	4	+	2.24228	3.34258	3.81723	1.92932	2.02982	4.67189	2.38315	1.18482	3.01269	1.92932	6.42139	6.11243	4.18151	4.9286	6.10614	4.73288	-2.81003	-3.4466	-3.3599	-1.8886	1.35032324184786e-10	Brain_Hippocampus	0.23609	Brain_Cerebellum	8.97931	7.77308700452316e-17	0.41405	-3.4466	6.42139	6
ERCC1	ENSG00000012061.15	5.01412011096406e-08	11	5	0	11	-	-3.24637	0.861383	-3.24637	-5.2345	-3.5404	-2.62225	NA	-3.11603	-1.57125	NA	NA	NA	NA	-3.5404	-3.11603	NA	-3.3476	-3.38952	-3.11603	-3.11603	1.65429570929192e-07	Brain_Amygdala	0.116123	Brain_Cortex	6.07865	5.4082349969824e-17	0.33487	-5.2345	-1.57125	5
RP11-333E1.2	ENSG00000263164.1	5.9752650519302e-08	14	3	8	6	NA	0.617648	2.40335	NA	5.71323	-2.29959	1.77495	-2.29959	0.946628	1.15527	1.22907	-2.29959	-2.29959	NA	NA	NA	2.97849	-0.131507	3.03754	-0.128315	1.27008	1.10854092463343e-08	Brain_Amygdala	0.8979	Spleen	10.3876	1.11085829128909e-17	0.75404	-2.29959	5.71323	3
SPI1	ENSG00000066336.11	8.1020909946106e-08	15	2	14	1	+	2.8555	2.66323	3.45209	5.65854	1.88522	2.56495	-5.49685	2.56495	4.73328	2.56495	5.02344	NA	4.85067	2.56495	2.56495	2.56495	2.56495	5.65854	2.56495	NA	1.52663795414233e-08	Skin_Sun_Exposed_Lower_leg	0.0593997	Brain_Anterior_cingulate_cortex_BA24	11.8035	2.30651828069935e-17	3.01862	-5.49685	5.65854	2
RTFDC1	ENSG00000022277.12	8.1224749464286e-08	6	2	6	0	+	2.59328	1.70864	2.59328	NA	NA	NA	2.40465	NA	2.40465	0.308735	NA	NA	NA	5.63234	NA	NA	2.40465	2.40465	NA	NA	1.77783752913124e-08	Brain_Putamen_basal_ganglia	0.757523	Brain_Frontal_Cortex_BA9	5.10003	2.17829612693781e-16	0.877269	0.308735	5.63234	2
CNN2	ENSG00000064666.14	9.5344210773756e-08	17	6	9	8	NA	0.185655	1.93765	NA	0.735984	-1.36684	2.80284	0.0433763	-0.772106	1.61266	-0.136235	-1.74801	1.30475	0.939392	1.88511	0.20985	-1.74801	-0.331575	-3.95221	4.32761	-0.650443	1.50739301602107e-05	Spleen	0.965402	Brain_Cerebellar_Hemisphere	10.7374	4.87424006168625e-18	0.464381	-3.95221	4.32761	6
AGFG2	ENSG00000106351.12	1.12667711601265e-07	17	3	17	0	+	1.9557	1.5052	1.9557	1.49653	1.49653	1.49653	5.90792	5.89678	1.49653	1.49653	1.49653	1.49653	1.49653	0.490656	1.49653	1.49653	1.49653	1.49653	1.49653	1.49653	3.46454661264078e-09	Brain_Cerebellar_Hemisphere	0.62367	Brain_Putamen_basal_ganglia	14.5163	2.61678143731763e-17	0.614686	0.490656	5.90792	3
FAM209A	ENSG00000124103.8	1.19598214435628e-07	5	2	1	4	-	-1.4515	2.10486	-2.39272	NA	NA	NA	2.31336	NA	NA	NA	NA	NA	NA	NA	NA	NA	-2.37453	-2.37453	-2.37453	-2.44728	0.0143938	Whole_Blood	0.0207026	Brain_Cerebellar_Hemisphere	4.46825	4.26277225896731e-19	0.512471	-2.44728	2.31336	2
FAM209B	ENSG00000213714.1	1.46775109083079e-07	13	2	13	0	+	0.546134	1.10659	0.546134	NA	0.23922	0.23922	0.23922	0.23922	0.23922	0.23922	NA	NA	0.23922	0.23922	NA	0.23922	0.23922	4.2291	0.23922	0.23922	2.3463064859609e-05	Skin_Sun_Exposed_Lower_leg	0.810935	Brain_Caudate_basal_ganglia	12.4949	1.13533875052051e-17	0.505065	0.23922	4.2291	2
CNPY4	ENSG00000166997.7	1.71253825136e-07	12	5	0	12	-	-1.78641	1.5287	-1.78641	NA	-4.7903	NA	NA	NA	-1.89232	-1.89232	-1.0232	-1.813	-4.66283	-1.89232	-0.807257	NA	-0.123376	-0.123376	-0.645401	-1.77123	1.66534603900084e-06	Brain_Anterior_cingulate_cortex_BA24	0.90181	Skin_Not_Sun_Exposed_Suprapubic	6.30262	2.24235590927828e-17	0.352994	-4.7903	-0.123376	5
GRIN3B	ENSG00000116032.5	1.92322546693277e-07	14	7	4	10	-	-0.792423	1.86165	-1.64764	0.757432	-1.1449	NA	-1.40881	-3.02968	0.957279	-0.626328	NA	NA	-3.78293	-3.70478	-1.72552	2.51371	-0.0761615	-0.075326	1.15407	-0.901965	0.000154993	Brain_Nucleus_accumbens_basal_ganglia	0.939955	Skin_Sun_Exposed_Lower_leg	7.87879	0.00246896	0.30451	-3.78293	2.51371	7
STAG3	ENSG00000066923.17	2.06202320752801e-07	17	4	4	13	-	-3.50972	2.55014	-4.73809	-5.30539	-5.30539	-5.35008	0.618286	-5.07644	-3.76712	-5.30539	-5.30539	-6.18391	-5.45792	-3.77422	-4.46179	-5.30539	-0.996748	0.50991	0.40811	0.393631	6.25332594276922e-10	Brain_Hypothalamus	0.693854	Whole_Blood	12.0974	1.91828100030956e-17	0.883403	-6.18391	0.618286	4
IRGQ	ENSG00000167378.8	2.66427400290159e-07	17	6	14	3	+	0.772106	2.58411	1.81358	-5.44014	1.8134	1.93435	1.95442	1.8439	0.417388	-1.30479	1.77589	2.17518	0.27423	1.8702	-5.51935	2.49933	1.95442	1.84239	3.78181	1.25318	3.40249881143704e-08	Brain_Spinal_cord_cervical_c-1	0.783908	Brain_Nucleus_accumbens_basal_ganglia	6.75175	2.82254551517698e-17	0.555766	-5.51935	3.78181	6
GRN	ENSG00000030582.17	2.91728997775283e-07	14	4	2	12	-	-4.11226	2.62086	-4.98177	1.76849	-5.64699	-5.64699	-5.64699	-5.64699	-5.3004	-5.28716	NA	-0.545934	-5.66424	-5.47608	-5.60412	-5.64699	-3.6684	NA	NA	0.441141	1.47680920808692e-08	Brain_Nucleus_accumbens_basal_ganglia	0.659111	Whole_Blood	10.046	2.0293924162174e-17	0.475451	-5.66424	1.76849	4
DMWD	ENSG00000185800.11	3.12507645894834e-07	10	4	10	0	+	4.2067	0.806205	4.2067	NA	NA	4.4092	3.04994	3.54261	NA	NA	NA	NA	NA	4.4092	4.4092	4.4092	5.06746	4.4092	2.93082	5.43013	5.63123926941771e-08	Whole_Blood	0.00338072	Spleen	8.35346	2.08035152610975e-18	0.329887	2.93082	5.43013	4
AXL	ENSG00000167601.11	3.35666500613082e-07	12	5	3	9	-	-0.480113	1.63574	-1.25791	NA	2.65637	-1.1096	-0.884627	-0.465142	NA	-3.39006	NA	-1.15344	-0.799579	-1.1096	NA	NA	2.13475	-0.914675	0.768727	-1.49448	0.000698779	Brain_Frontal_Cortex_BA9	0.64183	Brain_Cerebellum	7.41506	2.03315095627968e-17	0.405978	-3.39006	2.65637	5
C7orf43	ENSG00000146826.16	3.5827860462174e-07	15	2	2	13	-	-2.56311	2.92683	-3.65609	-3.77716	-3.77716	-3.77716	-3.77716	-3.77716	-3.77716	-3.77716	-3.77716	-3.77716	-3.77716	-3.77716	3.77716	NA	5.30539	NA	-3.77716	-2.20327	1.1242978007298e-07	Skin_Not_Sun_Exposed_Suprapubic	0.0275755	Whole_Blood	13.9833	1.23046056740448e-17	0.748587	-3.77716	5.30539	2
BLOC1S3	ENSG00000189114.6	3.63251014523689e-07	15	4	13	2	+	1.78839	1.37241	2.13897	1.22479	2.44346	2.07578	NA	2.07578	1.08339	1.06325	2.07578	2.9922	2.07578	NA	2.07578	-0.490336	-0.490336	4.712	0.585051	3.3235	2.45294869790666e-06	Skin_Sun_Exposed_Lower_leg	0.623896	Brain_Substantia_nigra	10.9156	5.12223367433708e-17	0.381209	-0.490336	4.712	4
ACE	ENSG00000159640.15	3.78700150424572e-07	17	1	1	16	-	-4.33413	2.54047	-4.94589	-5.08926	-5.08926	-4.93097	-5.08926	-4.93097	-5.08926	-4.93097	-5.08926	-4.93097	-5.08926	5.45399	-4.93097	-4.93097	-5.49752	-4.93097	-3.98834	-4.59609	3.851604065969e-08	Skin_Not_Sun_Exposed_Suprapubic	6.65372168829208e-05	Spleen	16.2991	1.39634857201649e-17	16.2991	-5.49752	5.45399	1
GCNT7	ENSG00000124091.9	3.85052025852277e-07	11	3	6	5	NA	0.703703	1.82572	NA	NA	NA	-0.301898	5.69727	0.301898	-0.301898	0.301898	NA	NA	0.301898	NA	0.301898	NA	-0.301898	-0.301898	-0.301898	2.34536	1.21741450593828e-08	Brain_Cerebellar_Hemisphere	0.76273	Brain_Frontal_Cortex_BA9	9.02866	1.08917277004552e-18	0.503198	-0.301898	5.69727	3
PITPNA	ENSG00000174238.14	6.5409946173198e-07	16	5	14	2	+	1.83431	1.64281	2.31737	2.26882	2.26882	NA	0.527121	-0.894186	1.00755	3.18862	2.26882	-2.20005	2.26882	2.26882	2.26882	2.26882	0.89784	3.5263	4.18641	3.2277	2.83405540044108e-05	Spleen	0.59811	Brain_Cerebellar_Hemisphere	10.6861	2.45545666324023e-17	0.464646	-2.20005	4.18641	5
ACP2	ENSG00000134575.9	7.37626075436106e-07	17	3	7	10	NA	-0.761092	1.52694	NA	-0.194385	-4.62392	-2.83689	0.329375	-2.00615	-0.194385	0.500793	0.494475	0.504342	0.467093	0.491063	0.459997	-3.04593	-1.01379	-0.608099	-0.968181	-0.693962	3.76556941283375e-06	Brain_Anterior_cingulate_cortex_BA24	0.845874	Brain_Amygdala	14.3338	1.45336306641317e-19	1.00382	-4.62392	0.504342	3
RP11-521O16.2	ENSG00000260163.1	7.56231775439599e-07	13	2	13	0	+	2.16029	1.30009	2.16029	1.71419	1.11559	1.71419	1.71419	2.82339	2.26649	1.38148	0.840771	1.48445	1.71419	1.56602	5.03927	4.7095	NA	NA	NA	NA	4.6730520526473e-07	Brain_Spinal_cord_cervical_c-1	0.400476	Brain_Hippocampus	10.9079	2.29977100838188e-17	1.94397	0.840771	5.03927	2
SLTM	ENSG00000137776.16	9.15001532873542e-07	17	5	11	6	NA	0.546074	2.86043	NA	-1.28055	3.4867	-3.39529	0.939237	2.58415	-3.88612	2.55178	-3.39529	2.64184	2.61448	2.66626	3.84976	2.76637	1.71822	1.79377	-2.97675	-3.39529	0.000101858	Brain_Cortex	0.347609	Brain_Cerebellar_Hemisphere	9.9555	3.72761205195533e-18	0.339077	-3.88612	3.84976	5
CHRNA2	ENSG00000120903.12	9.64291817668159e-07	15	6	12	3	+	-0.0612478	2.26923	0.809447	0.572825	-6.03687	-2.2976	0.195053	0.522216	0.158952	0.451611	4.7432	0.538923	0.538923	NA	0.301699	NA	0.253596	-2.2976	0.639106	0.797263	1.57128029432059e-09	Brain_Anterior_cingulate_cortex_BA24	0.873707	Brain_Cortex	9.23062	3.63624120782735e-17	0.359151	-6.03687	4.7432	6
TSC22D4	ENSG00000166925.8	1.02051425071182e-06	17	3	13	4	+	-0.285819	1.35404	0.35988	0.0969159	0.120538	-1.68694	0.161473	0.13236	0.146769	1.73558	1.73558	0.0951365	0.139684	0.0881029	0.0343926	-1.73558	-3.06346	-3.0514	0.103803	0.0881029	0.00218795	Skin_Not_Sun_Exposed_Suprapubic	0.972564	Brain_Spinal_cord_cervical_c-1	13.235	1.21141320195788e-18	0.747503	-3.06346	1.73558	3
HLA-B	ENSG00000234745.10	1.04250733407412e-06	15	9	2	13	-	-2.05669	1.80003	-2.56128	-4.70612	NA	-1.89838	-2.58334	-1.53938	-1.73103	-3.12766	-3.0384	-4.25014	-1.4452	-2.79084	-4.27117	NA	0.634078	-0.56894	-1.346	1.81222	2.52472977038741e-06	Brain_Amygdala	0.569397	Skin_Sun_Exposed_Lower_leg	6.78943	0.0207941	0.280493	-4.70612	1.81222	9
TMC3	ENSG00000188869.12	1.1394575126208e-06	9	4	5	4	NA	0.364089	2.01763	NA	NA	1.80235	NA	-0.534257	-1.80235	0.150607	3.29514	NA	NA	NA	NA	3.29514	NA	-2.02583	-1.05461	0.150607	NA	0.000983723	Brain_Frontal_Cortex_BA9	0.880286	Brain_Cortex	6.5249	6.91059772194796e-17	0.332889	-2.02583	3.29514	4
HLA-DQB2	ENSG00000232629.8	1.50565099986551e-06	17	5	1	16	-	-3.12183	1.35437	-3.34441	-4.17429	0.439499	-4.14216	-3.70514	-2.21427	-1.94681	-2.8746	-4.10558	-4.17429	-4.27202	-4.16238	-4.14216	-1.3215	-2.95563	-1.93996	-2.95563	-4.42416	9.6820416859871e-06	Whole_Blood	0.6603	Brain_Anterior_cingulate_cortex_BA24	12.1297	2.59092311390156e-17	0.439971	-4.42416	0.439499	5
RP11-543C4.1	ENSG00000247970.2	1.65214185568428e-06	16	6	9	7	NA	0.836365	1.4903	NA	-0.388239	-0.388239	0.506564	2.85622	0.506768	-0.731803	-0.421553	2.85622	-0.388239	0.997821	2.85299	0.511181	-0.388239	2.85081	2.88138	-0.731803	NA	0.00395933	Skin_Sun_Exposed_Lower_leg	0.697839	Brain_Anterior_cingulate_cortex_BA24	8.34577	9.81819547076397e-20	0.335536	-0.731803	2.88138	6
PVRIG	ENSG00000213413.2	1.72762800717104e-06	14	5	3	11	-	-3.63148	3.02051	-5.02994	0.57741	-3.29292	-5.88429	-5.02477	-5.50518	-6.0187	-2.40287	-4.86739	NA	0.618286	-5.3204	-5.50055	-6.01172	NA	-5.50055	3.29292	NA	1.75827153167484e-09	Brain_Cortex	0.563662	Brain_Amygdala	9.59483	4.04336664023384e-17	0.660516	-6.0187	3.29292	5
AKT1	ENSG00000142208.15	2.04821802866318e-06	14	5	13	1	+	1.92057	1.33931	2.23234	NA	NA	1.63438	2.89401	3.02782	2.76135	1.18808	2.56639	1.63438	2.23006	1.20728	1.57247	NA	2.76135	2.68889	-2.1324	2.85392	0.00246328	Brain_Cerebellum	0.234801	Brain_Frontal_Cortex_BA9	6.60635	4.66668018034163e-17	0.39792	-2.1324	3.02782	5
ZNF112	ENSG00000062370.16	2.14773833763758e-06	11	5	10	1	+	1.49458	2.7032	2.1556	NA	1.31291	1.15065	1.84619	-5.11565	5.11565	NA	1.13761	NA	0.504994	NA	NA	2.79289	1.25549	1.32396	5.11565	NA	3.12662855108486e-07	Spleen	0.613563	Brain_Nucleus_accumbens_basal_ganglia	5.22231	7.33112635144106e-17	0.399558	-5.11565	5.11565	5
TMEM106B	ENSG00000106460.18	2.38214473736645e-06	15	5	2	13	-	-3.15038	1.87465	-3.72404	-3.65534	NA	NA	-5.18068	-3.97945	-3.9903	-2.35393	-2.50853	-3.65534	-5.05241	-2.35393	-5.04917	-5.05241	0.984914	0.171894	-1.72831	-3.85278	2.21078622137294e-07	Brain_Cerebellar_Hemisphere	0.863521	Skin_Sun_Exposed_Lower_leg	8.99424	4.89483862846131e-17	0.553335	-5.18068	0.984914	5

## Sheet: Sheet 3
S-MultiXcan results using GTEx data: all tissues
gene_name	ensembl_gene_id	smultixcan_pvalue	n	n_indep	n_pos_dir	n_neg_dir	consensus	z_mean	z_sd	z_concordant_mean	AdiposeSubcutaneous	AdiposeVisceralOmentum	AdrenalGland	ArteryAorta	ArteryCoronary	ArteryTibial	BrainAmygdala	BrainAnteriorcingulatecortexBA24	BrainCaudatebasalganglia	BrainCerebellarHemisphere	BrainCerebellum	BrainCortex	BrainFrontalCortexBA9	BrainHippocampus	BrainHypothalamus	BrainNucleusaccumbensbasalganglia	BrainPutamenbasalganglia	BrainSpinalcordcervicalc1	BrainSubstantianigra	BreastMammaryTissue	CellsCulturedfibroblasts	CellsEBVtransformedlymphocytes	ColonSigmoid	ColonTransverse	EsophagusGastroesophagealJunction	EsophagusMucosa	EsophagusMuscularis	HeartAtrialAppendage	HeartLeftVentricle	KidneyCortex	Liver	Lung	MinorSalivaryGland	MuscleSkeletal	NerveTibial	Ovary	Pancreas	Pituitary	Prostate
APOC1	ENSG00000130208.9	0	17	6	5	12	-	-9.60644	23.066	-21.8728	-6.66307	-34.061	-25.3904	NA	NA	-25.3904	NA	-6.66307	NA	NA	NA	NA	NA	NA	NA	-34.061	NA	6.66307	NA	NA	-4.67851	NA	NA	NA	NA	-25.3904	NA	34.8608	NA	NA	NA	13.9483	34.061	NA	NA	NA	NA	NA	NA
APOE	ENSG00000130203.9	0	33	8	18	15	NA	0.520681	27.9238	NA	33.3565	-32.2064	33.3565	5.91721	NA	NA	32.2064	32.2064	6.66307	NA	NA	NA	-33.3565	32.2064	NA	32.2064	32.2064	NA	32.2064	-34.2948	NA	-33.3565	-32.2064	NA	-32.2064	13.9483	NA	33.3565	-32.2064	-1.17703	7.35367	NA	-32.2064	-6.66307	3.8385	NA	NA	-32.2064	13.9483
NECTIN2	ENSG00000130202.9	0	39	11	10	29	-	-6.42726	15.0649	-13.8404	-19.4575	-8.13737	17.9707	-34.5877	-10.1847	-26.6558	NA	NA	-14.7005	19.1848	NA	NA	-5.34584	-31.4154	NA	-14.7005	19.1848	-5.34584	-7.94724	NA	17.9707	6.90718	-14.7005	-6.54941	-19.1848	-9.95054	-29.5652	6.90718	-6.93306	-3.8017	15.3899	-14.8645	NA	-19.1848	-9.13831	19.5198	17.0827	-7.94724	NA
APOC4	ENSG00000267467.3	1.00012410634728e-225	8	3	5	3	NA	-1.59691	22.26	NA	NA	NA	-25.3904	NA	NA	NA	14.1786	NA	14.1786	NA	NA	NA	NA	NA	NA	-34.061	NA	14.1786	NA	NA	NA	NA	NA	NA	NA	NA	NA	NA	NA	NA	15.3475	NA	NA	NA	NA	-25.3859	NA	NA	NA
TOMM40	ENSG00000130204.12	1.32163267037653e-176	41	4	9	32	-	0.287746	9.56266	-3.77445	1.95909	26.3016	-3.14931	-14.362	-3.14931	-3.14931	-3.14931	-3.14931	-3.14931	-3.14931	-3.14931	29.6496	-3.14931	-3.14931	-3.14931	-3.14931	-3.14931	NA	-3.14931	NA	-11.9412	3.14931	-3.14931	7.58186	1.59995	NA	-3.14931	-3.14931	-3.14931	-3.14931	-3.14931	-3.14931	23.2224	-3.14931	-3.14931	NA	NA	13.8232	25.293
BCAM	ENSG00000187244.10	1.34406787425905e-176	7	5	5	2	+	6.45393	12.0007	12.995	NA	NA	NA	NA	NA	16.251	NA	NA	NA	NA	NA	NA	3.56765	NA	NA	NA	NA	NA	NA	NA	NA	NA	NA	NA	NA	-9.89871	NA	NA	16.251	13.7345	NA	NA	NA	NA	NA	NA	15.1709	NA	NA
CEACAM16	ENSG00000213892.11	6.83132104794145e-112	9	5	7	2	+	0.341676	4.80524	2.40327	NA	NA	3.7835	NA	NA	NA	NA	NA	NA	NA	NA	NA	NA	NA	NA	NA	NA	NA	NA	2.53314	NA	NA	NA	-2.0228	NA	2.53314	NA	NA	NA	NA	2.53314	-11.725	NA	2.53314	NA	NA	1.45341	NA	NA
ZNF296	ENSG00000170684.8	4.29493430241262e-92	46	7	16	30	NA	-2.31519	4.4363	NA	2.44844	-2.73082	0.782565	-6.77827	-2.73082	-2.73082	-6.76819	-2.82714	NA	2.73082	NA	-6.73421	-6.90983	-6.99513	-16.9362	-6.7065	-5.27006	-6.77559	-6.76819	-2.73082	2.50198	-2.73082	2.73082	2.73082	-2.73082	-2.73082	-6.76819	-2.73082	2.73082	-1.83924	-2.73082	-0.267937	2.73082	2.73082	2.73082	2.73082	-6.6192	-6.76819	-6.64154
APOC2	ENSG00000234906.9	1.34310981982629e-68	48	5	38	10	+	3.32658	3.88392	4.82673	-1.4025	5.15761	3.57424	-3.13454	3.35378	3.42775	5.15761	3.57424	8.8772	11.4771	5.20578	7.60711	9.5414	3.57424	3.25681	7.24681	11.0314	-1.40782	5.38322	3.57424	2.47045	-2.1787	3.57424	3.57424	3.10431	5.48576	7.42684	5.15761	3.31321	NA	5.90931	-6.51151	2.57915	6.18301	3.57424	-5.15761	2.5502	-1.7964	-0.99464
CEACAM19	ENSG00000186567.12	7.18976273572837e-65	49	3	48	1	+	14.4699	3.55882	14.8447	13.4306	16.0939	15.7637	16.8053	15.7637	15.286	15.8026	15.7637	15.5901	15.5252	14.4895	14.5446	15.7637	15.7637	15.7637	15.7637	15.7637	15.7637	16.4572	14.9398	14.0569	15.6408	15.2054	16.5137	15.6477	15.7637	15.8572	13.6604	13.8169	15.7637	15.5786	15.7409	15.7978	-3.52447	10.285	16.8973	15.7637	14.9823	16.2854
PVR	ENSG00000073008.14	5.43007157625641e-47	48	6	3	45	-	-6.1221	3.57461	-6.74671	-6.15305	-6.1974	-1.27666	-0.897633	-6.1974	-11.7887	-6.04244	-6.1974	-8.8995	NA	-7.8081	-11.2772	-8.419	-5.90996	-6.27937	-7.76728	-10.7807	-6.15305	-11.0225	-4.05938	-7.4759	-5.06183	-5.90728	-4.52669	-6.15305	-6.15305	-9.48536	-6.15305	-6.938	-9.94374	2.63182	-9.43314	-6.1974	-9.37823	-0.44795	5.61293	-1.27666	-9.88559	-5.86424
CLPTM1	ENSG00000104853.15	1.491357267623e-39	46	4	11	35	-	-4.64721	6.98883	-7.78319	-11.3195	11.3195	-1.46443	11.3195	0.354305	-5.24191	11.3096	11.3096	0.172947	-2.85933	-7.75926	1.06396	-3.40742	-1.06386	4.18452	1.04816	NA	-6.43416	-1.9994	-11.3096	4.18847	-5.35726	-11.3096	-11.3195	NA	-11.3096	-3.77507	-2.85933	-4.78595	-10.412	NA	-13.0566	-11.1743	-5.50399	-9.76468	-2.47313	-11.3195	-11.3096	-9.22362
BIN1	ENSG00000136717.14	3.06062070404462e-37	48	6	8	40	-	-3.70725	4.59075	-5.36902	-7.85638	-5.78127	-2.57236	0.143071	6.2085	-5.6725	-0.467716	-5.4997	-4.66597	-8.10425	-9.1614	-7.97181	-6.5872	-0.963688	-4.19773	-2.24209	0.777174	-8.53093	-0.470823	-6.12656	1.72136	9.91093	-7.91062	-8.62344	-7.87154	-4.82511	-8.71612	-3.65506	-5.39875	NA	-7.3923	4.53059	-3.76097	-7.8199	-3.16938	-5.05287	-7.20714	-7.52825	-4.92521
CTB-129P6.11	ENSG00000267114.1	8.8082964518759e-36	24	3	10	14	NA	-3.46934	5.57459	NA	-11.3096	NA	NA	NA	-3.61544	-0.937325	-2.85933	0.937325	-2.85933	NA	0.937325	NA	NA	NA	-2.85933	-7.53659	NA	-6.03882	NA	2.85933	NA	NA	-7.53659	NA	-11.3096	NA	0.937325	NA	NA	NA	NA	-11.3096	-11.3096	NA	NA	0.937325	NA	NA	NA
EXOC3L2	ENSG00000283632.2	2.33799556293109e-30	14	7	2	12	-	-2.35522	3.33076	-2.85165	NA	NA	-0.623326	NA	0.623326	NA	NA	-0.623326	NA	NA	NA	NA	NA	NA	NA	-3.14539	NA	NA	NA	NA	-2.74758	NA	NA	-7.74228	NA	NA	NA	NA	NA	NA	NA	NA	NA	NA	NA	-0.623326	NA	0.623326	-0.0780211
CLASRP	ENSG00000104859.14	2.72557219986312e-29	3	3	2	1	+	1.31042	8.12876	5.99805	NA	NA	NA	NA	NA	NA	NA	NA	5.60443	NA	NA	NA	NA	NA	NA	NA	NA	NA	NA	NA	NA	NA	NA	NA	NA	NA	NA	NA	NA	NA	NA	NA	NA	NA	NA	NA	NA	NA	-8.06485
TRAPPC6A	ENSG00000007255.10	3.26973892644138e-26	33	3	1	32	-	-2.00872	3.38923	-2.08682	NA	NA	-0.436061	-2.90645	-0.436061	-7.85855	NA	NA	-0.436061	-0.436061	NA	-13.2281	-0.436061	-0.436061	-0.436061	-0.436061	-8.91456	-8.91456	NA	-0.490336	NA	NA	-0.436061	-2.85835	NA	-8.66649	NA	-0.436061	-0.436061	-0.436061	-0.436061	-0.436061	-0.436061	NA	0.490336	-0.436061	-0.436061	-0.436061	NA
MS4A6A	ENSG00000110077.14	6.93237203565961e-26	24	4	23	1	+	9.09093	3.2468	9.54016	10.413	11.0217	NA	10.413	10.413	10.413	NA	4.0475	NA	NA	NA	NA	NA	NA	NA	10.413	NA	NA	NA	10.413	NA	NA	NA	NA	10.413	10.413	NA	11.0217	10.413	NA	10.413	10.413	NA	10.413	NA	10.413	10.413	0.90923	-1.24151
MS4A4E	ENSG00000214787.9	7.65987971944366e-26	30	3	30	0	+	10.0911	1.86836	10.0911	NA	10.5795	10.5795	10.5795	10.5795	10.5795	NA	NA	NA	NA	NA	NA	NA	10.5795	NA	NA	NA	10.5795	10.5795	NA	NA	NA	10.5795	10.5795	10.5795	10.5795	10.5795	10.5795	10.5795	10.5795	3.32794	10.5795	10.5795	10.5795	10.5795	10.5795	10.5795	10.5795	NA
NKPD1	ENSG00000179846.9	9.38806045214577e-25	11	3	10	1	+	2.89618	2.66388	3.35711	NA	NA	NA	NA	NA	NA	NA	NA	NA	NA	NA	1.71315	NA	NA	NA	1.71315	NA	NA	NA	3.24496	NA	NA	NA	NA	NA	NA	3.24496	NA	NA	NA	NA	3.30087	NA	NA	2.16036	NA	NA	1.71315	NA
ABCA7	ENSG00000064687.12	3.3488626817504e-22	49	5	42	7	+	2.13372	2.88632	3.12748	4.33721	3.40161	3.81525	1.52771	2.7642	-0.997011	-1.31341	-7.38156	3.49503	2.27624	2.28958	3.40161	4.07206	1.1707	4.56912	-4.64785	3.14674	3.91471	3.24385	5.18217	-2.96267	4.28973	3.24071	2.22356	5.15095	2.39322	2.44554	2.95539	4.64776	6.91266	-4.64785	0.363904	2.52679	5.73847	3.14808	3.40161	2.46705	1.88337	0.681652
MS4A2	ENSG00000149534.8	2.64924517408496e-21	25	2	0	25	-	-9.10352	1.48064	-9.10352	-9.33041	-9.42153	NA	-9.42153	-9.42153	-9.42153	NA	NA	NA	NA	NA	NA	NA	NA	NA	NA	NA	NA	NA	-9.42153	NA	NA	-9.42153	-9.79207	-9.42153	-9.42153	-9.42153	-2.11517	-9.42153	NA	-9.42153	-9.42153	NA	-9.73089	-9.42153	NA	-9.42153	NA	-9.42153
CR1	ENSG00000203710.10	1.15125901476721e-18	29	7	16	13	NA	3.692	5.96262	NA	NA	-4.92601	NA	NA	-1.24669	-4.92601	8.70755	9.93606	9.83041	NA	NA	9.93606	9.93991	9.25292	1.51452	9.83041	9.98336	-2.74363	NA	NA	NA	NA	8.70755	-1.51452	9.8684	8.70755	9.78559	10.2315	NA	NA	NA	NA	-1.51452	NA	-1.51452	NA	NA	NA	9.93606
MS4A6E	ENSG00000166926.8	1.24563935004667e-18	8	3	3	5	NA	-1.03711	5.76428	NA	6.42482	-2.52776	NA	NA	-2.52776	NA	NA	NA	NA	NA	NA	NA	NA	NA	NA	NA	NA	NA	NA	-2.34111	NA	NA	NA	NA	NA	NA	NA	NA	NA	NA	NA	-9.18195	6.51766	NA	NA	NA	NA	NA	NA
MS4A4A	ENSG00000110079.16	1.27075234778884e-18	35	4	31	4	+	4.11013	3.53573	5.00532	7.18339	NA	5.00216	6.96596	4.78773	6.96596	NA	NA	6.95032	-2.84099	1.13368	NA	NA	4.78773	1.13368	NA	6.96596	NA	NA	1.13368	NA	NA	6.96596	6.96596	8.76473	NA	4.27935	5.55363	1.13368	6.96596	NA	6.96596	1.13368	1.13368	1.13368	-2.84099	6.93309	1.65538	NA
CR2	ENSG00000117322.17	4.00912740925577e-18	22	6	8	14	NA	-0.327078	1.83683	NA	NA	1.11977	NA	NA	0.878755	NA	NA	NA	NA	NA	NA	NA	NA	5.66285	-1.12788	NA	NA	-2.33913	1.23706	-1.50356	NA	-1.49954	NA	-1.49954	NA	-1.48152	NA	NA	NA	-1.66854	NA	-1.49954	-1.37213	1.16134	-0.878755	NA	NA	NA	-1.49954
HLA-DRA	ENSG00000204287.13	8.78873792088106e-18	31	6	18	13	NA	1.78003	3.04814	NA	-0.945898	NA	NA	0.407627	NA	-1.1873	NA	4.62057	5.55276	2.33615	NA	1.45047	NA	NA	2.33615	6.24757	5.82293	-1.12877	NA	NA	NA	-1.45526	5.45623	NA	-1.68694	NA	-1.17624	-1.12877	5.45623	NA	5.54457	5.4645	2.33615	5.45906	-1.12877	-2.33615	1.12877	-1.12877	-1.12877
CLU	ENSG00000120885.21	1.1947615284517e-17	23	6	16	7	+	2.78336	5.84443	5.97801	3.62885	8.42662	NA	-2.01253	-1.99415	-1.99415	NA	NA	NA	NA	NA	NA	NA	NA	-3.62885	-9.19202	-8.12073	NA	NA	6.90843	2.30206	NA	9.11982	NA	1.78072	NA	NA	3.49892	9.30525	NA	-4.68852	9.02669	NA	9.19202	3.87218	NA	NA	NA	NA
PPP1R37	ENSG00000104866.10	7.5432906803874e-17	40	5	10	30	-	-3.00018	4.00647	-5.04833	-2.7182	NA	4.84797	NA	NA	-6.3744	NA	NA	-5.11151	-1.09007	-4.47677	-6.64142	-6.3744	-5.13965	-6.91848	-6.21457	-5.13627	-2.73628	-6.3744	-4.47894	-2.73628	1.99974	-5.13965	-5.12417	-6.3744	-2.73628	-7.978	1.3302	NA	-4.19012	-5.79369	0.0994096	NA	NA	-5.01178	-6.3744	NA	-6.70471	-2.73628
CBLC	ENSG00000142273.10	2.34216949571498e-15	4	4	4	0	+	6.31576	1.69065	6.31576	NA	NA	NA	NA	NA	NA	NA	NA	NA	NA	NA	NA	NA	NA	NA	NA	NA	NA	NA	NA	NA	NA	NA	NA	NA	NA	NA	NA	NA	NA	NA	NA	6.35565	NA	NA	NA	4.09219	NA	6.61869
RP11-385F7.1	ENSG00000270761.1	3.03893541650169e-14	47	2	0	47	-	-5.63988	1.34301	-5.63988	-6.46392	-3.19216	-6.46753	-6.46753	-6.46753	-6.46753	-6.46753	-6.46753	-3.82828	-6.46753	-6.16391	-6.60673	-6.46753	NA	-6.11869	-6.46753	-3.69998	-6.46753	-6.46753	-6.58794	-4.19477	-6.46753	-6.62221	-6.57581	-3.21997	-6.46753	-6.46753	-3.00217	-6.46753	-6.46753	-4.7685	-4.99215	-6.46753	-0.65558	-4.54895	-6.46753	-4.68156	-5.08307	-6.46753
PICALM	ENSG00000073921.17	3.88235967609873e-14	43	5	42	1	+	5.15347	1.95182	5.33995	7.28014	6.20624	7.28014	4.38719	7.28014	4.96045	7.28014	NA	NA	7.28014	3.3296	NA	7.28014	3.78441	-2.67856	4.62745	7.28014	3.3296	7.28014	3.90338	5.12364	7.28014	4.51034	3.90338	4.8313	4.36823	6.26172	3.78441	6.60582	NA	7.0504	7.28014	3.67777	4.38083	4.51034	5.73417	NA	3.78441	6.68945
BTNL2	ENSG00000204290.10	6.79360945814906e-14	21	10	18	3	+	2.05783	3.04196	2.88143	NA	NA	NA	NA	NA	NA	NA	NA	5.98168	NA	6.06155	6.48566	2.21398	4.63676	-0.972639	5.16931	6.24652	0.996771	NA	NA	NA	1.87875	1.82093	1.36946	NA	NA	NA	NA	NA	NA	NA	2.27471	NA	NA	0.418136	1.78945	NA	-1.2701	1.57489
KLC3	ENSG00000104892.16	7.46125884175698e-14	23	3	2	21	-	-5.67553	4.63456	-7.00096	NA	-7.98968	NA	NA	NA	NA	-7.9437	-5.45197	-7.9437	NA	NA	-7.9437	-7.9437	-7.9437	-7.98968	-5.43035	-7.9437	NA	-5.66653	-7.98968	-7.7858	NA	NA	NA	NA	-7.48034	NA	NA	NA	NA	NA	-6.86293	NA	NA	NA	NA	NA	-8.49316	-8.08059
HLA-DQA2	ENSG00000237541.3	2.37429994351176e-13	45	5	1	44	-	-5.41226	1.90902	-5.54343	-6.52255	-6.03748	-5.44159	-7.21612	-7.35312	-7.35312	-5.57962	NA	-4.47416	-3.96874	-4.81257	-4.24835	-3.34752	-2.19845	NA	-7.35312	-2.62967	-4.14216	-5.66176	-7.35312	NA	-3.11743	-5.02742	-7.35312	-7.35312	-7.5873	-7.35312	-7.35312	-7.35312	-4.8703	0.359127	-7.35312	-4.00672	-7.35312	-4.52913	-4.27202	-3.96874	-7.35312	-7.35312
CD2AP	ENSG00000198087.7	2.8593291651185e-13	35	4	33	2	+	4.44616	2.43566	4.8657	3.17018	3.17018	4.56479	6.46753	3.17018	NA	NA	6.46753	NA	-0.387734	3.03569	4.56479	NA	4.56479	NA	0.718627	0.718627	5.60903	NA	NA	7.12025	6.46753	NA	NA	NA	6.26152	-4.56479	6.46753	3.17018	NA	7.37161	5.97338	4.56479	4.07069	4.56479	NA	6.44917	6.46682	6.46753
CASS4	ENSG00000087589.16	4.23645394831369e-13	41	3	22	19	NA	0.28823	6.18716	NA	7.39774	7.39774	2.0271	-7.39774	-2.0271	7.39774	-6.37922	-7.22795	-5.43532	0.601641	2.0271	-6.37018	-7.39774	-6.37922	-6.37922	-4.54127	-7.39774	-7.39774	-7.39774	NA	-7.74672	-7.39774	7.39774	-2.0271	7.39774	6.37922	6.37922	7.39774	2.0271	NA	-2.0271	NA	NA	5.06375	-2.0271	7.39747	7.39774	7.39774	NA
GEMIN7	ENSG00000142252.10	6.57370610806718e-13	48	2	47	1	+	5.56128	1.99445	5.7325	6.3744	5.97316	6.3744	6.3744	6.3744	6.3744	6.3744	6.00762	6.3744	0.690521	6.3744	6.3744	6.3744	6.3744	5.98705	6.3744	6.16653	6.3744	6.3744	6.3744	7.05707	-2.48617	6.3744	6.3744	5.98862	6.3744	6.3744	3.87677	5.82181	0.690521	6.00798	6.3744	5.97707	6.0789	5.95483	0.690521	5.87466	6.3744	6.3744
SLC24A4	ENSG00000140090.17	1.06621922161061e-12	42	8	25	17	NA	-0.500448	2.92871	NA	-7.14045	-5.84479	-3.92192	1.12302	1.45669	-0.0194766	1.57885	1.45669	1.45669	-0.586941	-0.462665	1.45669	NA	NA	1.45669	1.34922	1.5458	1.51385	-0.462665	-7.90423	NA	-1.45669	0.76823	1.45669	-0.322339	1.23004	-0.322339	1.45669	-4.9793	0.69986	1.45669	-1.29213	1.45669	1.37159	-0.804845	1.60104	NA	0.472102	NA
IGSF23	ENSG00000216588.8	1.55897489250399e-12	6	3	2	4	-	-1.77505	3.50343	-3.7235	NA	NA	NA	NA	NA	NA	NA	NA	NA	NA	NA	NA	NA	NA	NA	NA	NA	NA	-2.59172	NA	NA	NA	NA	NA	NA	NA	NA	NA	-2.59172	NA	2.59172	NA	NA	NA	NA	NA	-7.11885	NA	NA
NYAP1	ENSG00000166924.8	4.8087117049066e-12	42	4	5	37	-	-1.10214	2.56808	-1.44534	-6.43585	-6.69471	-0.503899	-0.393283	-5.67463	-0.284045	-0.0420824	-0.603644	-0.384137	NA	-0.603644	0.63565	-0.603644	0.0760249	-0.323123	-0.380899	-0.0420824	NA	-0.0420824	-6.23072	-0.453558	-0.0557993	-0.0557993	-7.07732	-0.603644	-6.51712	NA	-0.603644	-0.271779	NA	-0.0760249	-0.310469	0.0760249	-5.16888	-0.222741	-0.0557993	6.32393	-0.603644	0.0760249
CNN2	ENSG00000064666.14	1.23828522185771e-11	46	6	21	25	NA	0.189654	2.05909	NA	2.65748	0.164629	NA	1.58704	-1.74801	-0.045544	0.735984	-1.36684	2.80284	0.0433763	-0.772106	1.61266	-0.136235	-1.74801	1.30475	0.939392	1.88511	0.20985	-1.74801	-1.74801	-0.336324	3.50206	-0.471542	-1.65289	-1.48028	-1.94178	-2.48695	-0.279677	-1.74801	-1.04622	NA	1.43097	NA	-0.607811	0.545549	-1.97932	4.11641	-1.74801	-1.36684
MINDY2	ENSG00000128923.10	1.22242870505634e-10	49	4	11	38	-	-2.39266	3.10574	-3.87888	2.32688	-1.5262	-4.47136	4.23739	0.478673	3.69875	-4.47136	-4.47136	-4.47136	4.47136	4.47136	-4.47136	-4.02868	1.31264	-0.998369	-0.769051	-1.50145	1.30302	-4.47136	-4.47136	-3.89201	-4.47136	-4.47136	-4.47136	1.40702	-4.47136	-4.9286	-1.8833	-2.88534	-5.11924	-5.75912	-4.19661	-3.99908	-3.45347	4.37252	-0.330464	-4.47136	-4.47136	-5.77676
IRF2BP1	ENSG00000170604.4	1.47436029822358e-10	42	4	38	4	+	0.561032	1.33375	0.87753	NA	-0.355246	0.886271	0.756268	1.3381	1.31908	1.3381	1.3381	0.638029	0.738471	0.738471	NA	NA	0.638029	1.3381	0.253777	0.638029	0.638029	NA	1.3381	0.638029	0.638029	0.738471	0.513593	0.738471	0.513593	0.638029	-0.246015	NA	-6.87184	0.513593	0.738471	1.3381	1.19863	0.738471	0.672456	0.638029	NA	0.638029
APH1B	ENSG00000138613.13	1.87401651290524e-10	46	2	42	4	+	5.0239	2.7661	5.76067	6.4511	6.43691	-1.43477	6.43691	6.43691	6.45224	1.15617	-1.92366	6.43691	6.43691	6.43691	4.64575	6.43691	6.43691	NA	NA	6.43691	6.43691	6.43691	6.05529	4.89523	3.07277	6.43691	3.79029	6.43691	6.00842	6.43691	6.43691	6.43691	-1.43477	6.43691	6.05529	6.43691	5.91318	6.43691	6.43691	2.68232	6.43691	6.20197
HLA-DRB5	ENSG00000198502.5	3.35478619740282e-10	21	4	19	2	+	2.76272	1.79433	3.1651	4.22663	3.8489	4.31876	3.8489	1.75424	NA	NA	NA	NA	NA	NA	2.78783	NA	NA	NA	NA	3.8489	NA	1.69398	NA	NA	4.58232	0.186856	NA	NA	3.37014	NA	1.75424	NA	NA	4.57395	NA	4.69438	NA	3.13865	NA	1.75424	1.69398	NA
BCL3	ENSG00000069399.14	3.89511766500425e-10	6	3	0	6	-	-5.45512	2.51526	-5.45512	NA	NA	-0.497169	NA	NA	NA	NA	NA	NA	NA	NA	NA	NA	NA	NA	NA	NA	NA	NA	NA	NA	NA	NA	NA	NA	NA	NA	NA	NA	NA	NA	NA	NA	-6.81032	-6.81032	NA	NA	NA	NA
RP11-138I18.2	ENSG00000271046.1	6.48700114690936e-10	9	7	4	5	NA	0.676441	2.60231	NA	NA	NA	NA	NA	NA	NA	NA	NA	NA	NA	NA	NA	1.72102	NA	NA	NA	NA	6.60357	1.9588	NA	NA	-0.256708	NA	-2.08355	NA	NA	NA	NA	NA	NA	NA	NA	-1.42944	NA	NA	NA	NA	NA	NA
ARHGAP45	ENSG00000180448.10	7.42013098265638e-10	45	5	37	8	+	0.687518	1.59276	1.30964	1.91263	1.51333	1.16258	0.131194	1.16258	-1.07603	1.16258	1.91263	1.22753	1.84718	0.337953	0.417951	-1.14384	1.96917	1.91263	-0.0622603	-1.95394	1.58598	1.91263	0.357743	-4.81095	1.16258	1.16258	1.16258	1.2018	2.05441	1.89474	NA	NA	1.16258	1.16258	1.17278	-0.995352	-3.8096	1.66032	NA	1.95596	0.775679	0.670642
RP11-333E1.2	ENSG00000263164.1	1.07996812570061e-09	44	4	23	21	NA	0.319492	2.52802	NA	1.27008	NA	2.77868	-2.70142	5.71323	-1.36911	5.71323	-2.29959	1.77495	-2.29959	0.946628	1.15527	1.22907	-2.29959	-2.29959	NA	NA	NA	2.97849	0.873549	-3.44574	-0.139041	0.880889	1.05526	5.71323	-1.07225	1.48483	-0.669507	-3.33868	-0.213717	-2.33488	-2.81703	1.02195	-3.27582	NA	-2.29959	-2.91716	-0.802111	5.71323
ERCC2	ENSG00000104884.14	1.11180861038403e-09	32	4	32	0	+	5.65282	1.18205	5.65282	6.1441	6.6393	6.21304	6.06565	6.6393	5.64674	NA	5.20382	NA	NA	NA	NA	5.20382	NA	5.13599	0.60601	NA	5.13599	5.20382	NA	4.20657	6.6393	NA	5.13599	6.30006	6.37046	6.60504	6.00518	NA	NA	6.29819	5.13599	NA	5.58693	6.30006	5.9408	6.6393	5.20382	NA
FAM180B	ENSG00000196666.4	1.83522146815114e-09	45	4	2	43	-	-2.52062	1.90313	-2.75151	-3.10169	-0.716452	-0.716452	-3.10169	-4.48673	-3.10169	-0.716452	-2.83572	-4.79468	-5.04449	-4.65428	-4.65428	-4.7956	-0.716452	-3.80274	-4.79468	-4.72958	-2.83572	-2.83572	-1.46439	-3.20777	NA	-3.16871	-1.17311	-1.68849	-3.19275	-3.10169	-3.54402	-0.716452	-0.716452	NA	NA	2.33318	-0.716452	-4.66814	-3.14381	-3.18689	-0.716452	-2.43089
NUP160	ENSG00000030066.13	2.15603648212309e-09	19	4	0	19	-	-3.62693	1.44697	-3.62693	NA	NA	NA	NA	NA	NA	NA	NA	NA	NA	NA	NA	NA	-1.8178	NA	NA	NA	NA	NA	-4.76375	-3.05394	-4.76375	-4.76568	NA	-4.76568	-4.75896	NA	-4.76375	-4.75896	NA	NA	-1.8178	NA	-4.43482	-1.8178	NA	-3.05394	-4.75896	-1.8178
SLC39A13	ENSG00000165915.13	4.05699063697143e-09	47	3	5	42	-	-3.90117	2.95876	-4.81427	-5.6763	-4.99573	-4.99573	-4.99573	-4.99573	-4.99573	NA	-4.99573	-6.01303	-4.22082	-4.22082	-4.99573	-4.99573	-4.99573	-5.37767	-4.99573	-4.99573	-4.99573	-4.99573	-5.78278	5.08332	4.99573	-4.99573	-4.99573	-4.99573	-5.88043	-4.99573	1.36872	5.88043	-2.8464	-4.99573	-4.99573	-4.99573	-1.90255	-4.99573	-4.99573	NA	-4.99573	-4.99573
TAS2R60	ENSG00000185899.1	4.45664501413976e-09	2	2	0	2	-	-3.23985	4.02335	-3.23985	NA	NA	NA	NA	NA	NA	NA	NA	NA	NA	NA	NA	NA	NA	NA	NA	NA	NA	NA	NA	NA	NA	NA	NA	NA	NA	NA	NA	NA	NA	NA	NA	NA	NA	NA	NA	NA	NA	NA
ZNF652	ENSG00000198740.8	4.75647427859582e-09	31	5	9	22	-	-1.97899	2.46232	-3.24037	-1.19167	-3.4263	-2.15984	-3.03681	-5.40872	-5.82629	2.15984	NA	NA	NA	-2.02883	NA	NA	2.15984	NA	NA	NA	NA	NA	-5.82629	-3.03994	-2.02883	2.79448	0.243902	NA	-2.15984	NA	-3.36705	-4.0433	NA	0.243902	-2.15984	-5.82629	-3.92927	-0.56443	-2.02883	-2.02883	NA	NA
TREML1	ENSG00000161911.11	5.9234151151575e-09	14	4	6	8	NA	-0.554291	2.24013	NA	NA	-0.619584	-3.08625	NA	NA	NA	NA	-0.619584	NA	0.619584	NA	NA	NA	NA	NA	NA	NA	NA	-0.619584	NA	NA	NA	NA	-3.08625	NA	NA	NA	-0.619584	NA	NA	NA	NA	NA	NA	-3.15037	-3.80994	NA	0.619584	NA
CSTF1	ENSG00000101138.11	6.02257667986028e-09	46	8	43	3	+	3.0488	2.36	3.275	5.64164	6.04852	2.67734	4.93639	6.35798	4.08993	NA	0.688492	5.0091	0.688492	0.688492	5.65348	5.65348	0.684843	0.447644	5.05976	5.06004	0.180043	0.678404	5.53861	5.03949	0.456651	2.27103	0.596813	2.69347	2.12323	4.90534	2.75424	6.26059	NA	0.688492	4.94804	5.37214	3.89707	5.54341	6.27119	NA	0.323538	2.66875
RP11-30K9.6	ENSG00000245975.2	7.07578339750334e-09	48	2	0	48	-	-4.82642	0.654368	-4.82642	-4.24017	-4.47136	-4.47136	-4.47136	-4.47136	-4.16478	-4.47136	-4.47136	-5.90838	-4.47136	-5.8871	-5.78478	-4.47136	-5.63462	-5.61971	-5.79818	-4.47136	-4.47136	-4.47136	-4.47136	-4.38524	-5.01038	-4.47136	-5.78512	-4.47136	-5.02559	-4.47136	-4.41458	-5.54832	-4.47136	-4.47136	-4.33414	-7.06592	-4.42565	-4.46601	-4.47136	-4.47136	-4.47136	-4.47136
SCIMP	ENSG00000161929.14	8.22573627113405e-09	49	5	48	1	+	3.30509	1.8314	3.37759	4.23047	5.22396	4.93859	3.37746	5.83663	3.09491	5.06251	0.00872969	5.86357	1.95991	2.37798	3.45784	1.68418	5.83663	5.83663	2.19957	0.00872969	1.23295	5.70248	0.00872969	1.85854	3.44108	5.47384	5.83663	0.00872969	1.03709	2.81119	4.95716	5.82999	2.29391	-0.175091	2.77277	5.43666	1.95991	3.44459	3.76277	2.77373	3.78525	2.14472
TREM2	ENSG00000095970.16	9.20805052594748e-09	48	3	1	47	-	-2.19369	1.01314	-2.26392	-1.93685	-1.93685	-3.42487	-1.93685	-3.06878	-3.49445	-1.93685	-1.93685	-1.93685	-1.93685	-1.93685	-1.93685	-1.93685	-1.93685	-1.93685	-1.93685	-1.93685	-1.93685	-1.93685	-1.93685	-1.93685	NA	-1.93685	-1.93685	-1.86285	-3.22003	-1.93685	-1.93685	-3.57622	1.10714	-1.93685	-3.01921	-1.93685	-4.18073	-4.55002	-1.93685	-5.90076	-1.93685	-1.93685
GRIN3B	ENSG00000116032.5	1.02539133077791e-08	44	7	15	29	NA	-0.620071	1.99083	NA	-0.486652	-0.0709012	4.96021	-1.2126	0.156809	0.298293	0.757432	-1.1449	NA	-1.40881	-3.02968	0.957279	-0.626328	NA	NA	-3.78293	-3.70478	-1.72552	2.51371	-2.12178	5.02538	-1.89823	-0.0709012	-0.108151	0.14877	0.0655798	-1.84552	1.01273	1.78191	NA	-2.99263	-3.5785	0.00328939	-0.0622532	0.949654	-3.78293	-0.0709012	-2.30514	-0.896291
PSMC3	ENSG00000165916.8	1.09965390222164e-08	48	3	8	40	-	-1.61617	1.81278	-2.1926	1.18856	-1.77674	-2.66026	-2.45294	-2.72783	-2.37382	-1.53667	-1.8566	1.31609	-0.629049	-2.01681	-1.76692	-1.92223	1.18856	1.18856	-1.16117	-0.90566	-4.92684	-1.78077	-2.31255	-2.22117	-2.78373	-0.788531	-3.26422	-4.92684	-1.37053	-2.2692	2.02676	-0.399147	NA	-4.58573	-2.02099	-2.531	1.98628	-0.0948923	-0.718229	-4.92684	-2.21306	-0.858517
B4GALT3	ENSG00000158850.14	1.14045325589965e-08	45	4	24	21	NA	-1.89136	2.79501	NA	-6.1087	-5.32432	0.144268	0.144268	0.144268	-4.77323	4.83729	0.144268	0.144268	-4.13116	-4.50139	0.144268	NA	0.144268	2.57554	0.144268	0.144268	NA	0.144268	-5.81811	-5.88734	0.144268	-4.5927	NA	-4.68226	-3.87765	-5.01782	-4.77323	0.144268	-4.86637	0.144268	-5.45275	0.144268	-2.31191	-6.69677	0.144268	0.144268	0.144268	0.144268
RAPSN	ENSG00000165917.9	1.19199488136741e-08	46	4	31	15	+	1.02004	2.17219	2.11514	4.83191	4.89211	-4.83191	1.01903	NA	1.01903	4.89211	1.01903	4.14168	1.01903	1.05419	1.82772	1.05419	4.82571	1.05419	1.50705	4.72748	NA	1.01903	-1.51626	-1.01903	1.01903	1.01903	-0.285366	-1.51626	0.62078	-1.47991	1.19154	1.19154	NA	-1.05419	-1.37363	1.05419	-0.725232	-1.24324	1.05419	-1.05419	1.05419	4.83191
STAG3	ENSG00000066923.17	1.22535688669284e-08	48	6	14	34	-	-2.07962	3.54367	-3.95234	-0.867326	-1.43705	-5.30539	1.68414	-5.30539	1.64369	-5.30539	-5.30539	-5.35008	0.618286	-5.07644	-3.76712	-5.30539	-5.30539	-6.18391	-5.45792	-3.77422	-4.46179	-5.30539	-1.11785	5.84554	5.30539	-5.30539	-0.435582	-2.17426	0.535752	-2.30984	-5.30539	-5.30539	NA	5.30539	1.68414	0.427463	-5.30539	4.89126	-4.77354	-5.13521	-3.18008	-1.28889
AGFG2	ENSG00000106351.12	1.29263673315195e-08	47	3	44	3	+	1.45759	1.35583	1.67394	1.49653	1.49653	1.49653	1.49653	1.49653	1.49653	1.49653	1.49653	1.49653	5.90792	5.89678	1.49653	1.49653	1.49653	1.49653	1.49653	0.490656	1.49653	1.49653	NA	1.49653	-4.75383	1.49653	1.49653	1.49653	1.49653	1.49653	1.49653	1.49653	1.49653	1.49653	-0.196242	1.49653	1.49653	1.49653	1.49653	NA	1.49653	1.49653
CELF1	ENSG00000149187.17	1.30423039694231e-08	46	4	38	8	+	1.78833	2.43821	2.77757	1.17254	0.31297	3.0847	-4.58751	3.10799	-4.48981	3.1522	3.23285	3.17266	0.31297	3.10799	3.16246	-0.709622	3.10775	3.10766	3.10799	3.00098	3.10741	3.13713	3.11818	0.155711	3.11603	3.10799	3.12908	NA	3.11629	NA	3.10799	3.10799	-0.31297	0.31297	-4.63842	3.10799	3.10799	-3.71086	3.4427	3.12271	3.10945	3.13811
HLA-DQA1	ENSG00000196735.11	1.54484093681673e-08	44	6	36	8	+	1.83549	2.47526	2.72243	6.76085	1.45668	-0.636392	3.88601	0.543915	1.07386	4.30217	4.3611	4.3611	-0.119743	1.24724	1.52721	0.532261	-7.61389	0.92135	1.21411	2.46423	1.48221	NA	0.714336	-0.800475	3.16087	-2.11113	3.66912	3.08951	2.96817	2.34695	3.13865	4.3611	NA	-3.43551	2.95354	NA	2.47803	1.89181	1.93735	3.23071	3.56763	3.79967
ADAMTS4	ENSG00000158859.9	1.56153131818421e-08	11	4	6	5	NA	-1.1971	1.9276	NA	NA	0.381868	NA	NA	NA	NA	NA	NA	NA	-2.28636	NA	NA	NA	NA	NA	NA	NA	NA	NA	0.271473	-5.49657	-2.55169	NA	NA	NA	NA	NA	NA	NA	NA	0.271473	NA	NA	NA	0.271473	NA	NA	NA	-2.28636
FCER1G	ENSG00000158869.10	1.65190563475859e-08	46	5	0	46	-	-4.81308	1.46578	-4.81308	-6.30302	-5.13334	-4.9969	-2.49458	-2.39077	-5.11873	NA	-0.616096	NA	-2.58494	-2.41331	-4.88531	-4.71765	-2.41331	-5.4414	-5.12711	-5.4414	-5.1351	-0.616096	-5.47706	-3.00588	-5.45855	-5.49814	-4.99633	-5.11872	-4.53278	-5.42751	-5.4414	-5.52437	NA	-4.51021	-6.42291	-5.4414	-6.1472	-5.57067	-5.4414	-5.21827	-2.57187	-6.61396
SCARA3	ENSG00000168077.13	1.74679567680943e-08	40	9	18	22	NA	-0.502549	2.64853	NA	1.97804	-1.78877	-1.24006	-2.68742	-1.99415	-0.0406881	NA	1.4225	0.411344	2.70394	-5.07645	NA	-0.312038	2.79177	NA	0.652597	2.91741	-5.48005	-3.60836	-3.35725	-2.87348	1.4225	2.70394	NA	NA	-1.80806	0.422447	-2.44983	-1.53329	-0.805964	4.61216	2.12708	NA	-2.45432	-2.70394	-1.70413	NA	-4.55305	0.164681
GPC2	ENSG00000213420.7	2.19293284236898e-08	44	7	28	16	NA	0.633636	3.99305	NA	5.4241	-0.948763	-0.651381	5.80348	NA	0.57741	4.11776	1.19174	5.11879	5.54481	5.30539	1.19174	0.643232	-1.25363	2.41979	3.40091	3.45869	0.381366	0.654	-5.30539	5.22171	5.4241	-5.77661	-4.11776	1.19174	4.79706	-5.98285	-5.02456	-4.11776	-3.40091	-5.30539	NA	-0.742132	2.35904	1.32534	-5.4241	NA	0.40811	5.11879
EPHX2	ENSG00000120915.13	2.93415580333868e-08	48	3	46	2	+	1.79524	1.19741	1.90055	0.105195	0.784109	0.938266	3.38799	3.38799	2.92176	0.162336	2.39665	1.54957	1.74505	1.21119	0.980778	0.813718	0.34536	1.97757	1.42436	0.313916	2.39665	2.93611	3.38799	2.0207	2.80979	2.93461	0.781894	2.55041	3.22949	NA	2.77357	2.40855	2.49127	-0.966327	1.27919	3.80515	2.55662	3.38799	1.30717	1.12875	3.23298	2.39665
CD33	ENSG00000105383.14	4.4884287342498e-08	42	6	40	2	+	3.73939	2.03966	3.95235	4.00736	3.3425	3.84419	5.01521	5.01524	-0.235683	5.01169	0.682002	1.55885	5.01537	5.01668	0.682002	5.01253	6.82683	5.01337	0.682002	5.0119	5.01521	5.01521	5.01521	NA	5.01178	0.577716	5.01169	1.93696	0.577716	-0.804177	NA	0.682002	NA	5.01569	4.37797	6.80523	1.93696	NA	5.01499	NA	5.01225	0.682002
C6orf10	ENSG00000204296.11	6.19744246499894e-08	1	1	0	1	-	-5.41301	NA	-5.41301	NA	NA	NA	NA	NA	NA	NA	NA	NA	NA	NA	NA	NA	NA	NA	NA	NA	NA	NA	NA	NA	NA	NA	NA	NA	NA	NA	NA	NA	NA	NA	NA	NA	NA	NA	NA	NA	NA	NA
NR1I3	ENSG00000143257.11	6.20988408183202e-08	43	4	21	22	NA	-0.144351	1.97153	NA	NA	1.72231	-1.72231	1.48873	-1.07788	-1.72231	-1.72231	-1.72231	-1.72231	-0.3863	1.72231	-1.72231	-3.21695	-1.72231	-0.393897	-1.72231	-1.83466	NA	1.72231	1.72231	-5.78719	1.72231	NA	1.72231	NA	1.72231	1.72231	-3.22558	1.72231	1.72231	-1.72231	1.72231	1.72231	-2.65001	1.72231	-1.72231	-1.72231	-1.72231	1.72231
FERMT2	ENSG00000073712.14	6.85683629448681e-08	35	5	25	10	+	0.581181	2.10476	1.5739	0.848242	NA	0.848242	3.61168	3.45958	3.49692	-0.511239	NA	-0.194438	NA	NA	-3.39824	-0.451868	0.848242	NA	-0.511239	0.848242	NA	NA	3.61168	0.848242	0.848242	3.50599	NA	3.66797	NA	3.61168	0.848242	NA	0.848242	NA	NA	0.848242	-4.9861	NA	0.298994	0.848242	0.848242	0.848242
IRGQ	ENSG00000167378.8	6.92330284744969e-08	49	5	42	7	+	1.28515	2.27098	2.05209	2.22409	0.417388	1.84825	1.8439	-1.25501	1.8439	-5.44014	1.8134	1.93435	1.95442	1.8439	0.417388	-1.30479	1.77589	2.17518	0.27423	1.8702	-5.51935	2.49933	1.86463	1.8439	4.37879	1.83968	2.83328	2.48448	2.45136	2.42587	0.669642	5.15995	0.907728	1.22162	2.33561	1.85483	5.15995	2.54641	0.712245	-1.95442	-5.54348	2.85279
PITPNA	ENSG00000174238.14	7.91951335133758e-08	46	3	42	4	+	2.00107	1.52982	2.3789	1.10729	2.26882	3.12086	2.26882	2.26882	2.26882	2.26882	2.26882	NA	0.527121	-0.894186	1.00755	3.18862	2.26882	-2.20005	2.26882	2.26882	2.26882	2.26882	2.26882	-4.26015	NA	2.26882	3.21903	2.26882	1.75517	2.22239	0.985072	2.24656	NA	2.16443	3.28557	2.26882	2.26882	-0.5102	3.48203	2.26882	3.58372	2.26882
NDUFS3	ENSG00000213619.9	9.21947061408151e-08	43	3	30	13	+	-0.709375	2.50766	0.710936	-4.9796	0.31297	0.31297	0.31297	0.31297	0.31297	0.31297	NA	-4.83204	-4.39141	-3.29755	-1.65927	0.31297	0.31297	0.31297	-4.92219	-4.96852	0.31297	0.31297	-4.99983	4.83204	0.31297	0.31297	0.31297	-5.00195	4.48632	NA	0.31297	0.31297	0.31297	NA	0.31297	0.31297	0.31297	-4.83204	1.9765	1.89601	0.31297	-4.93453
FBXO46	ENSG00000177051.5	1.08218181716553e-07	33	5	4	29	-	-3.06001	3.04405	-4.10153	-4.70714	-4.70714	NA	-4.70714	-4.70714	-5.51921	-4.70714	-4.70714	-3.66295	4.491	NA	NA	NA	-4.70714	NA	NA	-4.70714	NA	NA	-0.946284	-4.70714	-4.70714	-3.21653	-2.29825	-3.50964	-4.5096	-3.21653	NA	NA	NA	NA	NA	4.491	NA	-3.21653	-4.70714	4.491	-4.70714	-3.72605
ADAM10	ENSG00000137845.14	1.09739603215002e-07	49	7	17	32	NA	-1.27547	3.86607	NA	-4.90636	-3.78886	-4.70337	-5.41098	-4.36868	-4.9235	1.92932	2.02982	4.67189	2.38315	1.18482	3.01269	1.92932	6.42139	6.11243	4.18151	4.9286	6.10614	4.73288	-5.49827	0.411493	-4.44068	-4.5152	-3.64693	-3.89118	-5.21248	-3.73405	-3.14699	1.92932	-2.42263	-3.72787	-4.08914	-3.52463	-5.62525	6.62929	-1.24523	-3.74046	-3.52463	1.92932
RTFDC1	ENSG00000022277.12	1.20311532261794e-07	29	2	24	5	+	1.64455	2.09146	2.47567	2.40465	2.16827	NA	2.16025	NA	2.13356	NA	NA	NA	2.40465	NA	2.40465	0.308735	NA	NA	NA	5.63234	NA	NA	2.40465	NA	NA	-2.32278	2.40465	-2.32278	2.40465	NA	2.39842	NA	NA	NA	2.16025	2.40465	-2.28175	2.13356	2.13356	-2.39842	5.63234	2.40465
GATS	ENSG00000239521.7	1.30320110327236e-07	42	7	19	23	NA	-0.488815	2.00223	NA	-1.65829	-0.0349243	0.618286	0.580566	-0.0349243	-0.681745	NA	0.618286	-4.1901	NA	-6.35314	-0.0381603	NA	-4.40269	-5.38617	0.618286	0.0349243	0.5044	-4.57409	0.618286	-1.65829	0.0349243	-0.0349243	NA	1.11076	0.405979	0.441981	4.30488	-0.0349243	NA	-0.0349243	NA	0.618286	-0.0349243	-3.35642	0.618286	-0.462797	-0.0349243	1.22339
TSC22D4	ENSG00000166925.8	1.36047290609764e-07	48	4	38	10	+	-0.0824976	1.2679	0.449763	-3.15273	-3.064	0.346477	0.396716	0.113304	0.1094	0.0969159	0.120538	-1.68694	0.161473	0.13236	0.146769	1.73558	1.73558	0.0951365	0.139684	0.0881029	0.0343926	-1.73558	0.0852081	0.121672	1.50048	1.79189	0.368029	1.45411	-2.64343	0.858521	0.0944771	0.0874689	0.0733206	0.0733206	-1.07651	0.0733206	-0.13141	0.082633	1.73558	0.833401	0.0881029	0.115697
NDUFS2	ENSG00000158864.12	1.64964003677734e-07	47	3	1	46	-	-4.54422	1.05597	-4.64891	-5.2758	-5.30588	NA	-5.66858	-4.04648	-4.68957	-6.28478	-4.04648	-4.68955	-4.04648	-6.13425	-4.62111	-3.02364	-6.12001	-5.01713	-4.64537	-5.54408	-5.2724	-4.04648	-5.72892	-4.29881	-4.12782	-4.04648	-4.4907	-4.99086	-5.12711	-5.31767	-4.4976	-4.0699	-5.38949	NA	-4.04648	-5.40555	0.271473	-5.03811	-4.04648	-4.0824	-4.27568	-5.35464
ZNF594	ENSG00000180626.9	1.69756836946061e-07	33	4	9	24	-	-0.0873667	1.22416	-0.674525	-2.18738	0.835206	NA	0.742767	NA	-0.468321	1.30073	NA	NA	-0.458685	-0.468321	0.341397	-0.468321	NA	-0.468321	-0.468321	-0.468321	3.29339	NA	-0.468321	2.19769	NA	-2.18738	-0.468321	3.05443	NA	-0.468321	-0.102299	0.892144	-0.468321	NA	-0.635692	NA	-0.468321	0.647753	-0.468321	-2.18738	-0.468321	-0.468321
GRN	ENSG00000030582.17	2.02871924416772e-07	45	4	12	33	-	-3.01742	3.08042	-4.68044	-4.43879	-2.88619	1.2427	-5.64699	-5.64699	-5.60185	1.76849	-5.64699	-5.64699	-5.64699	-5.64699	-5.3004	-5.28716	NA	-0.545934	-5.66424	-5.47608	-5.60412	-5.64699	1.76849	-5.64699	-1.76849	-4.29981	0.907594	-5.64699	2.63405	-4.70693	-5.82609	-5.17322	1.76849	1.40876	1.42558	1.76849	-1.76849	-5.64699	-5.64699	-2.61254	-5.64699	-5.64699
KBTBD4	ENSG00000123444.13	2.21481118324211e-07	39	2	25	14	NA	1.30794	4.49338	NA	4.59623	4.59623	4.59623	4.59623	4.59623	4.59623	NA	4.59623	-4.59623	-4.59623	-4.59623	4.59623	NA	4.59623	4.59623	-4.59623	-4.59623	NA	NA	4.59623	4.59623	-4.59623	4.59623	-4.88408	4.59623	-4.59623	NA	NA	4.59623	5.33535	4.59623	NA	4.59623	-4.59623	NA	-4.59623	4.59623	4.59623	NA
ERCC1	ENSG00000012061.15	2.34048287041131e-07	35	4	1	34	-	-3.30807	1.23947	-3.43163	-2.74558	-4.10375	-3.11603	-4.83352	NA	-5.20764	-5.2345	-3.5404	-2.62225	NA	-3.11603	-1.57125	NA	NA	NA	NA	-3.5404	-3.11603	NA	-1.97718	-4.26408	NA	NA	-3.11603	-2.58623	-5.42306	-3.14572	-2.59786	NA	NA	NA	-4.9395	-3.5404	-2.62225	-3.11603	-1.91665	-4.05873	-5.68501	NA
FAM209B	ENSG00000213714.1	2.46691333363138e-07	27	3	27	0	+	1.18798	1.95399	1.18798	5.62105	NA	NA	NA	NA	NA	NA	0.23922	0.23922	0.23922	0.23922	0.23922	0.23922	NA	NA	0.23922	0.23922	NA	0.23922	NA	NA	NA	0.23922	0.23922	NA	NA	NA	NA	NA	NA	NA	0.23922	NA	5.69727	NA	0.23922	NA	4.50013	0.23922
SPI1	ENSG00000066336.11	2.97964880269644e-07	45	3	39	6	+	2.86565	2.71375	3.73385	2.56495	2.56495	5.53617	2.56495	5.27595	-2.56495	5.65854	1.88522	2.56495	-5.49685	2.56495	4.73328	2.56495	5.02344	NA	4.85067	2.56495	2.56495	2.56495	2.56495	-1.25073	5.45147	5.67929	5.76331	-2.56495	NA	5.60232	5.56994	5.33749	2.56495	5.69314	2.56495	2.56495	-2.56495	NA	5.47478	-2.22322	2.56495	2.56495
PVRIG	ENSG00000213413.2	2.99026474093271e-07	37	4	6	31	-	-3.8672	2.9479	-5.05696	-5.02477	-5.02477	NA	NA	NA	3.29292	0.57741	-3.29292	-5.88429	-5.02477	-5.50518	-6.0187	-2.40287	-4.86739	NA	0.618286	-5.3204	-5.50055	-6.01172	-5.50055	-5.02477	-5.50055	-6.2141	-5.02477	NA	-5.02477	-5.02477	-3.29292	-5.28172	-3.29292	NA	-5.50055	5.3204	-5.3204	-5.78433	NA	-5.02477	NA	-5.02477
FAM209A	ENSG00000124103.8	4.2775282854991e-07	17	3	3	14	-	-1.44411	1.83418	-2.24929	-2.37453	NA	2.31336	NA	NA	-2.37453	NA	NA	NA	2.31336	NA	NA	NA	NA	NA	NA	NA	NA	NA	NA	NA	NA	-2.37453	NA	-2.37453	NA	-2.16827	NA	NA	NA	NA	-2.36561	NA	-2.37453	NA	NA	-2.37453	2.31336	NA
SRRM5	ENSG00000226763.4	4.33462910619197e-07	32	6	21	11	NA	-0.496243	2.65844	NA	1.09025	0.0208904	NA	NA	-0.0331446	0.0208904	NA	NA	0.0208904	-2.85279	NA	1.8439	2.9856	NA	-5.15995	0.527194	NA	0.0208904	-2.85279	NA	0.0208904	-5.15995	NA	-4.96259	NA	2.85279	0.651649	NA	2.01179	NA	NA	1.8439	NA	-5.15995	0.264846	-5.15995	-0.0331446	0.103164	-2.05595
ACE	ENSG00000159640.15	4.50544501010146e-07	46	2	11	35	-	-2.59795	4.30445	-4.97947	-5.08926	-4.93097	-4.93097	-5.08926	NA	-4.93097	-5.08926	-5.08926	-4.93097	-5.08926	-4.93097	-5.08926	-4.93097	-5.08926	-4.93097	-5.08926	5.45399	-4.93097	-4.93097	-5.38243	-5.08926	4.93097	5.08926	4.93097	-4.93097	-4.93097	-4.93097	-4.93097	-4.93097	4.93097	5.11267	4.99291	-4.93097	-4.83038	-5.08926	-5.08926	-5.08926	NA	-4.93097
MARK4	ENSG00000007047.14	4.64793293464394e-07	44	3	40	4	+	2.01448	1.71397	2.51595	2.48617	2.48617	2.48617	2.48617	2.48617	2.48617	2.48617	2.48617	2.48617	2.48617	2.48617	2.48617	2.48617	2.48617	2.48617	2.48617	2.48617	2.48617	2.48617	2.48617	2.48617	2.48617	2.48617	2.48617	2.48617	2.48617	NA	2.48617	NA	-1.79022	2.48617	2.48617	2.48617	4.97747	-4.68316	2.48617	2.48617	NA	2.48617
TOMM40L	ENSG00000158882.14	5.48448443342736e-07	37	4	14	23	NA	-0.996415	2.64168	NA	0.849431	1.31761	-4.20503	-3.06336	NA	-3.06336	-3.06336	NA	-3.06293	NA	3.06336	3.06336	NA	-3.06336	NA	NA	-4.08059	NA	NA	-3.06336	-3.06336	-3.06336	-0.60612	NA	NA	4.59296	-0.333009	-3.06336	-3.06336	-4.31994	-0.843854	2.06386	3.06336	-3.06336	0.852674	-3.06336	-3.06336	3.06336	-4.11314
RP11-521O16.1	ENSG00000260634.1	7.23246585493485e-07	30	3	6	24	-	-0.800549	1.4384	-1.29478	NA	NA	NA	-1.50588	3.33324	NA	-0.85198	0.9924	-0.85198	-0.800616	-0.892482	-1.11768	-1.42408	0.962282	-0.85198	-0.85198	-0.85198	-1.71419	-0.505204	NA	1.10338	NA	NA	-2.30646	-0.42926	NA	-0.85198	NA	NA	-3.20362	NA	-0.414208	NA	NA	-0.849416	-0.784548	NA	-2.40542	-0.457313
HLA-DRB1	ENSG00000196126.11	1.05196384391862e-06	30	7	28	2	+	3.10182	2.06734	3.35716	6.07704	NA	1.40559	1.25388	NA	NA	NA	NA	0.421437	NA	6.44954	4.90191	3.90946	NA	4.66335	6.22189	4.91068	4.66335	NA	3.30279	0.102953	NA	2.58075	0.857901	0.795318	2.02031	2.46273	3.47302	3.92349	NA	NA	2.63016	NA	6.44954	NA	3.73472	2.95246	NA	NA
GCNT7	ENSG00000124091.9	1.14049146117648e-06	38	4	16	22	NA	0.340449	1.58929	NA	-0.301898	-0.301898	-2.21973	-0.301898	0.301898	-0.301898	NA	NA	-0.301898	5.69727	0.301898	-0.301898	0.301898	NA	NA	0.301898	NA	0.301898	NA	NA	-0.301898	-0.581258	0.301898	NA	NA	2.2262	0.301898	2.22271	-0.301898	0.301898	-0.301898	NA	-0.301898	NA	-0.301898	0.301898	-2.07809	5.68203	-0.301898
DMWD	ENSG00000185800.11	1.17390595781296e-06	40	4	39	1	+	4.01862	1.55267	4.23472	4.4092	4.06457	4.45559	4.55985	4.02884	4.25896	NA	NA	4.4092	3.04994	3.54261	NA	NA	NA	NA	NA	4.4092	4.4092	4.4092	4.13366	4.4092	4.4092	4.35304	4.32859	4.5342	4.5342	4.08534	NA	4.05363	NA	4.4092	4.84267	4.4092	0.783639	3.81746	4.4092	4.98358	-4.4092	3.42971
ACP2	ENSG00000134575.9	1.26559615153473e-06	49	3	18	31	NA	-0.766462	1.31479	NA	-2.36965	-0.194385	-0.194385	0.875347	0.594601	-2.48637	-0.194385	-4.62392	-2.83689	0.329375	-2.00615	-0.194385	0.500793	0.494475	0.504342	0.467093	0.491063	0.459997	-3.04593	-0.194385	0.356478	-1.2591	-2.53577	0.46815	-1.75188	-2.10189	-1.68743	-0.194385	-0.882328	0.334136	0.27776	-0.924854	0.369991	-0.922517	-2.53085	0.418896	-0.194385	-0.194385	-0.901957
MTCH2	ENSG00000109919.9	1.38290102592812e-06	29	2	0	29	-	-4.66729	0.559463	-4.66729	-4.55194	NA	NA	NA	NA	NA	-4.84731	-4.78587	-4.78587	-4.84731	-4.84731	-4.78587	-4.78587	-4.84731	-4.84731	-4.65428	-4.78587	-1.98034	NA	NA	-4.84731	NA	-4.84731	NA	-4.86765	NA	-4.84731	-4.84731	-4.84731	NA	-4.84731	-4.27701	NA	-4.8657	-4.84731	-4.08063	NA	NA	NA
GAL3ST4	ENSG00000197093.10	1.73886860187661e-06	35	3	7	28	-	-0.417545	2.52959	-1.36666	-0.468055	-0.499797	-0.468055	-0.75503	-0.468055	-0.468055	NA	NA	NA	5.30539	3.12412	NA	NA	-3.64485	NA	NA	NA	NA	NA	-0.468055	2.02278	-0.468055	-5.26745	-0.468055	-4.28044	2.02917	-4.48042	-0.468055	-0.468055	NA	NA	-0.468055	-0.468055	-0.468055	-0.468055	NA	NA	4.59485	-0.468055
[truncated: 20 more columns]

## Sheet: Sheet 4
GBJ results using MiGA data
gene_name	ensg_id	GBJ_pvalue	n	n_pos_dir	n_neg_dir	consensus	GBJ_stat	GBJ_stat_directional	MFG_spredixcan_zscore	STG_spredixcan_zscore	SVZ_spredixcan_zscore	THA_spredixcan_zscore
OPA3	ENSG00000125741	1.66533453693773e-15	4	4	0	+	32.911	32.911	2.2584	8.2895	2.2584	0.953652
TOMM40	ENSG00000130204	1.66533453693773e-15	2	0	2	NA	32.911	NA	NA	-2.98686	-19.958	NA
ZNF222	ENSG00000159885	1.66533453693773e-15	2	1	1	NA	32.911	NA	NA	-17.7729	2.53924	NA
ZNF285	ENSG00000267508	1.66533453693773e-15	3	1	2	NA	32.911	NA	4.43348	NA	-16.2817	-4.82629
DTX4	ENSG00000110042	4.9960036108132e-15	4	2	2	NA	31.8123	NA	-5.26366	8.08337	6.14969	-6.02865
CASS4	ENSG00000087589	6.32827124036339e-15	4	0	4	-	31.6442	-31.6442	-7.01912	-7.01902	-7.01912	-7.01912
DYRK3	ENSG00000143479	1.66533453693773e-14	3	2	1	NA	30.6084	NA	7.92241	-1.43346	NA	0.330585
PICALM	ENSG00000073921	4.18554080283684e-14	4	0	4	-	29.6822	-29.6822	-7.54413	-6.83695	-2.37576	-4.09947
TAP2	ENSG00000204267	4.15223411209809e-13	4	1	3	NA	27.3918	NA	-6.46818	6.88518	-6.61332	-6.18094
USP6NL	ENSG00000148429	6.26387830493513e-13	4	4	0	+	26.9819	26.9819	6.57189	6.57189	6.57189	6.57189
RP11-138I18.2	ENSG00000271046	6.66577903984944e-13	4	4	0	+	26.9193	26.9193	6.56553	6.56553	6.56553	6.56553
ZNF226	ENSG00000167380	1.01785246897634e-12	4	0	4	-	26.496	-26.496	-6.45155	-0.181275	-7.40061	-0.452099
OR5A1	ENSG00000172320	1.68220992691204e-12	2	1	1	NA	25.9934	NA	-7.33341	NA	1.19744	NA
RTN2	ENSG00000125744	2.81030754223366e-12	4	4	0	+	25.4802	25.4802	6.416	6.416	6.41597	6.416
TRAPPC6A	ENSG00000007255	3.63731267327694e-12	4	0	4	-	69.3147	-69.3147	-11.5359	-11.5359	-11.5359	-11.5359
ZNF112	ENSG00000062370	3.63731267327694e-12	4	4	0	+	69.3147	69.3147	8.90403	8.90403	4.50217	8.90403
PVR	ENSG00000073008	3.63731267327694e-12	4	1	3	NA	57.3193	NA	-7.39421	-7.45577	-7.48279	7.45337
PPP1R37	ENSG00000104866	3.63731267327694e-12	4	0	4	-	69.3147	-69.3147	-11.9094	-14.5568	-2.76108	-11.7395
PTK2B	ENSG00000120899	3.63731267327694e-12	4	4	0	+	60.7201	60.7201	7.677	7.677	7.677	7.677
SNRPD2	ENSG00000125743	3.63731267327694e-12	4	0	4	-	69.3147	-69.3147	-8.8762	-14.3575	-3.9033	-8.8762
TCN1	ENSG00000134827	3.63731267327694e-12	4	4	0	+	69.3147	69.3147	8.49892	8.49892	8.49892	8.49892
BIN1	ENSG00000136717	3.63731267327694e-12	4	4	0	+	55.1716	55.1716	7.31285	7.31104	7.30619	7.35732
ZNF180	ENSG00000167384	3.63731267327694e-12	4	4	0	+	69.3147	69.3147	35.943	35.943	35.943	35.943
GPR4	ENSG00000177464	3.63731267327694e-12	4	0	4	-	68.5038	-68.5038	-8.17468	-8.18007	-8.18014	-8.18655
ZNF223	ENSG00000178386	3.63731267327694e-12	4	0	4	-	69.3147	-69.3147	-15.5958	-0.933155	-7.43199	-20.6691
ZNF284	ENSG00000186026	3.63731267327694e-12	4	1	3	NA	69.3147	NA	-16.4147	16.5457	-16.0117	-15.8076
CYP27C1	ENSG00000186684	3.63731267327694e-12	4	4	0	+	69.3147	69.3147	12.0959	12.0879	12.1044	10.2228
APOC1P1	ENSG00000214855	3.63731267327694e-12	4	4	0	+	69.3147	69.3147	11.0841	11.0841	11.0841	11.0841
ZNF224	ENSG00000267680	3.63731267327694e-12	4	4	0	+	66.3066	66.3066	8.02814	8.02814	22.8185	8.02814
NA	ENSG00000279407	3.63731267327694e-12	4	2	2	NA	69.3147	NA	13.8507	-11.3711	14.5885	-1.56445
GPSM3	ENSG00000213654	4.52327064692781e-12	4	1	3	NA	25.0038	NA	2.20519	-5.43843	-6.36509	-6.37822
SLC39A7	ENSG00000112473	4.93050045236032e-12	4	3	1	NA	24.9177	NA	6.25099	6.35581	-6.22549	6.96421
MS4A4A	ENSG00000110079	4.97712981939458e-12	4	4	0	+	24.9082	24.9082	6.35479	6.35479	6.35479	6.35479
ZKSCAN5	ENSG00000196652	8.67073080002001e-12	1	0	1	NA	24.3529	NA	NA	-7.11041	NA	NA
SLC24A4	ENSG00000140090	1.45400358420034e-11	4	0	4	-	23.8357	-23.8357	-6.23699	-6.23699	-6.23699	-6.23699
ERCC2	ENSG00000104884	3.1912361642128e-11	4	3	1	NA	23.0491	NA	6.10609	-6.1224	6.15217	6.1479
TSBP1-AS1	ENSG00000225914	4.60337323815452e-11	4	0	4	-	22.6825	-22.6825	-5.36809	-5.72358	-6.10553	-6.18891
SPDYE3	ENSG00000214300	5.00977037631856e-11	4	0	4	-	22.5979	-22.5979	-6.36577	-6.09566	-6.05827	-5.82652
CR1	ENSG00000203710	1.2091683210258e-10	4	0	4	-	21.7162	-21.7162	-5.99109	-5.99109	-5.99109	-5.99109
MAPK8IP1P2	ENSG00000263503	2.39048003614073e-10	4	0	4	-	21.0339	-21.0339	-5.89931	-5.90773	-5.91482	-5.88992
NR1H3	ENSG00000025434	3.27252225318375e-10	4	0	4	-	20.7199	-20.7199	-5.84803	-5.86859	-5.8196	-5.87984
HCP5	ENSG00000206337	1.53429868809951e-09	4	0	4	-	19.1737	-19.1737	-5.66829	-5.66829	-5.66829	-5.66829
CCDC6	ENSG00000108091	1.67092195635377e-09	4	0	4	-	19.0884	-19.0884	-5.62779	-5.62687	-5.67867	-5.65684
HLA-DRB5	ENSG00000198502	1.67252345306679e-09	4	4	0	+	19.0874	19.0874	5.65671	5.65671	5.65671	5.65671
HLA-DRB1	ENSG00000196126	1.72427883082804e-09	4	4	0	+	19.0569	19.0569	5.65261	5.65261	5.65261	5.65261
FERMT2	ENSG00000073712	2.33305541552653e-09	4	4	0	+	18.7544	18.7544	5.61163	5.61163	5.61163	5.61163
PTPMT1	ENSG00000110536	3.18043369418319e-09	4	4	0	+	18.4444	18.4444	5.56845	5.56909	5.56909	5.56909
PLAUR	ENSG00000011422	3.81349729572378e-09	4	2	2	NA	18.2628	NA	5.60745	5.54388	-2.5053	-4.6556
LSM2	ENSG00000204392	4.12029432794725e-09	4	4	0	+	18.1854	18.1854	5.53308	5.53308	5.53308	5.53308
FAM131B	ENSG00000159784	6.96356428075973e-09	4	1	3	NA	17.6605	NA	2.3998	-5.40104	-5.45884	-5.54181
ZKSCAN1	ENSG00000106261	9.75567371330754e-09	4	0	4	-	17.3233	-17.3233	-5.41023	-5.40964	-5.41023	-5.41023
EPHA1-AS1	ENSG00000229153	9.84092418665483e-09	4	0	4	-	17.3146	-17.3146	-5.40896	-5.40896	-5.40896	-5.40896
NA	ENSG00000280339	1.06301540903075e-08	4	2	2	NA	17.2376	NA	-0.412728	0.779197	-6.05086	0.0777151
HLA-DQA1	ENSG00000196735	1.34638024062994e-08	4	4	0	+	17.0011	17.0011	5.3631	5.3631	5.3631	5.3631
PPM1N	ENSG00000213889	1.4963708938609e-08	4	0	4	-	16.8955	-16.8955	-5.34752	-5.34752	-5.34752	-5.34752
APOC4	ENSG00000267467	1.88151786373325e-08	4	4	0	+	16.6666	16.6666	5.31348	5.2768	5.15278	5.51451
ZNF652	ENSG00000198740	1.88651813060048e-08	4	4	0	+	16.6639	16.6639	5.31308	5.31308	5.31308	5.31308
BCAM	ENSG00000187244	2.00167575847843e-08	4	2	2	NA	16.6047	NA	-5.30422	-5.30166	4.94525	5.30519
MED20	ENSG00000124641	2.14578694812673e-08	4	2	2	NA	16.5352	NA	5.93613	1.84849	-0.814129	-1.00446
ZBTB22	ENSG00000236104	3.01303977323641e-08	4	0	4	-	16.1958	-16.1958	-2.34579	-2.41869	-5.87991	-0.496486
ZYX	ENSG00000159840	3.17607778965723e-08	4	0	4	-	16.1431	-16.1431	-5.2344	-5.23441	-5.23441	-5.2344
FAM131B-AS2	ENSG00000232533	3.18662674025916e-08	4	0	4	-	16.1398	-16.1398	-5.2339	-5.2339	-5.2339	-5.2339
PPP1R35	ENSG00000160813	5.29886565736604e-08	4	1	3	NA	15.6316	NA	-5.15547	-5.74512	2.55648	-0.636154
STX3	ENSG00000166900	9.03820399633659e-08	4	3	1	NA	15.0979	NA	2.89114	5.69421	0.556293	-0.29877
AC135050.1	ENSG00000232748	9.65606400393781e-08	4	4	0	+	15.0319	15.0319	5.0618	5.06093	5.04836	5.04498
CD33	ENSG00000105383	9.84708292683933e-08	4	4	0	+	15.0123	15.0123	5.05782	5.05782	5.05782	5.05782
OR5A2	ENSG00000172324	1.2184808739768e-07	4	0	4	-	14.7995	-14.7995	-0.254036	-0.261838	-5.64267	-0.261838
NOVA2	ENSG00000104967	2.064723169104e-07	4	2	2	NA	14.2725	NA	-5.55054	0.213132	0.326281	-3.21358
DDAH2	ENSG00000213722	2.42210107304075e-07	4	2	2	NA	14.113	NA	0.0948237	4.9121	-4.86788	-4.98681
DAXX	ENSG00000204209	3.35543028806562e-07	4	2	2	NA	13.7874	NA	4.79126	4.82419	-4.85827	-4.98733
TIGD1	ENSG00000221944	3.39658336900861e-07	4	4	0	+	13.7752	13.7752	2.79186	4.77441	4.9022	4.85624
TMEM132A	ENSG00000006118	4.46151175115261e-07	4	1	3	NA	13.5027	NA	-5.41318	-2.57871	1.38008	-2.07504
NFKBIL1	ENSG00000204498	5.23385485728944e-07	4	2	2	NA	13.3432	NA	-4.31475	2.06079	-5.38428	2.09909
ZNF232-AS1	ENSG00000234327	5.9374290328762e-07	4	0	4	-	13.2172	-13.2172	-4.76123	-4.7231	-4.76267	-4.77372
EXOSC6	ENSG00000223496	6.86728124255076e-07	4	4	0	+	13.0718	13.0718	4.73803	4.73803	4.73807	4.73803
ACE	ENSG00000159640	8.50882585834434e-07	4	1	3	NA	12.8576	NA	-4.77409	-1.53588	-4.70153	3.18048
TMEM259	ENSG00000182087	9.46450281258393e-07	4	0	4	-	12.7513	-12.7513	-4.68325	-4.68331	-4.68314	-4.68331
PDPR	ENSG00000090857	1.10243625939255e-06	4	0	4	-	12.5988	-12.5988	-4.65709	-4.70177	-4.51536	-4.65407
LINC02210	ENSG00000204650	1.17321119574854e-06	4	0	4	-	12.5367	-12.5367	-4.64637	-4.64637	-4.64637	-4.64637
PSMC3	ENSG00000165916	1.18715091002031e-06	4	0	4	-	12.5249	-12.5249	-4.64573	-4.63586	-4.63824	-4.64433
ATF6-DT	ENSG00000226889	1.5807667795853e-06	1	0	1	NA	12.2387	NA	NA	NA	-5.17989	NA

## Sheet: Sheet 5
Drugs with negative CMap connectivity to the brain tissue GTEx signature
compound_name	compound_description	connectivity_score
mupirocin	Isoleucyl-tRNA synthetase inhibitor	-92.74
mycophenolic-acid	Dehydrogenase inhibitor	-72.23
BX-795	IKK inhibitor	-72.08
fluticasone	Glucocorticoid receptor agonist	-70.48
prostratin	PKC activator	-65.66
PD-123319	Angiotensin receptor antagonist	-64.04
phenylbutyrate	HDAC inhibitor	-63.48
desoxypeganine	Acetylcholinesterase inhibitor	-60.79
SA-63133	-666	-60.01
indinavir	HIV protease inhibitor	-56.37
salubrinal	Eukaryotic translation initiation factor inhibitor	-55.74
ivermectin	GABA receptor agonist	-54.2
I-OMe-AG-538	IGF-1 inhibitor	-53.21
reserpine	Vesicular monoamine transporter inhibitor	-51.63
ampicillin	Bacterial cell wall synthesis inhibitor	-49.67
SB-200646	Serotonin receptor antagonist	-49.45
L-165041	PPAR receptor agonist	-48.31
metaxalone	Muscle relaxant	-47.58
clebopride	Dopamine receptor antagonist	-45.53
nomifensine	Dopamine uptake inhibitor	-44.01
quinoclamine	Algicide	-43.58
androstanol	CAR antagonist	-42.13
daidzein	Estrogen receptor agonist	-41.34
cytochalasin-d	Actin polymerization inhibitor	-40.58
NTNCB	Neuropeptide receptor antagonist	-39.74
indirubin	CDK inhibitor	-39.47
GW-583340	EGFR inhibitor	-37.29
umbelliferone	Cyclooxygenase inhibitor	-37.19
L-BSO	Glutathione transferase inhibitor	-36.81
TUL-XXI039	Serine/threonine kinase inhibitor	-36.46
naftopidil	Adrenergic receptor antagonist	-36.19
GR-103691	Dopamine receptor antagonist	-35.84
vinburnine	Adrenergic receptor antagonist	-34.21
gossypol	BCL inhibitor	-33.05
U-99194	Dopamine receptor antagonist	-32.84
tropanyl-3,5-dimethylbenzoate	Serotonin receptor antagonist	-31.72
PIK-90	PI3K inhibitor	-31.34
thioperamide	Histamine receptor antagonist	-31.3
dihydro-7-desacetyldeoxygedunin	HSP inhibitor	-31.14
Cyclo-[Arg-Gly-Asp-D-Phe-Val]	integrin antagonist	-31.1
ingenol	PKC activator	-30.96
NNC-55-0396	T-type calcium channel blocker	-30.95
navitoclax	BCL inhibitor	-30.94
pentylenetetrazol	GABA receptor antagonist	-30.83
BMS-182874	Endothelin receptor antagonist	-30.35
BRD-K06817181	JAK inhibitor	-29.83
L-152804	Neuropeptide receptor antagonist	-29.67
tyrphostin-47	EGFR inhibitor	-29.46
diclofenamide	Carbonic anhydrase inhibitor	-28.7
cytosporone-b	NUR77 receptor agonist	-28.63
mestinon	Cholinesterase inhibitor	-27.47
metrizamide	Radiopaque medium	-27.41
hydroquinine	Antiarrhythmic	-26.1
serdemetan	MDM inhibitor	-26.07
BRL-37344	Adrenergic receptor agonist	-26.05
procainamide	Sodium channel blocker	-25.95
scandenin	Plant compound with antimicrobial activity	-25.57
NPC-15199	ICAM1 antagonist	-25.54
rhodomyrtoxin	Cytotoxic agent	-25.31
YM-155	Survivin inhibitor	-25.22
sunitinib	FLT3 inhibitor	-25.15
TCPOBOP	CAR agonist	-24.41
midostaurin	FLT3 inhibitor	-24.17
EBPC	Aldose reductase inhibitor	-24.08
isogedunin	HSP inhibitor	-23.93
BRD-K41143549	Glutamate receptor antagonist	-23.18
myriocin	Serine palmitoyltransferase inhibitor	-22.61
chloroxine	Opioid receptor antagonist	-22.07
PP-30	RAF inhibitor	-21.67
carmoxirole	Dopamine receptor agonist	-21.62
meptazinol	Opioid receptor agonist	-21.6
amsacrine	Topoisomerase inhibitor	-21.46
osthol	Calcium channel blocker	-21.24
FR-139317	Endothelin receptor antagonist	-20.3
thapsigargin	ATPase inhibitor	-19.92
RO-90-7501	Beta amyloid inhibitor	-19.87
eudesmic-acid	-666	-19.77
rifaximin	RNA synthesis inhibitor	-19.71
diprotin-a	Dipeptidyl peptidase inhibitor	-19.27
KN-62	Calcium-calmodulin dependent protein kinase inhibitor	-19.23
WAY-170523	Metalloproteinase inhibitor	-18.72
GR-144053	Integrin antagonist	-18.56
SB-216641	Serotonin receptor antagonist	-18.47
digitoxin	ATPase inhibitor	-18.24
NU-7441	DNA dependent protein kinase inhibitor	-18.22
NS-3694	Glutamate receptor antagonist	-18.16
J-104129	Acetylcholine receptor antagonist	-18.08
tyrphostin-AG-527	Protein tyrosine kinase inhibitor	-17.94
MRS-1220	Adenosine receptor antagonist	-17.8
scopoline	Acetylcholine receptor antagonist	-17.67
mifepristone	Glucocorticoid receptor antagonist	-17.12
benperidol	Dopamine receptor antagonist	-16.94
H-7	PKA inhibitor	-16.83
PI-828	PI3K inhibitor	-16.61
indatraline	Norepinephrine transporter inhibitor	-15.71
lumicolchicine	Colchicine isomer, non-binder of microtubules	-15.65
esomeprazole	ATPase inhibitor	-15.54
nonoxynol-9	Membrane integrity inhibitor	-14.86
RX-821002	Adrenergic receptor antagonist	-14.44
bosentan	Endothelin receptor antagonist	-14.3
guanfacine	Adrenergic receptor agonist	-14
flavanone	11-beta-HSD1 inhibitor	-14
cyproterone	Androgen receptor antagonist	-13.94
hydrastine	Tyrosine hydroxylase inhibitor	-13.88
QS-11	ARFGAP inhibitor	-13.6
CP-724714	EGFR inhibitor	-13.43
LFM-A12	EGFR inhibitor	-12.96
thiazolopyrimidine	CDC inhibitor	-12.61
perindopril	ACE inhibitor	-12.6
cinchonine	P-glycoprotein inhibitor	-12.4
W-5	Calmodulin antagonist	-12.24
dihydroergocristine	Adrenergic receptor antagonist	-12.24
fraxetin	Antioxidant	-11.78
cyclopamine	Smoothened receptor antagonist	-11.71
diphenyleneiodonium	Nitric oxide synthase inhibitor	-10.89
RS-100329	Adrenergic receptor antagonist	-10.69
robustic-acid	cAMP inhibitor	-10.58
VU-0365114-2	M5 modulator	-10.53
alimemazine	Histamine receptor agonist	-10.35
linsitinib	IGF-1 inhibitor	-10.24
KF-38789	P-selectin inhibitor	-10.2
HU-211	Glutamate receptor antagonist	-10.13
fexofenadine	Histamine receptor antagonist	-10.02
terbinafine	Fungal squalene epoxidase inhibitor	-9.72
daphnetin	Protein kinase inhibitor	-9.68
famotidine	Histamine receptor antagonist	-9.62
kenpaullone	CDK inhibitor	-9.6
pefloxacin	Bacterial DNA gyrase inhibitor	-9.58
tyrphostin-AG-1296	FLT3 inhibitor	-9.41
megestrol	Progesterone receptor agonist	-9.36
etomoxir	Carnitine palmitoyltransferase inhibitor	-9.34
gelsemine	Acetylcholine receptor antagonist	-9.34
metolazone	Carbonic anhydrase inhibitor	-9.31
1,2-dichlorobenzene	Hepatotoxicant	-9.2
KIN001-242	Protein kinase inhibitor	-9.15
diethylcarbamazine	Lipoxygenase inhibitor	-9.12
cyproheptadine	Histamine receptor antagonist	-8.99
dictamnine	Furoquinoline alkaloid	-8.92
KI-8751	VEGFR inhibitor	-8.74
mercaptopurine	Immunosuppressant	-8.65
flupentixol	Dopamine receptor antagonist	-8.57
ON-01910	PLK inhibitor	-8.5
SD-169	p38 MAPK inhibitor	-8.36
WYE-125132	MTOR inhibitor	-8.35
isoxsuprine	Adrenergic receptor agonist	-8.21
alfadolone	GABA receptor agonist	-8.2
psoromic-acid	Ras GTPase inhibitor	-8.04
nortriptyline	Tricyclic antidepressant	-7.91
N6-cyclopentyladenosine	Adenosine receptor agonist	-7.87
kinetin-riboside	Apoptosis stimulant	-7.8
AY-9944	Hedgehog pathway modulator	-7.63
dibenzoylmethane	Antineoplastic	-7.58
praziquantel	Anthelmintic	-7.51
dobutamine	Adrenergic receptor agonist	-7.49
racecadotril	Enkephalinase inhibitor	-7.44
CS-1657	PARP inhibitor	-7.18
iproniazid	Monoamine oxidase inhibitor	-7.15
marbofloxacin	Bacterial DNA gyrase inhibitor	-7.14
CD-437	Retinoid receptor agonist	-7.07
diphemanil	Acetylcholine receptor antagonist	-7.03
homochlorcyclizine	Antihistamine	-6.69
icosapent	Platelet aggregation inhibitor	-6.57
velnacrine	cholinesterase inhibitor	-6.45
carbetocin	Oxytocin receptor agonist	-6.42
benzyl-quinazolin-4-yl-amine	EGFR inhibitor	-6.06
icilin	TRPV agonist	-6.06
TCB2	Serotonin receptor agonist	-6.03
calmidazolium	Calcium channel blocker	-6.01
L-689560	Glutamate receptor antagonist	-5.94
maraviroc	CC chemokine receptor antagonist	-5.92
phenylbutazone	Cyclooxygenase inhibitor	-5.92
bufalin	ATPase inhibitor	-5.88
FR-180204	-666	-5.88
PD-169316	p38 MAPK inhibitor	-5.83
fenbendazole	Tubulin inhibitor	-5.77
loratadine	Histamine receptor antagonist	-5.76
phentermine	Dopamine uptake inhibitor	-5.74
GANT-61	GLI antagonist	-5.67
deforolimus	MTOR inhibitor	-5.67
vidarabine	Antiviral	-5.66
amitriptyline	Norepinephrine inhibitor	-5.57
zaldaride	Calmodulin antagonist	-5.53
RS-67333	Serotonin receptor partial agonist	-5.43
phenamil	TRPV antagonist	-5.26
mestanolone	Androgenic steroid	-5.22
MRS-1845	Calcium channel blocker	-5.18
rhodomyrtoxin-b	sodium fluorescein uptake inhibitor	-5.08
piperacetazine	Dopamine receptor antagonist	-5.05
nateglinide	Insulin secretagogue	-5.04
antimycin-a	ATP synthase inhibitor	-5.02
sumatriptan	Serotonin receptor agonist	-4.98
ipriflavone	Bone resorption inhibitor	-4.93
mebendazole	Tubulin inhibitor	-4.87
metixene	Acetylcholine receptor antagonist	-4.83
meropenem	Bacterial cell wall synthesis inhibitor	-4.79
ZD-7155	Angiotensin receptor antagonist	-4.76
PSB-1115	Adenosine receptor antagonist	-4.76
naringenin	Aromatase inhibitor	-4.74
BAPTA-AM	Potassium channel blocker	-4.72
taurodeoxycholic-acid	Bile acid	-4.69
teicoplanin	Bacterial cell wall synthesis inhibitor	-4.67
GW-9662	PPAR receptor antagonist	-4.65
meclocycline	Bacterial 30S ribosomal subunit inhibitor	-4.62
nizatidine	Histamine receptor antagonist	-4.52
altretamine	DNA synthesis inhibitor	-4.49
VU-0418947-2	HIF modulator	-4.44
VU-0400195-3	Glutamate receptor modulator	-4.44
lupanine	Sodium channel blocker	-4.37
ifenprodil	Adrenergic receptor antagonist	-4.3
piceatannol	SYK inhibitor	-4.3
l-stepholidine	Dopamine receptor antagonist	-4.3
cetirizine	Histamine receptor antagonist	-4.3
propylpyrazole	Estrogen receptor agonist	-4.09
cortisone	Glucocorticoid receptor agonist	-4.08
niridazole	Phosphofructokinase inhibitor	-4.07
o-3M3FBS	phospholipase activator	-4.05
pheniramine	Histamine receptor antagonist	-3.88
heraclenol	Vitamin K antagonist	-3.84
dicloxacillin	Bacterial cell wall synthesis inhibitor	-3.84
LY-2183240	FAAH inhibitor	-3.84
lobaric-acid	Tyrosine phosphatase inhibitor	-3.76
vecuronium	Acetylcholine receptor antagonist	-3.74
LE-135	Retinoid receptor agonist	-3.72
sirolimus	MTOR inhibitor	-3.67
sertraline	Serotonin receptor antagonist	-3.6
pseudoephedrine	Adrenergic receptor agonist	-3.59
FPL-64176	Calcium channel activator	-3.49
K3644	Kinesin-like spindle protein inhibitor	-3.46
tetradecylthioacetic-acid	Lipid peroxidase inhibitor	-3.45
tegaserod	Serotonin receptor partial agonist	-3.42
TER-14687	Inhibitor of translocation of PKCq in T cells	-3.35
lobeline	Acetylcholine receptor antagonist	-3.29
raltegravir	HIV integrase inhibitor	-3.28
norethindrone	Progesterone receptor agonist	-3.28
bosutinib	ABL inhibitor	-3.21
cladribine	Adenosine deaminase inhibitor	-3.21
mirin	MRE11A exonuclease inhibitor	-3.17
carpindolol	Adrenergic receptor antagonist	-3.17
niflumic-acid	Cyclooxygenase inhibitor	-3.11
CP-94253	Serotonin receptor agonist	-3.07
arecaidine	Acetylcholine receptor agonist	-3.03
SB-218078	CHK inhibitor	-2.92
lasalocid	Bacterial permeability inducer	-2.92
EHNA	Adenosine deaminase inhibitor	-2.91
oxymetholone	Androgen receptor agonist	-2.89
CGP-52432	GABA receptor antagonist	-2.89
rutin	Antioxidant	-2.85
ICI-204448	Opioid receptor agonist	-2.85
salvinorin-a	Opioid receptor agonist	-2.82
SNS-314	Aurora kinase inhibitor	-2.82
TW-37	BCL inhibitor	-2.82
FIT	Opioid receptor agonist	-2.8
trapidil	PDGFR receptor inhibitor	-2.78
tracazolate	GABA receptor modulator	-2.78
berbamine	Calmodulin antagonist	-2.78
RS-56812	Serotonin receptor partial agonist	-2.75
QX-314	Sodium channel blocker	-2.75
profenamine	Butyrylcholinesterase inhibitor	-2.73
quipazine	Serotonin receptor agonist	-2.71
cyclopiazonic-acid	ATPase inhibitor	-2.68
BRD-K66782112	Histamine receptor antagonist	-2.64
JNJ-26854165	HDAC inhibitor	-2.57
pazopanib	KIT inhibitor	-2.57
vincristine	Tubulin inhibitor	-2.53
WAY-629	Serotonin receptor agonist	-2.52
troglitazone	Insulin sensitizer	-2.5
tomelukast	Leukotriene receptor antagonist	-2.5
AZ-628	RAF inhibitor	-2.48
pimozide	Dopamine receptor antagonist	-2.42
CAY-10618	NAMPT inhibitor	-2.4
picrotoxin	GABA receptor antagonist	-2.4
lonidamine	Glucokinase inhibitor	-2.4
TGX-221	PI3K inhibitor	-2.29
tangeritin	Cell cycle inhibitor	-2.29
arvanil	TRPV agonist	-2.29
rifampicin	RNA polymerase inhibitor	-2.26
malonoben	Protein tyrosine kinase inhibitor	-2.23
JAK3-inhibitor-I	JAK inhibitor	-2.22
roscovitine	CDK inhibitor	-2.22
BAY-36-7620	Glutamate receptor antagonist	-2.18
SB-218795	Tachykinin antagonist	-2.17
ticlopidine	Purinergic receptor antagonist	-2.16
enalaprilat	ACE inhibitor	-2.15
HG-5-88-01	Protein kinase inhibitor	-2.15
procaterol	Adrenergic receptor agonist	-2.15
benzopurpurin-4b	HIV entry inhibitor	-2.15
PLX-4720	RAF inhibitor	-2.15
U-0124	MEK inhibitor	-2.09
HNHA	HDAC inhibitor	-2.08
bendroflumethiazide	Sodium/potassium/chloride transporter inhibitor	-2.08
KUC103898N	-666	-2.06
PNU-96415E	Dopamine receptor antagonist	-2.04
benzanthrone	Aromatic hydrocarbon derivative	-2.04
spiperone	Dopamine receptor antagonist	-2.04
esculin	Antioxidant	-2.02
BD-1063	Sigma receptor antagonist	-2.01
anabasine	Acetylcholine receptor agonist	-2.01
alverine	Muscle relaxant	-2.01
dexchlorpheniramine	Histamine receptor antagonist	-1.97
pirfenidone	TGF beta receptor inhibitor	-1.97
MAZ-51	VEGFR inhibitor	-1.95
nifurtimox	DNA inhibitor	-1.94
lacidipine	Calcium channel blocker	-1.93
roxatidine	Histamine receptor antagonist	-1.92
PP-2	SRC inhibitor	-1.87
SA-1478088	-666	-1.87
DMBI	PDGFR receptor inhibitor	-1.87
clofazimine	GK0582 inhibitor	-1.86
RG-14620	EGFR inhibitor	-1.84
perhexiline	Carnitine palmitoyltransferase inhibitor	-1.83
maprotiline	Norepinephrine reuptake inhibitor	-1.83
PAC-1	Caspase activator	-1.83
ZK-164015	Estrogen receptor antagonist	-1.82
BJM-CSC-19	MEK inhibitor	-1.8
PHA-665752	c-Met inhibitor	-1.8
caffeic-acid	Lipoxygenase inhibitor	-1.8
BP-554	Serotonin receptor agonist	-1.8
L-161982	Prostanoid receptor antagonist	-1.8
solanine	Acetylcholinesterase inhibitor	-1.76
LY-288513	CCK receptor antagonist	-1.76
CI-966	GAT inhibitor	-1.76
labetalol	Adrenergic receptor antagonist	-1.73
TAK-715	p38 MAPK inhibitor	-1.66
L-745870	Dopamine receptor antagonist	-1.66
diclofenac	Cyclooxygenase inhibitor	-1.66
prunetin	Breast cancer resistance protein inhibitor	-1.64
desloratadine	Histamine receptor antagonist	-1.62
RO-25-6981	Ionotropic glutamate receptor antagonist	-1.62
coumarin	Vitamin K antagonist	-1.62
nimesulide	Cyclooxygenase inhibitor	-1.61
SIB-1757	Glutamate receptor antagonist	-1.59
diethyltoluamide	DEET activator of fly antenna ionotropic receptor IR40a	-1.59
stavudine	DNA directed DNA polymerase inhibitor	-1.59
practolol	Adrenergic receptor antagonist	-1.55
austricine	Hypolipidemic	-1.51
menadione	Mitochondrial DNA polymerase inhibitor	-1.51
ezetimibe	Niemann-Pick C1-like 1 protein antagonist	-1.48
zosuquidar	P-glycoprotein inhibitor	-1.46
GBR-13069	Dopamine uptake inhibitor	-1.44
mephentermine	Adrenergic receptor agonist	-1.44
IB-MECA	Adenosine receptor agonist	-1.44
ephedrine	Adrenergic receptor agonist	-1.44
dichlorobenzamil	Sodium/calcium exchange inhibitor	-1.43
W-13	Calmodulin antagonist	-1.41
ML-3163	p38 MAPK inhibitor	-1.41
CFM-1571	Guanylate cyclase activator	-1.41
prednisone	Glucocorticoid receptor agonist	-1.41
phenazopyridine	Local anesthetic	-1.41
triciribine	AKT inhibitor	-1.39
penciclovir	DNA directed DNA polymerase inhibitor	-1.37
acarbose	Glucosidase inhibitor	-1.37
linoleamide	ACAT inhibitor	-1.37
andarine	Androgen receptor modulator	-1.34
saclofen	GABA receptor antagonist	-1.34
homosalate	HSP inducer	-1.34
GR-127935	Serotonin receptor antagonist	-1.34
fludroxycortide	Glucocorticoid receptor agonist	-1.34
eriochrome-black-t	Azo dye	-1.34
SU-4312	PDGFR receptor inhibitor	-1.32
VUF-5681	Histamine receptor antagonist	-1.3
econazole	Bacterial cell wall synthesis inhibitor	-1.3
CL-218872	GABA receptor agonist	-1.3
fludrocortisone	Glucocorticoid receptor agonist	-1.3
vitexin	Antioxidant	-1.27
RO-60-0175	Serotonin receptor agonist	-1.27
carprofen	Cyclooxygenase inhibitor	-1.27
buddleoflavonoloside	Acetylcholinesterase inhibitor	-1.27
MBCQ	Phosphodiesterase inhibitor	-1.27
AZD-6482	PI3K inhibitor	-1.26
QL-XI-92	DDR1 inhibitor	-1.23
ZK-93423	Benzodiazepine receptor agonist	-1.23
W-9	Calmodulin antagonist	-1.23
methoprene-acid	Retinoid receptor agonist	-1.23
levcromakalim	Potassium channel activator	-1.23
BCL2-inhibitor	BCL inhibitor	-1.23
dopamine	Dopamine receptor agonist	-1.23
KU-C103871	GSP agonist	-1.2
GW-3965	LXR agonist	-1.2
quercetagetin	PIM inhibitor	-1.16
BMY-7378	Adrenergic receptor antagonist	-1.16
flurbiprofen	Cyclooxygenase inhibitor	-1.16
norethisterone	Progesterone receptor agonist	-1.13
L-750667	Dopamine receptor antagonist	-1.13
H-89	PKA inhibitor	-1.13
BAY-59-3074	Cannabinoid receptor partial agonist	-1.13
LY-294002	MTOR inhibitor	-1.13
KIN001-127	ITK inhibitor	-1.13
esmolol	Adrenergic receptor antagonist	-1.09
epigallocatechin	Nitric oxide synthase inhibitor	-1.09
dydrogesterone	Progesterone receptor agonist	-1.09
nitazoxanide	Pyruvate ferredoxin oxidoreductase inhibitor	-1.06
IWR-1-ENDO	PARP inhibitor	-1.06
indole	aryl hydrocarbon receptor agonist	-1.06
proguanil	Dihydrofolate reductase inhibitor	-1.06
glycodeoxycholic-acid	Apoptosis stimulant	-1.06
cerivastatin	HMGCR inhibitor	-1.02
axitinib	PDGFR receptor inhibitor	-1.02
SYK-inhibitor	SYK inhibitor	-1.02
SDZ-205-557	Serotonin receptor antagonist	-1.02
SCH-23390	Dopamine receptor antagonist	-1.02
EMD-386088	Serotonin receptor agonist	-1.02
imiquimod	TLR agonist	-0.99
L-690330	Inositol monophosphatase inhibitor	-0.96
RS-45041-190	Imidazoline receptor agonist	-0.95
erythrosine	Coloring agent	-0.95
selumetinib	MEK inhibitor	-0.95
reversine	Aurora kinase inhibitor	-0.94
SKF-86002	p38 MAPK inhibitor	-0.93
paxilline	Potassium channel blocker	-0.93
nefazodone	Adrenergic inhibitor	-0.92
BAX-channel-blocker	Cytochrome C release inhibitor	-0.92
estriol	Estrogen receptor agonist	-0.92
tolterodine	Acetylcholine receptor antagonist	-0.88
NGB-2904	Dopamine receptor antagonist	-0.88
thiostrepton	FOXM1 inhibitor	-0.85
SR-57227A	Serotonin receptor agonist	-0.85
RHC-80267	Triacylglycerol lipase inhibitor	-0.85
clocortolone	Glucocorticoid receptor agonist	-0.85
ambroxol	Sodium channel blocker	-0.85
iocetamic-acid	Radiopaque medium	-0.85
KB-R7943	Sodium/calcium exchange inhibitor	-0.83
T-0070907	PPAR receptor antagonist	-0.81
PCA-4248	Platelet activating factor receptor antagonist	-0.81
IAA-94	Chloride channel blocker	-0.81
proscillaridin	ATPase inhibitor	-0.81
fluvastatin	HMGCR inhibitor	-0.81
KU-55933	ATM kinase inhibitor	-0.81
DL-PDMP	Glucosyltransferase inhibitor	-0.81
nifedipine	Calcium channel blocker	-0.81
lomerizine	Calcium channel blocker	-0.79
nifekalant	Potassium channel blocker	-0.78
L-733060	Tachykinin antagonist	-0.78
SRC-kinase-inhibitor-I	SRC inhibitor	-0.78
O-2050	Cannabinoid receptor antagonist	-0.76
erlotinib	EGFR inhibitor	-0.74
temsirolimus	MTOR inhibitor	-0.74
racephedrine	Adrenergic receptor agonist	-0.74
teniposide	Topoisomerase inhibitor	-0.74
PSB-36	Adenosine receptor antagonist	-0.74
zolpidem	Benzodiazepine receptor agonist	-0.71
formestane	Aromatase inhibitor	-0.7
SB-415286	Glycogen synthase kinase inhibitor	-0.7
propafenone	Antiarrhythmic	-0.7
fluprostenol	Prostanoid receptor agonist	-0.7
lysylphenylalanyl-tyrosine	Heparin activation inhibitor	-0.68
GR-113808	Serotonin receptor antagonist	-0.67
flavoxate	Acetylcholine receptor antagonist	-0.67
ruxolitinib	JAK inhibitor	-0.63
lidoflazine	Calcium channel blocker	-0.63
eriodictyol	Cytochrome P450 inhibitor	-0.63
oxfendazole	Anthelmintic	-0.63
chaetocin	Histone lysine methyltransferase inhibitor	-0.63
AGK-2	SIRT inhibitor	-0.61
nitrendipine	Calcium channel blocker	-0.6
EMF-BCA1-64	Caspase inhibitor	-0.6
dibutyrylcyclic-gmp	cGMP analog	-0.6
testosterone	androgen receptor agonist	-0.6
mevastatin	HMGCR inhibitor	-0.6
L-693403	Sigma receptor agonist	-0.6
calycanthine	GABA release inhibitor	-0.6
prostaglandin-b2	cAMP inhibitor	-0.56
lysergol	Ergoline alkaloid	-0.56
oxybuprocaine	Local anesthetic	-0.56
emodic-acid	Laxative	-0.56
dihydrosamidin	Phospholipase inhibitor	-0.56
CITCO	CAR agonist	-0.56
asiatic-acid	Apoptosis stimulant	-0.56
quinethazone	Thiazide diuretic	-0.56
topiramate	Carbonic anhydrase inhibitor	-0.53
MK-2206	AKT inhibitor	-0.53
NSC-3852	HDAC inhibitor	-0.53
AG-494	EGFR inhibitor	-0.53
QX-222	Sodium channel blocker	-0.53
propentofylline	Adenosine reuptake inhibitor	-0.53
L-701324	Glutamate receptor antagonist	-0.53
targinine	Nitric oxide synthase inhibitor	-0.51
diphencyprone	Immunostimulant	-0.5
kitasamycin	Protein synthesis inhibitor	-0.49
honokiol	AKT inhibitor	-0.49
VER-155008	HSP inhibitor	-0.49
betulinic-acid	Apoptosis stimulant	-0.49
GW-4064	FXR agonist	-0.49
meclozine	CAR agonist	-0.49
alpha-estradiol	Estrogen receptor agonist	-0.46
SB-225002	CC chemokine receptor antagonist	-0.46
cyclopenthiazide	Thiazide diuretic	-0.46
selamectin	Nematocide	-0.46
protopine	Histamine receptor antagonist	-0.46
marmesin	Angiogenesis inhibitor	-0.46
FGIN-1-27	Inositol monophosphatase inhibitor	-0.46
venlafaxine	Adrenergic inhibitor	-0.46
rilmenidine	Imidazoline receptor agonist	-0.42
terazosin	Adrenergic receptor antagonist	-0.42
CHEMBL-374350	NFkB pathway inhibitor	-0.42
brinzolamide	Carbonic anhydrase inhibitor	-0.39
zoxazolamine	Myorelaxant	-0.39
podophyllotoxin	Microtubule inhibitor	-0.39
ZSTK-474	PI3K inhibitor	-0.39
resveratrol	Cytochrome P450 inhibitor	-0.39
RO-28-1675	Glucokinase activator	-0.39
pyrimethamine	Dihydrofolate reductase inhibitor	-0.35
PD-102807	Acetylcholine receptor antagonist	-0.35
carteolol	Adrenergic receptor antagonist	-0.35
BD-1008	Sigma receptor antagonist	-0.35
fipronil	GABA gated chloride channel blocker	-0.35
cyclopentolate	Acetylcholine receptor antagonist	-0.35
mecillinam	Bacterial cell wall synthesis inhibitor	-0.34
M2-PK-activator	-666	-0.32
ibuprofen	Cyclooxygenase inhibitor	-0.32
rofecoxib	Cyclooxygenase inhibitor	-0.32
fluspirilene	Dopamine receptor antagonist	-0.32
amperozide	Dopamine receptor antagonist	-0.32
GDC-0941	PI3K inhibitor	-0.32
VU-0418946-1	HIF modulator	-0.32
cytochalasin-b	Microtubule inhibitor	-0.32
dovitinib	EGFR inhibitor	-0.28
DPPE	Histamine receptor antagonist	-0.28
doconexent	PPAR receptor agonist	-0.28
terfenadine	Histamine receptor antagonist	-0.28
triflupromazine	Dopamine receptor antagonist	-0.28
crizotinib	ALK inhibitor	-0.25
16,16-dimethylprostaglandin-e2	Prostanoid receptor agonist	-0.25
JLK-6	Gamma secretase inhibitor	-0.25
laudanosine	Central nervous system agent	-0.25
gitoxigenin	ATPase inhibitor	-0.25
aliskiren	Antihypertensive	-0.25
zafirlukast	Leukotriene receptor antagonist	-0.25
lansoprazole	ATPase inhibitor	-0.23
isocarboxazid	Monoamine oxidase inhibitor	-0.21
GW-405833	Cannabinoid receptor agonist	-0.21
tyrphostin-1	EGFR inhibitor	-0.21
risperidone	Dopamine receptor antagonist	-0.21
valdecoxib	Cyclooxygenase inhibitor	-0.21
niclosamide	DNA replication inhibitor	-0.21
modafinil	Adrenergic receptor agonist	-0.18
trimetozine	Sedative	-0.18
r(-)-propylnorapomorphine	Dopamine receptor agonist	-0.18
indirubin	CDK inhibitor	-0.18
albendazole	Anthelmintic	-0.18
atomoxetine	Norepinephrine transporter inhibitor	-0.14
remoxipride	Dopamine receptor antagonist	-0.14
hexylcaine	Sodium channel blocker	-0.14
AM-580	Retinoid receptor agonist	-0.14
rhamnetin	HDAC inhibitor	-0.14
paclitaxel	Tubulin inhibitor	-0.14
clemastine	Histamine receptor antagonist	-0.14
cilostazol	Phosphodiesterase inhibitor	-0.14
hymecromone	Monoamine oxidase inhibitor	-0.14
spironolactone	Mineralocorticoid receptor antagonist	-0.14
clomifene	Estrogen receptor antagonist	-0.14
brimonidine	Adrenergic receptor agonist	-0.14
AM-251	Cannabinoid receptor antagonist	-0.14
itraconazole	Cytochrome P450 inhibitor	-0.11
nafcillin	Bacterial cell wall synthesis inhibitor	-0.11
ubenimex	Leukotriene inhibitor	-0.11
bumetanide	Solute carrier family member inhibitor	-0.11
molindone	Dopamine receptor antagonist	-0.11
motesanib	KIT inhibitor	-0.07
phenothiazine	Dopamine receptor antagonist	-0.07
bucladesine	Adenosine receptor agonist	-0.07
droperidol	Dopamine receptor antagonist	-0.07
calcipotriol	Vitamin D receptor agonist	-0.07
fluoxetine	Selective serotonin reuptake inhibitor (SSRI)	-0.07
orciprenaline	Adrenergic receptor agonist	-0.07
trimipramine	Norepinephrine reuptake inhibitor	-0.07
diphenhydramine	Histamine receptor antagonist	-0.04
GW-9508	Free fatty acid receptor agonist	-0.04
etomidate	GABA receptor modulator	-0.04
doxylamine	Histamine receptor antagonist	-0.04
clozapine	Dopamine receptor antagonist	-0.04
LFM-A13	BTK inhibitor	-0.03
fluticasone	Glucocorticoid receptor agonist	-0.03
clobenpropit	Histamine receptor antagonist	-0.03
pizotifen	Serotonin receptor antagonist	-0.03
imiloxan	Adrenergic receptor antagonist	-0.03
icariin	Phosphodiesterase inhibitor	-0.03
betamethasone	Glucocorticoid receptor agonist	-0.03
arcyriaflavin-a	CDK inhibitor	-0.03
haloperidol	Dopamine receptor antagonist	-0.03
purmorphamine	Smoothened receptor agonist	-0.02
PK-11195	Benzodiazepine receptor antagonist	-0.02
carvedilol	Adrenergic receptor antagonist	-0.02
amiodarone	Potassium channel blocker	-0.02
bepridil	Calcium channel blocker	-0.02
primidone	GABA receptor antagonist	-0.02
raltitrexed	Thymidylate synthase inhibitor	-0.02
losartan	Angiotensin receptor antagonist	-0.02
tosufloxacin	Bacterial DNA gyrase inhibitor	-0.01
chlorambucil	DNA inhibitor	-0.01
tolbutamide	ATP channel blocker	-0.01

## Sheet: Sheet 6
Drugs with negative CMap connectivity to the AD-relevant tissue GTEx signature
compound_name	compound_description	connectivity_score
CAY-10618	NAMPT inhibitor	-89.01
bufalin	ATPase inhibitor	-86.87
vidarabine	Antiviral	-81.33
PP-30	RAF inhibitor	-78.94
ivermectin	GABA receptor agonist	-71.68
rhodomyrtoxin-b	sodium fluorescein uptake inhibitor	-70.05
pentylenetetrazol	GABA receptor antagonist	-68.17
ingenol	PKC activator	-67.25
prostratin	PKC activator	-67.19
salubrinal	Eukaryotic translation initiation factor inhibitor	-62.38
deforolimus	MTOR inhibitor	-61.71
heliomycin	ATP synthase inhibitor	-60.63
digitoxin	ATPase inhibitor	-59.85
N6-cyclopentyladenosine	Adenosine receptor agonist	-59.41
dibenzoylmethane	Antineoplastic	-59.2
quinoclamine	Algicide	-58.87
QL-XII-47	BTK inhibitor	-58.13
amsacrine	Topoisomerase inhibitor	-56.43
lasalocid	Bacterial permeability inducer	-56.24
BX-795	IKK inhibitor	-55.25
rhodomyrtoxin	Cytotoxic agent	-55.07
fludroxycortide	Glucocorticoid receptor agonist	-54.98
articaine	Local anesthetic	-53.35
roxatidine	Histamine receptor antagonist	-51.91
lacidipine	Calcium channel blocker	-51.77
antimycin-a	ATP synthase inhibitor	-51.34
BMS-182874	Endothelin receptor antagonist	-50.99
fenbendazole	Tubulin inhibitor	-50.59
desoxypeganine	Acetylcholinesterase inhibitor	-50.19
suloctidil	Adrenergic receptor antagonist	-49.87
2-aminopurine	Serine/threonine kinase inhibitor	-49.7
TUL-XXI039	Serine/threonine kinase inhibitor	-47.35
SB-200646	Serotonin receptor antagonist	-46.88
calycanthine	GABA release inhibitor	-46.3
vinburnine	Adrenergic receptor antagonist	-45.54
tropanyl-3,5-dimethylbenzoate	Serotonin receptor antagonist	-44.92
indolophenanthridine	CALY activator	-44.69
isorotenone	Mitochondrial complex I inhibitor	-44.27
clofarabine	Ribonucleoside reductase inhibitor	-44.11
CD-437	Retinoid receptor agonist	-43.1
scopoline	Acetylcholine receptor antagonist	-42.93
cinobufagin	ATPase inhibitor	-42.44
SA-63133	-666	-42.44
LFM-A12	EGFR inhibitor	-42.11
SNS-314	Aurora kinase inhibitor	-41.54
eudesmic-acid	-666	-41.52
U-99194	Dopamine receptor antagonist	-41.34
chloroxine	Opioid receptor antagonist	-41.34
WZ-4-145	EGFR inhibitor	-41.17
meptazinol	Opioid receptor agonist	-40.85
hydroxycholesterol	LXR agonist	-39.87
nonoxynol-9	Membrane integrity inhibitor	-39.78
cyproheptadine	Histamine receptor antagonist	-39.54
Cyclo-[Arg-Gly-Asp-D-Phe-Val]	integrin antagonist	-39.5
TCPOBOP	CAR agonist	-39.17
sunitinib	FLT3 inhibitor	-38.99
clofazimine	GK0582 inhibitor	-38.82
nTZDpa	PPAR receptor agonist	-38.26
cefalexin	Bacterial cell wall synthesis inhibitor	-37.98
calmidazolium	Calcium channel blocker	-37.66
L-BSO	Glutathione transferase inhibitor	-37.42
digitoxigenin	ATPase inhibitor	-36.71
ZK-93423	Benzodiazepine receptor agonist	-36.38
lonidamine	Glucokinase inhibitor	-36.05
mephentermine	Adrenergic receptor agonist	-35.87
BRD-A80383043	Glutamate receptor agonist	-35.43
hypericin	Tyrosine kinase inhibitor	-35.05
dilazep	Adenosine reuptake inhibitor	-34.1
HU-211	Glutamate receptor antagonist	-33.81
JAK3-inhibitor-VI	JAK inhibitor	-33.71
metixene	Acetylcholine receptor antagonist	-33.58
reserpine	Vesicular monoamine transporter inhibitor	-33.41
megestrol	Progesterone receptor agonist	-33.3
FIT	Opioid receptor agonist	-33.29
daphnetin	Protein kinase inhibitor	-32.97
chaetocin	Histone lysine methyltransferase inhibitor	-32.83
homochlorcyclizine	Antihistamine	-32.79
mestinon	Cholinesterase inhibitor	-32.41
isogedunin	HSP inhibitor	-32.38
pefloxacin	Bacterial DNA gyrase inhibitor	-31.97
tamibarotene	Retinoid receptor agonist	-31.09
PI-828	PI3K inhibitor	-30.44
fluticasone	Glucocorticoid receptor agonist	-28.22
coumarin	Vitamin K antagonist	-27.9
rhamnetin	HDAC inhibitor	-27.87
ascorbic-acid	Antioxidant	-27.69
periplocymarin	Apoptosis stimulant	-27.65
HNHA	HDAC inhibitor	-27.42
ouabain	ATPase inhibitor	-27.19
ampicillin	Bacterial cell wall synthesis inhibitor	-27.17
menadione	Mitochondrial DNA polymerase inhibitor	-26.69
diprotin-a	Dipeptidyl peptidase inhibitor	-26.28
thioperamide	Histamine receptor antagonist	-26.16
arctigenin	MEK inhibitor	-26.06
L-161982	Prostanoid receptor antagonist	-26.06
YM-298198	Glutamate receptor antagonist	-25.96
GBR-13069	Dopamine uptake inhibitor	-25.37
GR-144053	Integrin antagonist	-24.61
cyproterone	Androgen receptor antagonist	-24.53
BAY-59-3074	Cannabinoid receptor partial agonist	-24.32
mupirocin	Isoleucyl-tRNA synthetase inhibitor	-24.2
5-nonyloxytryptamine	Serotonin receptor agonist	-23.84
RS-45041-190	Imidazoline receptor agonist	-23.66
PP-2	SRC inhibitor	-23.63
mirin	MRE11A exonuclease inhibitor	-23.43
SC-9	Protein tyrosine kinase activator	-23.43
serdemetan	MDM inhibitor	-23.09
10H-phenothiazin-10-yl)(p-tolyl)methanone	Butyrylcholinesterase inhibitor	-22.95
meclocycline	Bacterial 30S ribosomal subunit inhibitor	-22.26
androstanol	CAR antagonist	-21.87
FPL-64176	Calcium channel activator	-21.52
tyrphostin-AG-1296	FLT3 inhibitor	-21.13
dydrogesterone	Progesterone receptor agonist	-21.09
etilefrine	Adrenergic receptor agonist	-21.09
norethisterone	Progesterone receptor agonist	-21.08
vindesine	Tubulin inhibitor	-20.98
tunicamycin	GLCNAC phosphotransferase inhibitor	-20.79
dexchlorpheniramine	Histamine receptor antagonist	-20.64
triflupromazine	Dopamine receptor antagonist	-20.61
ipriflavone	Bone resorption inhibitor	-20.59
hyperforin	Cyclooxygenase inhibitor	-20.58
pirinixic-acid	PPAR receptor agonist	-20.42
nortriptyline	Tricyclic antidepressant	-20.42
diclofenamide	Carbonic anhydrase inhibitor	-20.05
TER-14687	Inhibitor of translocation of PKCq in T cells	-20.04
CGK-733	ATR kinase inhibitor	-19.67
U-46619	Thromboxane receptor agonist	-19.51
gossypol	BCL inhibitor	-19.48
CP-94253	Serotonin receptor agonist	-19.37
GW-405833	Cannabinoid receptor agonist	-19.36
CGP-71683	Neuropeptide receptor antagonist	-19.29
phenylbutyrate	HDAC inhibitor	-19.2
vitexin	Antioxidant	-18.89
primaquine	Antimalarial	-18.65
acitretin	Retinoid receptor agonist	-18.44
SIB-1893	Glutamate receptor antagonist	-18.33
RO-10-5824	Dopamine receptor agonist	-17.96
thapsigargin	ATPase inhibitor	-17.89
aspirin	Cyclooxygenase inhibitor	-17.89
I-OMe-AG-538	IGF-1 inhibitor	-17.68
NTNCB	Neuropeptide receptor antagonist	-17.48
anabasine	Acetylcholine receptor agonist	-17.41
ataluren	CFTR channel agonist	-17.32
GW-9662	PPAR receptor antagonist	-17.17
BRD-K34608650	Cannabinoid receptor agonist	-17.15
norethindrone	Progesterone receptor agonist	-17.03
ginsenoside	Steroid hormone receptor agonist	-17
YM-155	Survivin inhibitor	-16.93
homoharringtonine	Protein synthesis inhibitor	-16.85
MRS-1845	Calcium channel blocker	-16.57
SB-216641	Serotonin receptor antagonist	-16.57
NNC-55-0396	T-type calcium channel blocker	-16.43
BMY-45778	IP1 prostacyclin receptor agonist	-16.35
anisomycin	DNA synthesis inhibitor	-16.23
puromycin	Protein synthesis inhibitor	-15.94
tetrahydropalmatine	Serotonin release inhibitor	-15.82
KF-38789	P-selectin inhibitor	-15.71
prednisone	Glucocorticoid receptor agonist	-15.67
tropicamide	Acetylcholine receptor antagonist	-15.64
desloratadine	Histamine receptor antagonist	-15.39
mifepristone	Glucocorticoid receptor antagonist	-15.28
propantheline	Acetylcholine receptor antagonist	-15.23
BRD-K06817181	JAK inhibitor	-14.75
trimetozine	Sedative	-14.71
KIN001-127	ITK inhibitor	-14.69
midostaurin	FLT3 inhibitor	-14.43
temsirolimus	MTOR inhibitor	-14.31
amperozide	Dopamine receptor antagonist	-14.23
SB-218078	CHK inhibitor	-14.19
gelsemine	Acetylcholine receptor antagonist	-13.72
L-692585	Growth hormone releasing peptide ligand agonist	-13.71
malonoben	Protein tyrosine kinase inhibitor	-13.55
cyclopamine	Smoothened receptor antagonist	-13.17
VU-0418947-2	HIF modulator	-13.03
CAY-10470	NFkB pathway inhibitor	-12.93
niclosamide	DNA replication inhibitor	-12.91
robustic-acid	cAMP inhibitor	-12.73
L-701324	Glutamate receptor antagonist	-12.65
UBP-302	Glutamate receptor antagonist	-12.64
thiazolidinecarboxylic-acid	Reducing agent	-12.57
carmofur	Thymidylate synthase inhibitor	-12.53
KI-8751	VEGFR inhibitor	-12.31
JNJ-7706621	CDK inhibitor	-12.25
helveticoside	ATPase inhibitor	-12.25
JNK-9L	JNK inhibitor	-12.22
tolmetin	Cyclooxygenase inhibitor	-12.09
WAY-170523	Metalloproteinase inhibitor	-12.05
CGP-37157	L-type calcium channel blocker	-12.01
linoleic-acid	Oxidative stress inducer	-11.9
arecaidine	Acetylcholine receptor agonist	-11.82
PHA-665752	c-Met inhibitor	-11.67
DMAB-anabaseine	Adrenergic receptor agonist	-11.19
lobelanidine	Acetylcholine receptor antagonist	-11.08
cycloheximide	Protein synthesis inhibitor	-11.01
VU-0418946-1	HIF modulator	-10.89
desoxycorticosterone	Mineralocorticoid receptor agonist	-10.8
PLX-4720	RAF inhibitor	-10.78
praziquantel	Anthelmintic	-10.7
indatraline	Norepinephrine transporter inhibitor	-10.67
NS-3694	Glutamate receptor antagonist	-10.63
SA-792709	Retinoid receptor agonist	-10.59
cyclosporin-a	Calcineurin inhibitor	-10.55
floxuridine	DNA synthesis inhibitor	-10.42
phenazopyridine	Local anesthetic	-10.31
MAZ-51	VEGFR inhibitor	-10.3
meclozine	CAR agonist	-9.99
NSC-3852	HDAC inhibitor	-9.86
DPN	Estrogen receptor agonist	-9.71
dofetilide	Potassium channel blocker	-9.6
NPC-15199	ICAM1 antagonist	-9.58
hydrastine	Tyrosine hydroxylase inhibitor	-9.53
amantadine	Glutamate receptor antagonist	-9.37
VU-0365114-2	M5 modulator	-9.2
BRD-K66782112	Histamine receptor antagonist	-9.06
propylpyrazole	Estrogen receptor agonist	-8.98
BCL2-inhibitor	BCL inhibitor	-8.89
GSK-1059615	PI3K inhibitor	-8.88
ON-01910	PLK inhibitor	-8.88
GR-55562	Serotonin receptor antagonist	-8.84
cucurbitacin-i	JAK inhibitor	-8.83
solifenacin	Acetylcholine receptor antagonist	-8.83
RS-17053	Adrenergic receptor antagonist	-8.74
sertraline	Serotonin receptor antagonist	-8.72
profenamine	Butyrylcholinesterase inhibitor	-8.68
loratadine	Histamine receptor antagonist	-8.67
cyclopenthiazide	Thiazide diuretic	-8.51
MBCQ	Phosphodiesterase inhibitor	-8.49
paclitaxel	Tubulin inhibitor	-8.47
thiazolopyrimidine	CDC inhibitor	-8.19
L-152804	Neuropeptide receptor antagonist	-8.03
valproic-acid	HDAC inhibitor	-8.01
zaprinast	Phosphodiesterase inhibitor	-7.99
nelfinavir	HIV protease inhibitor	-7.96
sumatriptan	Serotonin receptor agonist	-7.93
metrizamide	Radiopaque medium	-7.74
thiothixene	Dopamine receptor antagonist	-7.66
AY-9944	Hedgehog pathway modulator	-7.65
flavoxate	Acetylcholine receptor antagonist	-7.65
mycophenolic-acid	Dehydrogenase inhibitor	-7.61
AS-604850	PI3K inhibitor	-7.6
etomoxir	Carnitine palmitoyltransferase inhibitor	-7.59
CDC	Lipoxygenase inhibitor	-7.54
karakoline	Phytotoxin	-7.51
docetaxel	Tubulin inhibitor	-7.47
W-13	Calmodulin antagonist	-7.4
spiramide	Dopamine receptor antagonist	-7.35
fluocinonide	Glucocorticoid receptor agonist	-7.33
dihydro-7-desacetyldeoxygedunin	HSP inhibitor	-7.32
indinavir	HIV protease inhibitor	-7.26
XL-147	PI3K inhibitor	-7.25
WAY-629	Serotonin receptor agonist	-7.2
berbamine	Calmodulin antagonist	-7.11
hinokitiol	Tyrosinase inhibitor	-7.06
pheniramine	Histamine receptor antagonist	-7.01
JTC-801	Opioid receptor antagonist	-6.99
fraxetin	Antioxidant	-6.99
SC-560	Cyclooxygenase inhibitor	-6.98
cirazoline	Adrenergic receptor agonist	-6.94
tacrine	Acetylcholinesterase inhibitor	-6.91
siguazodan	Phosphodiesterase inhibitor	-6.53
nateglinide	Insulin secretagogue	-6.46
EBPC	Aldose reductase inhibitor	-6.27
deoxycholic-acid	G protein-coupled receptor agonist	-6.2
iproniazid	Monoamine oxidase inhibitor	-6.17
wiskostatin	Neural Wiskott-Aldrich syndrome protein inhibitor	-6.15
oligomycin-a	ATP synthase inhibitor	-6.12
ascorbyl-palmitate	antioxidant	-6.09
GSK-3-inhibitor-IX	Glycogen synthase kinase inhibitor	-6.06
ezetimibe	Niemann-Pick C1-like 1 protein antagonist	-6.04
l-stepholidine	Dopamine receptor antagonist	-6.03
topiramate	Carbonic anhydrase inhibitor	-5.94
nomifensine	Dopamine uptake inhibitor	-5.81
imatinib	BCR-ABL kinase inhibitor	-5.8
JNJ-38877605	Tyrosine kinase inhibitor	-5.78
tamoxifen	Estrogen receptor antagonist	-5.69
lamivudine	Nucleoside reverse transcriptase inhibitor	-5.64
streptozotocin	DNA alkylating agent	-5.59
teniposide	Topoisomerase inhibitor	-5.52
KUC103898N	-666	-5.42
clebopride	Dopamine receptor antagonist	-5.4
triclosan	Enoyl-[acyl-carrier-protein] reductase [NADH] inhibitor	-5.38
cefoxitin	Bacterial cell wall synthesis inhibitor	-5.33
iodoacetic-acid	Cysteine peptidase inhibitor	-5.31
teicoplanin	Bacterial cell wall synthesis inhibitor	-5.25
iobenguane	Antineoplastic	-5.18
fexofenadine	Histamine receptor antagonist	-5.18
ZK-164015	Estrogen receptor antagonist	-5.16
flurbiprofen	Cyclooxygenase inhibitor	-5.07
famotidine	Histamine receptor antagonist	-5.05
terbinafine	Fungal squalene epoxidase inhibitor	-4.95
physostigmine	Acetylcholinesterase inhibitor	-4.9
obatoclax	BCL inhibitor	-4.76
prostaglandin-b2	cAMP inhibitor	-4.73
7b-cis	Exportin antagonist	-4.69
RO-90-7501	Beta amyloid inhibitor	-4.68
CAY-10578	Casein kinase inhibitor	-4.65
piperacetazine	Dopamine receptor antagonist	-4.64
ticlopidine	Purinergic receptor antagonist	-4.64
cefuroxime	Bacterial cell wall synthesis inhibitor	-4.58
brompheniramine	Histamine receptor antagonist	-4.55
methazolamide	Carbonic anhydrase inhibitor	-4.44
formestane	Aromatase inhibitor	-4.37
sorafenib	FLT3 inhibitor	-4.29
KN-62	Calcium-calmodulin dependent protein kinase inhibitor	-4.27
irinotecan	Topoisomerase inhibitor	-4.25
ENMD-2076	FLT3 inhibitor	-4.24
FG-7142	GABA benzodiazepine site receptor inverse agonist	-4.16
oxymetholone	Androgen receptor agonist	-4.12
esmolol	Adrenergic receptor antagonist	-4.12
phenothiazine	Dopamine receptor antagonist	-4.12
PIT	Purinergic receptor antagonist	-4.09
altizide	Thiazide diuretic	-4.09
EMD-386088	Serotonin receptor agonist	-4.05
CL-218872	GABA receptor agonist	-4.03
alisertib	Aurora kinase inhibitor	-4
VU-0400195-3	Glutamate receptor modulator	-3.98
GANT-61	GLI antagonist	-3.94
flucytosine	Antifungal	-3.88
pimozide	Dopamine receptor antagonist	-3.88
VU-0404997-2	Glutamate receptor modulator	-3.87
T-0070907	PPAR receptor antagonist	-3.85
xanthinol	Vasodilator	-3.84
arachidonyl-trifluoro-methane	Cytosolic phospholipase inhibitor	-3.83
quipazine	Serotonin receptor agonist	-3.81
HG-5-113-01	Protein kinase inhibitor	-3.77
SEW-2871	Lysophospholipid receptor agonist	-3.77
o-3M3FBS	phospholipase activator	-3.77
aliskiren	Antihypertensive	-3.76
amitriptyline	Norepinephrine inhibitor	-3.74
indole	aryl hydrocarbon receptor agonist	-3.73
pazopanib	KIT inhibitor	-3.7
SCH-23390	Dopamine receptor antagonist	-3.7
nicergoline	Adrenergic receptor antagonist	-3.7
selamectin	Nematocide	-3.67
3,3'-diindolylmethane	CHK inhibitor	-3.66
terazosin	Adrenergic receptor antagonist	-3.66
PHCCC	Glutamate receptor agonist	-3.66
DAU-5884	Acetylcholine receptor antagonist	-3.61
IKK-2-inhibitor-V	IKK inhibitor	-3.56
umbelliferone	Cyclooxygenase inhibitor	-3.56
hydroxyfasudil	Rho associated kinase inhibitor	-3.56
GR-113808	Serotonin receptor antagonist	-3.52
sirolimus	MTOR inhibitor	-3.51
cytochalasin-d	Actin polymerization inhibitor	-3.49
L-690488	Inositol monophosphatase inhibitor	-3.49
etoposide	Topoisomerase inhibitor	-3.39
biochanin-a	Estrogen receptor agonist	-3.36
homoveratrylamine	Dopamine analog	-3.22
SA-792541	CDC inhibitor	-3.2
isoxsuprine	Adrenergic receptor agonist	-3.19
pseudoephedrine	Adrenergic receptor agonist	-3.08
RO-60-0175	Serotonin receptor agonist	-3.07
amisulpride	Dopamine receptor antagonist	-3.07
ciglitazone	PPAR receptor agonist	-2.95
AG-879	Angiogenesis inhibitor	-2.93
penciclovir	DNA directed DNA polymerase inhibitor	-2.92
W-12	Calmodulin antagonist	-2.9
quinethazone	Thiazide diuretic	-2.9
zolpidem	Benzodiazepine receptor agonist	-2.89
pyrvinium-pamoate	AKT inhibitor	-2.85
tracazolate	GABA receptor modulator	-2.85
ergocornine	Dopamine receptor agonist	-2.85
purmorphamine	Smoothened receptor agonist	-2.8
icilin	TRPV agonist	-2.8
asiatic-acid	Apoptosis stimulant	-2.79
tetradecylthioacetic-acid	Lipid peroxidase inhibitor	-2.78
aniracetam	Glutamate receptor agonist	-2.78
enobosarm	Androgen receptor modulator	-2.75
oxyphenonium	Cholinergic receptor antagonist	-2.71
6-aminochrysene	Transferase inhibitor	-2.7
SDZ-NKT-343	Tachykinin antagonist	-2.68
argatroban	Thrombin inhibitor	-2.64
phenformin	AMPK activator	-2.61
chlortetracycline	Protein synthesis inhibitor	-2.61
razoxane	Chelating agent	-2.54
ICI-199441	Opioid receptor agonist	-2.54
vecuronium	Acetylcholine receptor antagonist	-2.5
hyperoside	Glucosidase inhibitor	-2.5
niguldipine	Calcium channel blocker	-2.5
BAX-channel-blocker	Cytochrome C release inhibitor	-2.49
CGP-55845	GABA receptor antagonist	-2.47
withaferin-a	IKK inhibitor	-2.46
BCI-hydrochloride	Protein phosphatase inhibitor	-2.43
BP-554	Serotonin receptor agonist	-2.43
darinaparsin	Apoptosis stimulant	-2.43
LY-2183240	FAAH inhibitor	-2.4
BMY-7378	Adrenergic receptor antagonist	-2.36
dolasetron	Serotonin receptor antagonist	-2.33
W-5	Calmodulin antagonist	-2.33
buphenine	Adrenergic receptor agonist	-2.3
rufloxacin	Bacterial DNA gyrase inhibitor	-2.29
clomifene	Estrogen receptor antagonist	-2.29
salsolinol	Monoamine oxidase inhibitor	-2.27
arvanil	TRPV agonist	-2.26
linsitinib	IGF-1 inhibitor	-2.26
droperidol	Dopamine receptor antagonist	-2.24
alosetron	Serotonin receptor antagonist	-2.22
ergocryptine	Dopamine agonist	-2.22
clemastine	Histamine receptor antagonist	-2.22
gliquidone	Sulfonylurea	-2.22
vincristine	Tubulin inhibitor	-2.19
mocimycin	Protein synthesis inhibitor	-2.18
sulconazole	Sterol demethylase inhibitor	-2.18
RG-14620	EGFR inhibitor	-2.18
naringenin	Aromatase inhibitor	-2.18
RX-821002	Adrenergic receptor antagonist	-2.17
ifenprodil	Adrenergic receptor antagonist	-2.15
disulfiram	Aldehyde dehydrogenase inhibitor	-2.11
phenylbutazone	Cyclooxygenase inhibitor	-2.11
biperiden	Acetylcholine receptor antagonist	-2.11
metergoline	Dopamine receptor agonist	-2.11
naftopidil	Adrenergic receptor antagonist	-2.08
indirubin	CDK inhibitor	-2.08
amoxicillin	Penicillin binding protein inhibitor	-2.08
procainamide	Sodium channel blocker	-2.08
tyrphostin-A9	Protein tyrosine kinase inhibitor	-2.08
terfenadine	Histamine receptor antagonist	-2.05
WYE-125132	MTOR inhibitor	-2.04
BRL-37344	Adrenergic receptor agonist	-2.01
cinacalcet	Calcium channel activator	-1.97
JNJ-26854165	HDAC inhibitor	-1.97
SN-38	Topoisomerase inhibitor	-1.97
PD-123319	Angiotensin receptor antagonist	-1.94
GS-39783	GABA receptor modulator	-1.94
glycodeoxycholic-acid	Apoptosis stimulant	-1.94
metaxalone	Muscle relaxant	-1.9
aminogenistein	SRC inhibitor	-1.9
phorbol-12-myristate-13-acetate	PKC activator	-1.87
vinblastine	Microtubule inhibitor	-1.87
T-98475	Gonadotropin releasing factor hormone receptor antagonist	-1.87
PNU-96415E	Dopamine receptor antagonist	-1.87
mercaptopurine	Immunosuppressant	-1.87
GW-501516	PPAR receptor agonist	-1.86
budesonide	Glucocorticoid receptor agonist	-1.85
nimetazepam	GABA receptor agonist	-1.82
lylamine	Cannabinoid receptor agonist	-1.8
sulmazole	Adenosine receptor antagonist	-1.8
gamma-linolenic-acid	Cyclooxygenase inhibitor	-1.8
brinzolamide	Carbonic anhydrase inhibitor	-1.8
cladribine	Adenosine deaminase inhibitor	-1.8
estriol	Estrogen receptor agonist	-1.8
SU-1498	VEGFR inhibitor	-1.76
bupropion	Dopamine uptake inhibitor	-1.76
esomeprazole	ATPase inhibitor	-1.71
denbufylline	Phosphodiesterase inhibitor	-1.69
NPI-2358	Tubulin inhibitor	-1.66
xaliproden	Serotonin receptor agonist	-1.66
bis-tyrphostin	EGFR inhibitor	-1.66
bosentan	Endothelin receptor antagonist	-1.65
UK-356618	Metalloproteinase inhibitor	-1.64
SQ-22536	Adenylyl cyclase inhibitor	-1.62
cinchonine	P-glycoprotein inhibitor	-1.62
sulfafurazole	Bacterial antifolate	-1.62
thiostrepton	FOXM1 inhibitor	-1.59
NBI-27914	CRF receptor antagonist	-1.59
levcromakalim	Potassium channel activator	-1.55
bosutinib	ABL inhibitor	-1.52
O-1918	Cannabinoid receptor antagonist	-1.52
butabindide	Tripeptidyl peptidase inhibitor	-1.52
benperidol	Dopamine receptor antagonist	-1.52
troglitazone	Insulin sensitizer	-1.51
KI-16425	Lysophosphatidic acid receptor antagonist	-1.48
benzbromarone	Chloride channel blocker	-1.48
formoterol	Adrenergic receptor agonist	-1.48
alimemazine	Histamine receptor agonist	-1.48
mebendazole	Tubulin inhibitor	-1.48
rimexolone	Glucocorticoid receptor agonist	-1.44
FR-139317	Endothelin receptor antagonist	-1.44
dihydroergocristine	Adrenergic receptor antagonist	-1.42
LE-135	Retinoid receptor agonist	-1.42
nifurtimox	DNA inhibitor	-1.41
L-745870	Dopamine receptor antagonist	-1.41
maprotiline	Norepinephrine reuptake inhibitor	-1.41
PIK-90	PI3K inhibitor	-1.37
zileuton	Leukotriene inhibitor	-1.37
nefopam	Cyclooxygenase inhibitor	-1.37
austricine	Hypolipidemic	-1.36
andarine	Androgen receptor modulator	-1.34
H-89	PKA inhibitor	-1.34
ipratropium	Acetylcholine receptor antagonist	-1.34
losartan	Angiotensin receptor antagonist	-1.34
dictamnine	Furoquinoline alkaloid	-1.32
tyrphostin-51	EGFR inhibitor	-1.31
CCCP	Mitochondrial oxidative phosphorylation uncoupler	-1.31
GW-583340	EGFR inhibitor	-1.3
dichlorobenzamil	Sodium/calcium exchange inhibitor	-1.3
etomidate	GABA receptor modulator	-1.3
quercetagetin	PIM inhibitor	-1.27
AM-630	Cannabinoid receptor antagonist	-1.27
scandenin	Plant compound with antimicrobial activity	-1.25
itopride	Dopamine receptor antagonist	-1.23
CHEMBL-374350	NFkB pathway inhibitor	-1.23
trimethobenzamide	Histamine receptor antagonist	-1.23
lawsone	Coloring agent	-1.23
isoreserpine	Vesicular monoamine transporter inhibitor	-1.23
reversine	Aurora kinase inhibitor	-1.2
diphenyleneiodonium	Nitric oxide synthase inhibitor	-1.2
GW-4064	FXR agonist	-1.2
ephedrine	Adrenergic receptor agonist	-1.2
depudecin	HDAC inhibitor	-1.2
danusertib	Aurora kinase inhibitor	-1.2
tangeritin	Cell cycle inhibitor	-1.17
BRD-K34437622	Thymidylate synthase inhibitor	-1.16
RHC-80267	Triacylglycerol lipase inhibitor	-1.16
pifithrin	Interleukin receptor antagonist	-1.16
icosapent	Platelet aggregation inhibitor	-1.16
oxybuprocaine	Local anesthetic	-1.15
BI-78D3	JNK inhibitor	-1.13
CGS-21680	Adenosine receptor agonist	-1.13
dovitinib	EGFR inhibitor	-1.09
IWR-1-ENDO	PARP inhibitor	-1.09
SIB-1757	Glutamate receptor antagonist	-1.09
SDZ-205-557	Serotonin receptor antagonist	-1.09
hippeastrine	Plant alkaloid	-1.09
homosalate	HSP inducer	-1.09
GR-127935	Serotonin receptor antagonist	-1.09
DY-131	Estrogen receptor agonist	-1.06
fluvastatin	HMGCR inhibitor	-1.06
tretinoin	Retinoid receptor agonist	-1.06
dactolisib	MTOR inhibitor	-1.05
tipifarnib	Farnesyltransferase inhibitor	-1.02
diethyltoluamide	DEET activator of fly antenna ionotropic receptor IR40a	-1.02
rofecoxib	Cyclooxygenase inhibitor	-1.02
flunarizine	Calcium channel blocker	-1.02
meropenem	Bacterial cell wall synthesis inhibitor	-1.02
pantoprazole	ATPase inhibitor	-1.01
erlotinib	EGFR inhibitor	-0.99
tripelennamine	Histamine receptor antagonist	-0.99
pirfenidone	TGF beta receptor inhibitor	-0.99
entinostat	HDAC inhibitor	-0.99
paxilline	Potassium channel blocker	-0.96
loteprednol	Glucocorticoid receptor agonist	-0.95
diphencyprone	Immunostimulant	-0.95
PD-102807	Acetylcholine receptor antagonist	-0.95
ML-7	Myosin light chain kinase inhibitor	-0.92
fluorometholone	Glucocorticoid receptor agonist	-0.91
Ro-04-6790	Serotonin receptor antagonist	-0.88
hymecromone	Monoamine oxidase inhibitor	-0.88
AM-251	Cannabinoid receptor antagonist	-0.88
kinetin-riboside	Apoptosis stimulant	-0.88
CP-724714	EGFR inhibitor	-0.85
KU-C103871	GSP agonist	-0.85
penfluridol	T-type calcium channel blocker	-0.85
chlorprothixene	Dopamine receptor antagonist	-0.85
iocetamic-acid	Radiopaque medium	-0.85
racecadotril	Enkephalinase inhibitor	-0.85
cerivastatin	HMGCR inhibitor	-0.81
NNC-63-0532	Opioid receptor agonist	-0.81
RHO-kinase-inhibitor-II	Rho associated kinase inhibitor	-0.81
LY-294002	MTOR inhibitor	-0.81
PAC-1	Caspase activator	-0.81
SU-4312	PDGFR receptor inhibitor	-0.78
spiperone	Dopamine receptor antagonist	-0.78
cyanopindolol	Adrenergic receptor antagonist	-0.78
tegaserod	Serotonin receptor partial agonist	-0.74
olaparib	PARP inhibitor	-0.74
syrosingopine	Vesicular monoamine transporter inhibitor	-0.74
clomethiazole	GABA receptor antagonist	-0.74
bromocriptine	Dopamine receptor agonist	-0.74
emodic-acid	Laxative	-0.74
ICI-204448	Opioid receptor agonist	-0.74
osthol	Calcium channel blocker	-0.72
methylene-blue	Guanylyl cyclase inhibitor	-0.7
seneciphylline	Cytochrome P450 inhibitor	-0.7
SB-431542	TGF beta receptor inhibitor	-0.7
RS-67333	Serotonin receptor partial agonist	-0.7
O-2050	Cannabinoid receptor antagonist	-0.7
tosyllysyl-chloromethyl-ketone	Chymotrypsin inhibitor	-0.7
mammea-a	other antibiotic	-0.7
PSB-069	NTPDase inhibitor	-0.7
digoxin	ATPase inhibitor	-0.7
myriocin	Serine palmitoyltransferase inhibitor	-0.67
TCB2	Serotonin receptor agonist	-0.67
fluprostenol	Prostanoid receptor agonist	-0.67
CFM-1571	Guanylate cyclase activator	-0.67
milrinone	Phosphodiesterase inhibitor	-0.67
phloretin	Sodium/glucose cotransporter inhibitor	-0.67
tyrphostin-47	EGFR inhibitor	-0.66
levocetirizine	Histamine receptor antagonist	-0.63
L-750667	Dopamine receptor antagonist	-0.63
GTP-14564	FLT3 inhibitor	-0.63
riboflavin	Vitamin B	-0.63
ambroxol	Sodium channel blocker	-0.63
flupentixol	Dopamine receptor antagonist	-0.6
noreleagnine	Monoamine oxidase inhibitor	-0.6
nefazodone	Adrenergic inhibitor	-0.56
MT-21	Caspase activator	-0.56
GR-103691	Dopamine receptor antagonist	-0.56
deguelin	NADH-ubiquinone oxidoreductase (Complex I) inhibitor	-0.55
propentofylline	Adenosine reuptake inhibitor	-0.54
RO-25-6981	Ionotropic glutamate receptor antagonist	-0.53
raltitrexed	Thymidylate synthase inhibitor	-0.53
PG-9	Acetylcholine receptor agonist	-0.49
J-104129	Acetylcholine receptor antagonist	-0.49
hexylcaine	Sodium channel blocker	-0.49
oxfendazole	Anthelmintic	-0.49
ilomastat	Matrix metalloprotease inhibitor	-0.47
orlistat	Lipase inhibitor	-0.46
EMF-bca1-60	caspase inhibitor	-0.46
testosterone	androgen receptor agonist	-0.46
SDZ-WAG-994	Adenosine receptor agonist	-0.46
L-693403	Sigma receptor agonist	-0.46
BAPTA-AM	Potassium channel blocker	-0.46
pirlindole	Monoamine oxidase inhibitor	-0.46
oxibendazole	Tubulin inhibitor	-0.46
tyrphostin-AG-527	Protein tyrosine kinase inhibitor	-0.46
rutin	Antioxidant	-0.46
carpindolol	Adrenergic receptor antagonist	-0.45
NS-1619	Calcium channel activator	-0.44
perhexiline	Carnitine palmitoyltransferase inhibitor	-0.42
SR-57227A	Serotonin receptor agonist	-0.42
sappanone-a	Tyrosinase inhibitor	-0.42
PSB-06126	NTPDase inhibitor	-0.42
MDL-29951	Glutamate receptor antagonist	-0.42
dorsomorphin	AMPK inhibitor	-0.42
gatifloxacin	Bacterial DNA gyrase inhibitor	-0.42
fludarabine	DNA synthesis inhibitor	-0.42
RO-28-1675	Glucokinase activator	-0.42
molindone	Dopamine receptor antagonist	-0.42
lansoprazole	ATPase inhibitor	-0.41
orciprenaline	Adrenergic receptor agonist	-0.41
SB-225002	CC chemokine receptor antagonist	-0.39
SA-1478088	-666	-0.39
NVP-TAE684	ALK inhibitor	-0.39
nialamide	Monoamine oxidase inhibitor	-0.39
avrainvillamide-analog-4	nucleophosmin inhibitor	-0.35
lumicolchicine	Colchicine isomer, non-binder of microtubules	-0.35
proscillaridin	ATPase inhibitor	-0.35
estradiol	Contraceptive agent	-0.35
clioquinol	Chelating agent	-0.35
fenbufen	Cyclooxygenase inhibitor	-0.35
SDM25N	Opioid receptor antagonist	-0.35
nifekalant	Potassium channel blocker	-0.32
LDN-193189	Serine/threonine kinase inhibitor	-0.32
cytosporone-b	NUR77 receptor agonist	-0.32
papaverine	Phosphodiesterase inhibitor	-0.32
lidoflazine	Calcium channel blocker	-0.32
JAK3-inhibitor-V	JAK inhibitor	-0.32
podophyllotoxin	Microtubule inhibitor	-0.32
clozapine	Dopamine receptor antagonist	-0.32
venlafaxine	Adrenergic inhibitor	-0.32
baeomycesic-acid	Lipoxygenase inhibitor	-0.29
nilotinib	ABL inhibitor	-0.28
sulfasalazine	Antirheumatic	-0.28
epigallocatechin	Nitric oxide synthase inhibitor	-0.28
JLK-6	Gamma secretase inhibitor	-0.28
benzyl-quinazolin-4-yl-amine	EGFR inhibitor	-0.28
tolazoline	Adrenergic receptor antagonist	-0.28
ABT-737	BCL inhibitor	-0.27
ruxolitinib	JAK inhibitor	-0.26
kitasamycin	Protein synthesis inhibitor	-0.25
saquinavir	HIV protease inhibitor	-0.25
pyrazolanthrone	JNK inhibitor	-0.25
XE-991	Potassium channel blocker	-0.25
guanabenz	Adrenergic receptor agonist	-0.25
dihydrosamidin	Phospholipase inhibitor	-0.25
triamterene	Sodium channel blocker	-0.25
tomelukast	Leukotriene receptor antagonist	-0.21
cilostazol	Phosphodiesterase inhibitor	-0.21
diphenidol	Acetylcholine receptor agonist	-0.21
tubaic-acid	Mitochondrial complex I inhibitor	-0.18
mevastatin	HMGCR inhibitor	-0.18
r(-)-propylnorapomorphine	Dopamine receptor agonist	-0.18
MRS-1334	Adenosine receptor antagonist	-0.18
cisapride	Serotonin receptor agonist	-0.18
tocainide	Sodium channel blocker	-0.18
fluphenazine	Dopamine receptor antagonist	-0.18
ZSTK-474	PI3K inhibitor	-0.15
crizotinib	ALK inhibitor	-0.14
methandriol	Androgenic steroid	-0.14
nafcillin	Bacterial cell wall synthesis inhibitor	-0.14
wortmannin	PI3K inhibitor	-0.14
indirubin	CDK inhibitor	-0.14
iopanoic-acid	Radiopaque medium	-0.14
valdecoxib	Cyclooxygenase inhibitor	-0.14
motesanib	KIT inhibitor	-0.11
itraconazole	Cytochrome P450 inhibitor	-0.11
bendroflumethiazide	Sodium/potassium/chloride transporter inhibitor	-0.11
ramipril	ACE inhibitor	-0.11
PD-0325901	MEK inhibitor	-0.11
resveratrol	Cytochrome P450 inhibitor	-0.11
etamivan	Respiratory stimulant	-0.08
levetiracetam	Calcium channel blocker	-0.07
glimepiride	Insulin secretagogue	-0.07
tyrphostin-AG-494	EGFR inhibitor	-0.07
fluoxetine	Selective serotonin reuptake inhibitor (SSRI)	-0.07
trifluoperazine	Dopamine receptor antagonist	-0.07
trimipramine	Norepinephrine reuptake inhibitor	-0.07
carvedilol	Adrenergic receptor antagonist	-0.04
chlorpromazine	Dopamine receptor antagonist	-0.04
HTMT	Histamine receptor agonist	-0.04
barasertib	Aurora kinase inhibitor	-0.03
alitretinoin	Retinoid receptor agonist	-0.03
M-3M3FBS	phospholipase activator	-0.03
altanserin	Serotonin receptor antagonist	-0.03
arcyriaflavin-a	CDK inhibitor	-0.03
loperamide	Opioid receptor agonist	-0.03
brimonidine	Adrenergic receptor agonist	-0.03
gemcitabine	Ribonucleotide reductase inhibitor	-0.03
FGIN-1-27	Inositol monophosphatase inhibitor	-0.03
WZ-4002	EGFR inhibitor	-0.02
dextromethorphan	Glutamate receptor antagonist	-0.02
piperlongumine	Glutathione transferase inhibitor	-0.02
prazosin	Adrenergic receptor antagonist	-0.02
bepridil	Calcium channel blocker	-0.02
azathioprine	Dehydrogenase inhibitor	-0.02
primidone	GABA receptor antagonist	-0.02
phenoxybenzamine	Adrenergic receptor antagonist	-0.02
amiodarone	Potassium channel blocker	-0.01

## Sheet: Sheet 7
Drugs with negative CMap connectivity to the all-tissue GTEx signature
compound_name	compound_description	connectivity_score
indinavir	HIV protease inhibitor	-94.02
isogedunin	HSP inhibitor	-80.08
deforolimus	MTOR inhibitor	-75.98
phorbol-12-myristate-13-acetate	PKC activator	-72.7
U-46619	Thromboxane receptor agonist	-70.54
BX-795	IKK inhibitor	-70.08
aspirin	Cyclooxygenase inhibitor	-69.96
pirinixic-acid	PPAR receptor agonist	-69.16
ON-01910	PLK inhibitor	-68.57
praziquantel	Anthelmintic	-65.7
naltrexone	Opioid receptor antagonist	-62.47
prostratin	PKC activator	-62.16
HNHA	HDAC inhibitor	-61.44
benzyl-quinazolin-4-yl-amine	EGFR inhibitor	-58.47
QS-11	ARFGAP inhibitor	-57.21
ingenol	PKC activator	-57.18
nateglinide	Insulin secretagogue	-56.97
cefalexin	Bacterial cell wall synthesis inhibitor	-53.77
nifurtimox	DNA inhibitor	-53.4
heraclenol	Vitamin K antagonist	-52.88
niguldipine	Calcium channel blocker	-51.28
W-12	Calmodulin antagonist	-50.93
BMS-182874	Endothelin receptor antagonist	-47.95
CGK-733	ATR kinase inhibitor	-47.33
erismodegib	Smoothened receptor antagonist	-46.49
temsirolimus	MTOR inhibitor	-45.99
propoxycaine	Local anesthetic	-45.52
lupanine	Sodium channel blocker	-45.08
U-99194	Dopamine receptor antagonist	-44.99
TER-14687	Inhibitor of translocation of PKCq in T cells	-44.99
prostaglandin-e1	Prostanoid receptor agonist	-44.17
BRL-54443	Serotonin receptor agonist	-42.6
CAY-10618	NAMPT inhibitor	-41.93
androstanol	CAR antagonist	-41.92
pseudoephedrine	Adrenergic receptor agonist	-41.88
N6-cyclopentyladenosine	Adenosine receptor agonist	-41.14
SU-1498	VEGFR inhibitor	-40.94
lasalocid	Bacterial permeability inducer	-40.55
methotrexate	Dihydrofolate reductase inhibitor	-38.19
homatropine	Acetylcholine receptor antagonist	-37.49
TW-37	BCL inhibitor	-33.61
SRC-kinase-inhibitor-I	SRC inhibitor	-32.52
LFM-A12	EGFR inhibitor	-32.35
metrizamide	Radiopaque medium	-32.14
tretinoin	Retinoid receptor agonist	-31.94
tandutinib	FLT3 inhibitor	-30.89
hydrastine	Tyrosine hydroxylase inhibitor	-29.36
rosuvastatin	HMGCR inhibitor	-29.35
butein	EGFR inhibitor	-29.23
dexketoprofen	Cyclooxygenase inhibitor	-28.68
oxiconazole	Bacterial cell wall synthesis inhibitor	-28.2
GBR-13069	Dopamine uptake inhibitor	-28.1
arvanil	TRPV agonist	-27.53
ciglitazone	PPAR receptor agonist	-27.34
mocimycin	Protein synthesis inhibitor	-27.26
ZK-164015	Estrogen receptor antagonist	-27.25
CDC	Lipoxygenase inhibitor	-27.25
rhodomyrtoxin-b	sodium fluorescein uptake inhibitor	-27.12
10H-phenothiazin-10-yl)(p-tolyl)methanone	Butyrylcholinesterase inhibitor	-26.96
indirubin	CDK inhibitor	-26.67
prunetin	Breast cancer resistance protein inhibitor	-26.64
mofezolac	Cyclooxygenase inhibitor	-26.29
fluticasone	Glucocorticoid receptor agonist	-26.19
I-OMe-AG-538	IGF-1 inhibitor	-26.07
lacidipine	Calcium channel blocker	-26.04
arctigenin	MEK inhibitor	-25.81
heliomycin	ATP synthase inhibitor	-25.68
argatroban	Thrombin inhibitor	-25.66
dihydro-7-desacetyldeoxygedunin	HSP inhibitor	-25.66
bosentan	Endothelin receptor antagonist	-25.39
BRD-K34608650	Cannabinoid receptor agonist	-25.13
ZK-93423	Benzodiazepine receptor agonist	-25.04
hydroxyfasudil	Rho associated kinase inhibitor	-24.91
T-98475	Gonadotropin releasing factor hormone receptor antagonist	-24.35
JNJ-10191584	Histamine receptor antagonist	-24.26
L-BSO	Glutathione transferase inhibitor	-23.79
meclocycline	Bacterial 30S ribosomal subunit inhibitor	-23.57
articaine	Local anesthetic	-23.29
SA-63133	-666	-23.24
thioperamide	Histamine receptor antagonist	-22.98
CP-94253	Serotonin receptor agonist	-22.94
calycanthine	GABA release inhibitor	-22.68
MBCQ	Phosphodiesterase inhibitor	-22.48
mupirocin	Isoleucyl-tRNA synthetase inhibitor	-22.43
butylparaben	DNA synthesis inhibitor	-22.15
PAC-1	Caspase activator	-22.1
CAY-10578	Casein kinase inhibitor	-21.94
calmidazolium	Calcium channel blocker	-21.76
tyrphostin-47	EGFR inhibitor	-21.54
L-692585	Growth hormone releasing peptide ligand agonist	-20.96
GR-103691	Dopamine receptor antagonist	-20.54
daphnetin	Protein kinase inhibitor	-20.1
ICI-199441	Opioid receptor agonist	-19.74
isradipine	Calcium channel blocker	-19.73
gamma-homolinolenic-acid	Cholesterol inhibitor	-19.64
WR-216174	PFMRK inhibitor	-18.79
ergocornine	Dopamine receptor agonist	-18.7
clofazimine	GK0582 inhibitor	-18.69
HU-211	Glutamate receptor antagonist	-18.64
spiroxatrine	Serotonin receptor antagonist	-18.58
5'-guanidinonaltrindole	Opioid receptor antagonist	-18.55
bicuculline	GABA receptor antagonist	-18.49
RG-14620	EGFR inhibitor	-18.45
thapsigargin	ATPase inhibitor	-18.34
16,16-dimethylprostaglandin-e2	Prostanoid receptor agonist	-18.22
iso-olomoucine	CDK inhibitor	-18.09
norethisterone	Progesterone receptor agonist	-18.06
Cyclo-[Arg-Gly-Asp-D-Phe-Val]	integrin antagonist	-18
diclofenamide	Carbonic anhydrase inhibitor	-17.51
benzanthrone	Aromatic hydrocarbon derivative	-17.42
nicergoline	Adrenergic receptor antagonist	-17.35
fexofenadine	Histamine receptor antagonist	-17.33
U-0124	MEK inhibitor	-17.07
VUF-5681	Histamine receptor antagonist	-16.63
diethylcarbamazine	Lipoxygenase inhibitor	-16.54
BRL-50481	Phosphodiesterase inhibitor	-16.24
l-stepholidine	Dopamine receptor antagonist	-16.07
vitexin	Antioxidant	-16.02
PSB-06126	NTPDase inhibitor	-15.87
tyrphostin-A9	Protein tyrosine kinase inhibitor	-15.42
relcovaptan	Vasopressin receptor antagonist	-15.35
diazepam	Benzodiazepine receptor agonist	-15.29
niclosamide	DNA replication inhibitor	-15.22
SC-560	Cyclooxygenase inhibitor	-15.01
rhodomyrtoxin	Cytotoxic agent	-14.87
fipronil	GABA gated chloride channel blocker	-14.82
BMS-299897	Gamma secretase inhibitor	-14.81
EMD-386088	Serotonin receptor agonist	-14.53
tropanyl-3,5-dimethylbenzoate	Serotonin receptor antagonist	-14.46
megestrol	Progesterone receptor agonist	-14.44
clofibrate	PPAR receptor agonist	-13.98
diprotin-a	Dipeptidyl peptidase inhibitor	-13.88
6-aminochrysene	Transferase inhibitor	-13.71
CGP-71683	Neuropeptide receptor antagonist	-13.5
hyperoside	Glucosidase inhibitor	-13.3
sappanone-a	Tyrosinase inhibitor	-12.77
ivermectin	GABA receptor agonist	-12.56
GANT-58	GLI antagonist	-12.52
primaquine	Antimalarial	-12.17
flavanone	11-beta-HSD1 inhibitor	-12.17
TCS-359	FLT3 inhibitor	-12.14
SR-59230A	Adrenergic receptor antagonist	-11.97
hexylresorcinol	Local anesthetic	-11.67
arcyriaflavin-a	CDK inhibitor	-11.57
ethylestrenol	Progesterone receptor agonist	-11.41
entacapone	Catechol O methyltransferase inhibitor	-11.13
asiatic-acid	Apoptosis stimulant	-11.12
heliotrine	Pyrrolizidine alkaloid	-10.96
bulleyaconitine-a	Non-opiod analgesic	-10.91
homosalate	HSP inducer	-10.89
valproic-acid	HDAC inhibitor	-10.84
CD-437	Retinoid receptor agonist	-10.82
SA-1478088	-666	-10.8
L-701324	Glutamate receptor antagonist	-10.65
leu-enkephalin	Opioid receptor agonist	-10.43
5-methoxytryptamine	Serotonin receptor agonist	-10.17
NPC-15199	ICAM1 antagonist	-9.8
tosyl-phenylalanyl-chloromethyl-ketone	Chymotrypsin inhibitor	-9.79
etomoxir	Carnitine palmitoyltransferase inhibitor	-9.62
PTB1	AMPK activator	-9.59
JNK-9L	JNK inhibitor	-9.51
cyclosporin-a	Calcineurin inhibitor	-9.39
LM-1685	Cyclooxygenase inhibitor	-9.19
amcinonide	Glucocorticoid receptor agonist	-9.19
proscillaridin	ATPase inhibitor	-9.08
valsartan	Angiotensin receptor antagonist	-9.06
FG-7142	GABA benzodiazepine site receptor inverse agonist	-9.06
cytosporone-b	NUR77 receptor agonist	-9.01
orciprenaline	Adrenergic receptor agonist	-8.73
pentobarbital	Barbiturate antiepileptic	-8.7
levofloxacin	Bacterial DNA gyrase inhibitor	-8.66
U-18666A	Oxidosqualene cyclase inhibitor	-8.64
BML-190	Cannabinoid receptor inverse agonist	-8.49
digitoxigenin	ATPase inhibitor	-8.22
karakoline	Phytotoxin	-8.11
terfenadine	Histamine receptor antagonist	-8.07
loteprednol	Glucocorticoid receptor agonist	-8
naringenin	Aromatase inhibitor	-7.98
sinensetin	Cyclooxygenase inhibitor	-7.91
tipifarnib	Farnesyltransferase inhibitor	-7.7
sirolimus	MTOR inhibitor	-7.64
bufalin	ATPase inhibitor	-7.62
fluorometholone	Glucocorticoid receptor agonist	-7.54
saclofen	GABA receptor antagonist	-7.53
CCCP	Mitochondrial oxidative phosphorylation uncoupler	-7.5
PSB-36	Adenosine receptor antagonist	-7.49
losartan	Angiotensin receptor antagonist	-7.3
nTZDpa	PPAR receptor agonist	-7.23
tiagabine	GABA uptake inhibitor	-7.22
diltiazem	Calcium channel blocker	-7.19
selamectin	Nematocide	-7.14
TAK-715	p38 MAPK inhibitor	-7.12
amylocaine	Local anesthetic	-7.1
trimetozine	Sedative	-7.08
clomethiazole	GABA receptor antagonist	-7.05
hydroxycholesterol	LXR agonist	-6.91
L-689560	Glutamate receptor antagonist	-6.91
asiaticoside	Antineoplastic	-6.85
altizide	Thiazide diuretic	-6.83
acetyl-farnesyl-cysteine	Inhibitor of methylation of endogenous isoprenylated proteins	-6.69
ascorbic-acid	Antioxidant	-6.64
GR-55562	Serotonin receptor antagonist	-6.63
metergoline	Dopamine receptor agonist	-6.6
zolpidem	Benzodiazepine receptor agonist	-6.55
UNC-0321	Histone lysine methyltransferase inhibitor	-6.55
obatoclax	BCL inhibitor	-6.51
nor-binaltorphimine	Opioid receptor antagonist	-6.46
topiramate	Carbonic anhydrase inhibitor	-6.34
fluvastatin	HMGCR inhibitor	-6.19
cytochalasin-b	Microtubule inhibitor	-6.14
doxylamine	Histamine receptor antagonist	-6.13
levonorgestrel	Estrogen receptor agonist	-6.1
exemestane	Aromatase inhibitor	-6.01
L-741626	Dopamine receptor antagonist	-6
L-655708	GABA receptor inverse agonist	-5.98
methazolamide	Carbonic anhydrase inhibitor	-5.87
caffeic-acid	Lipoxygenase inhibitor	-5.72
lypressin	Vasopressin receptor agonist	-5.5
benzbromarone	Chloride channel blocker	-5.5
pravastatin	HMGCR inhibitor	-5.45
cefpodoxime	Bacterial cell wall synthesis inhibitor	-5.32
phenolphthalein	Indicator dye	-5.32
raclopride	Dopamine receptor antagonist	-5.3
antimycin-a	ATP synthase inhibitor	-5.25
homochlorcyclizine	Antihistamine	-5.24
resveratrol	Cytochrome P450 inhibitor	-5.22
L-152804	Neuropeptide receptor antagonist	-5.14
RO-3306	CDK inhibitor	-5.14
guanfacine	Adrenergic receptor agonist	-5.04
niridazole	Phosphofructokinase inhibitor	-4.99
prometon	Photosynthesis inhibitor	-4.94
BW-B70C	Lipoxygenase inhibitor	-4.93
quipazine	Serotonin receptor agonist	-4.79
spiramide	Dopamine receptor antagonist	-4.74
teicoplanin	Bacterial cell wall synthesis inhibitor	-4.72
BAY-K8644	Calcium channel activator	-4.61
pazopanib	KIT inhibitor	-4.55
diclofenac	Cyclooxygenase inhibitor	-4.55
acetyl-geranygeranyl-cysteine	Inhibitor of methyl esterification of geranylgeranylated proteins	-4.47
orantinib	FGFR inhibitor	-4.44
raltegravir	HIV integrase inhibitor	-4.44
VX-222	HCV inhibitor	-4.37
tenovins	SIRT inhibitor	-4.37
HG-5-113-01	Protein kinase inhibitor	-4.37
paclitaxel	Tubulin inhibitor	-4.35
TCPOBOP	CAR agonist	-4.33
ML-7	Myosin light chain kinase inhibitor	-4.27
cilostazol	Phosphodiesterase inhibitor	-4.27
atovaquone	Mitochondrial electron transport inhibitor	-4.26
androstenol	GABA receptor modulator	-4.23
fludrocortisone	Glucocorticoid receptor agonist	-4.21
mirin	MRE11A exonuclease inhibitor	-4.19
YK-4279	Apoptosis stimulant	-4.16
ALX-5407	Glycine transporter inhibitor	-4.12
MRS-1845	Calcium channel blocker	-4.09
SB-216641	Serotonin receptor antagonist	-4.09
epothilone-a	Microtubule stabilizing agent	-4.05
LY-288513	CCK receptor antagonist	-4.02
flavoxate	Acetylcholine receptor antagonist	-4.02
tubacin	HDAC inhibitor	-4.02
minoxidil	KATP activator	-4
formestane	Aromatase inhibitor	-3.98
benzohydroxamic-acid	Antifungal	-3.97
tofacitinib	JAK inhibitor	-3.88
isotretinoin	Retinoid receptor agonist	-3.79
lamivudine	Nucleoside reverse transcriptase inhibitor	-3.77
3,3'-diindolylmethane	CHK inhibitor	-3.74
solanine	Acetylcholinesterase inhibitor	-3.74
iocetamic-acid	Radiopaque medium	-3.66
KU-C103871	GSP agonist	-3.59
parthenolide	NFkB pathway inhibitor	-3.52
bis-tyrphostin	EGFR inhibitor	-3.52
acepromazine	Dopamine receptor antagonist	-3.49
BMY-14802	Sigma receptor antagonist	-3.49
voriconazole	Cytochrome P450 inhibitor	-3.45
acitretin	Retinoid receptor agonist	-3.45
imatinib	BCR-ABL kinase inhibitor	-3.45
atracurium	Acetylcholine receptor antagonist	-3.42
hymecromone	Monoamine oxidase inhibitor	-3.42
GSK-3-inhibitor-IX	Glycogen synthase kinase inhibitor	-3.28
dibenzoylmethane	Antineoplastic	-3.24
racecadotril	Enkephalinase inhibitor	-3.24
nikkomycin	Chitin inhibitor	-3.14
zileuton	Leukotriene inhibitor	-3.09
tiotidine	Histamine receptor antagonist	-3.09
tamoxifen	Estrogen receptor antagonist	-3.05
BRD-K66782112	Histamine receptor antagonist	-3.03
DPO-1	Potassium channel blocker	-3.03
ipriflavone	Bone resorption inhibitor	-3.02
VX-745	p38 MAPK inhibitor	-2.97
fenretinide	Apoptosis stimulant	-2.96
glycodeoxycholic-acid	Apoptosis stimulant	-2.96
parthenolide	NFkB pathway inhibitor	-2.92
NU-7441	DNA dependent protein kinase inhibitor	-2.89
itopride	Dopamine receptor antagonist	-2.86
purmorphamine	Smoothened receptor agonist	-2.85
quinpirole	Dopamine receptor agonist	-2.85
propantheline	Acetylcholine receptor antagonist	-2.85
BMS-345541	IKK inhibitor	-2.82
NS-1619	Calcium channel activator	-2.82
moracizine	Sodium channel blocker	-2.82
vindesine	Tubulin inhibitor	-2.76
SAL-1	Adenosine receptor antagonist	-2.76
oxymetholone	Androgen receptor agonist	-2.74
NTNCB	Neuropeptide receptor antagonist	-2.74
iloperidone	Dopamine receptor antagonist	-2.71
zaprinast	Phosphodiesterase inhibitor	-2.71
penciclovir	DNA directed DNA polymerase inhibitor	-2.68
alimemazine	Histamine receptor agonist	-2.68
WZ-4-145	EGFR inhibitor	-2.67
BRD-K41143549	Glutamate receptor antagonist	-2.66
bongkrek-acid	Mitochondrial ADP, ATP translocase inhibitor	-2.61
thiethylperazine	Dopamine receptor antagonist	-2.57
alfadolone	GABA receptor agonist	-2.56
ozagrel	Thromboxane synthase inhibitor	-2.54
r(-)-propylnorapomorphine	Dopamine receptor agonist	-2.54
pivmecillinam	Bacterial cell wall synthesis inhibitor	-2.5
etacrynic-acid	Sodium/potassium/chloride transporter inhibitor	-2.5
clebopride	Dopamine receptor antagonist	-2.46
GW-405833	Cannabinoid receptor agonist	-2.44
fenbendazole	Tubulin inhibitor	-2.43
NVP-TAE684	ALK inhibitor	-2.4
oxymetazoline	Adrenergic receptor agonist	-2.39
phenprobamate	Muscle relaxant	-2.37
RS-56812	Serotonin receptor partial agonist	-2.36
NM-PP1	Mutant kinase inhibitor	-2.33
5-nonyloxytryptamine	Serotonin receptor agonist	-2.33
aniracetam	Glutamate receptor agonist	-2.33
aliskiren	Antihypertensive	-2.33
hydralazine	Vasodilator	-2.29
linoleamide	ACAT inhibitor	-2.26
spiperone	Dopamine receptor antagonist	-2.26
triclabendazole	Microtubule inhibitor	-2.23
SCH-58261	Adenosine receptor antagonist	-2.22
papaverine	Phosphodiesterase inhibitor	-2.22
P-1075	ATP channel activator	-2.22
nimesulide	Cyclooxygenase inhibitor	-2.22
rhapontin	Apoptosis stimulant	-2.22
TG100-115	-666	-2.18
malonoben	Protein tyrosine kinase inhibitor	-2.15
carmoxirole	Dopamine receptor agonist	-2.15
VU-0418946-1	HIF modulator	-2.15
carteolol	Adrenergic receptor antagonist	-2.13
enalaprilat	ACE inhibitor	-2.11
ALW-II-49-7	Ephrin inhibitor	-2.11
umbelliferone	Cyclooxygenase inhibitor	-2.09
AZ-628	RAF inhibitor	-2.08
oligomycin-c	ATPase inhibitor	-2.08
tangeritin	Cell cycle inhibitor	-2.08
somatostatin	Somatostatin receptor agonist	-2.04
LY-255283	Leukotriene receptor antagonist	-2.04
BMY-7378	Adrenergic receptor antagonist	-2.04
RX-821002	Adrenergic receptor antagonist	-2.03
VU-0400071-3	Glutamate receptor modulator	-2.02
ponalrestat	Aldose reductase inhibitor	-1.98
midostaurin	FLT3 inhibitor	-1.98
sumatriptan	Serotonin receptor agonist	-1.98
tamibarotene	Retinoid receptor agonist	-1.97
siguazodan	Phosphodiesterase inhibitor	-1.97
reserpine	Vesicular monoamine transporter inhibitor	-1.97
laudanosine	Central nervous system agent	-1.97
guanabenz	Adrenergic receptor agonist	-1.97
hexylcaine	Sodium channel blocker	-1.96
chaetocin	Histone lysine methyltransferase inhibitor	-1.96
AT-9283	JAK inhibitor	-1.94
SQ-22536	Adenylyl cyclase inhibitor	-1.94
clofarabine	Ribonucleoside reductase inhibitor	-1.94
iopanoic-acid	Radiopaque medium	-1.9
vidarabine	Antiviral	-1.9
GS-39783	GABA receptor modulator	-1.87
PKCbeta-inhibitor	PKC inhibitor	-1.84
EI-247	IGF-1 inhibitor	-1.83
quinoclamine	Algicide	-1.83
quinisocaine	Local anesthetic	-1.83
splitomycin	SIRT inhibitor	-1.8
piroxicam	Cyclooxygenase inhibitor	-1.8
liothyronine	Thyroid hormone stimulant	-1.8
isoxicam	Cyclooxygenase inhibitor	-1.8
HO-013	PPAR receptor agonist	-1.76
PP-2	SRC inhibitor	-1.76
PD-123319	Angiotensin receptor antagonist	-1.76
capsazepine	TRPV agonist	-1.76
SB-206553	Serotonin receptor antagonist	-1.76
citalopram	Serotonin reuptake inhibitor	-1.76
17-beta-estradiol	Estrogen receptor agonist	-1.73
dipivefrine	Adrenergic receptor agonist	-1.73
pseudopelletierine	Anthelmintic	-1.72
nortriptyline	Tricyclic antidepressant	-1.71
WAY-170523	Metalloproteinase inhibitor	-1.69
SNS-314	Aurora kinase inhibitor	-1.69
nelfinavir	HIV protease inhibitor	-1.66
esmolol	Adrenergic receptor antagonist	-1.66
RS-100329	Adrenergic receptor antagonist	-1.66
indatraline	Norepinephrine transporter inhibitor	-1.63
RS-16566	Serotonin receptor antagonist	-1.62
metoprolol	Adrenergic receptor antagonist	-1.62
deltaline	Acetylcholine receptor antagonist	-1.62
apoptosis-activator-II	Carboxylesterase inhibitor	-1.62
PLX-4720	RAF inhibitor	-1.62
dihydrodeoxygedunin	Growth factor receptor activator	-1.6
ENMD-2076	FLT3 inhibitor	-1.59
DPN	Estrogen receptor agonist	-1.59
CP466722	ATM kinase inhibitor	-1.59
SB-216763	Glycogen synthase kinase inhibitor	-1.59
isorotenone	Mitochondrial complex I inhibitor	-1.58
tribenoside	Anti-inflammatory	-1.56
lylamine	Cannabinoid receptor agonist	-1.55
dicloxacillin	Bacterial cell wall synthesis inhibitor	-1.55
RK-682	Tyrosine phosphatase inhibitor	-1.54
PF-04217903	c-Met inhibitor	-1.52
hinokitiol	Tyrosinase inhibitor	-1.52
FR-139317	Endothelin receptor antagonist	-1.52
dydrogesterone	Progesterone receptor agonist	-1.52
L-161982	Prostanoid receptor antagonist	-1.52
fluocinonide	Glucocorticoid receptor agonist	-1.52
floxuridine	DNA synthesis inhibitor	-1.52
olopatadine	Histamine receptor antagonist	-1.51
apafant	Platelet activating factor receptor antagonist	-1.48
SC-9	Protein tyrosine kinase activator	-1.48
indolophenanthridine	CALY activator	-1.48
clocortolone	Glucocorticoid receptor agonist	-1.44
amiodarone	Potassium channel blocker	-1.44
UK-356618	Metalloproteinase inhibitor	-1.41
ilomastat	Matrix metalloprotease inhibitor	-1.41
cinacalcet	Calcium channel activator	-1.37
FTI-276	Farnesyltransferase inhibitor	-1.37
SKF-77434	Dopamine receptor agonist	-1.37
calcitriol	Vitamin D receptor agonist	-1.34
IWR-1-ENDO	PARP inhibitor	-1.34
piribedil	Dopamine receptor agonist	-1.34
navitoclax	BCL inhibitor	-1.34
RO-10-5824	Dopamine receptor agonist	-1.33
SCH-23390	Dopamine receptor antagonist	-1.3
meptazinol	Opioid receptor agonist	-1.3
EBPC	Aldose reductase inhibitor	-1.3
ticlopidine	Purinergic receptor antagonist	-1.3
indirubin	CDK inhibitor	-1.28
SDM25N	Opioid receptor antagonist	-1.25
BRD-K34437622	Thymidylate synthase inhibitor	-1.24
trimethobenzamide	Histamine receptor antagonist	-1.23
IAA-94	Chloride channel blocker	-1.23
mifobate	PPAR receptor antagonist	-1.23
XL-147	PI3K inhibitor	-1.2
NNC-55-0396	T-type calcium channel blocker	-1.2
bifemelane	Acetylcholine release stimulant	-1.2
cinchonine	P-glycoprotein inhibitor	-1.2
buspirone	Serotonin receptor agonist	-1.18
SDZ-NKT-343	Tachykinin antagonist	-1.16
lawsone	Coloring agent	-1.16
estriol	Estrogen receptor agonist	-1.16
prothionamide	Mycobacterium tuberculosis enoyl-[acyl-carrier-protein] reductase [NADH] (inhA) inhibitor	-1.13
PD-160170	Neuropeptide receptor antagonist	-1.13
MNITMT	Lymphocyte inhibitor	-1.13
MDM2-inhibitor	MDM inhibitor	-1.13
L-745870	Dopamine receptor antagonist	-1.13
FIT	Opioid receptor agonist	-1.13
prestwick-559	Dopamine receptor agonist	-1.13
angiogenesis-inhibitor	Angiogenesis inhibitor	-1.13
glycocholic-acid	Cholesterol inhibitor	-1.13
bisoprolol	Adrenergic receptor antagonist	-1.13
myriocin	Serine palmitoyltransferase inhibitor	-1.11
tolmetin	Cyclooxygenase inhibitor	-1.09
deracoxib	Cyclooxygenase inhibitor	-1.09
scandenin	Plant compound with antimicrobial activity	-1.07
SSR-69071	Leukocyte elastase inhibitor	-1.06
ambroxol	Sodium channel blocker	-1.06
NU-1025	PARP inhibitor	-1.06
ICI-204448	Opioid receptor agonist	-1.06
RO-60-0175	Serotonin receptor agonist	-1.03
disulfiram	Aldehyde dehydrogenase inhibitor	-1.02
T-0156	Phosphodiesterase inhibitor	-1.02
RS-102221	Serotonin receptor antagonist	-1.02
LY-456236	Glutamate receptor antagonist	-1.02
GW-583340	EGFR inhibitor	-1.02
CV-1808	Adenosine receptor agonist	-1.02
HDAC1-selective	HDAC inhibitor	-1.02
GR-127935	Serotonin receptor antagonist	-0.99
droperidol	Dopamine receptor antagonist	-0.99
rutin	Antioxidant	-0.99
pimozide	Dopamine receptor antagonist	-0.99
KI-16425	Lysophosphatidic acid receptor antagonist	-0.95
didanosine	Nucleoside reverse transcriptase inhibitor	-0.95
SDZ-WAG-994	Adenosine receptor agonist	-0.95
flumetasone	Glucocorticoid receptor agonist	-0.95
aloisine	CDK inhibitor	-0.95
PP-30	RAF inhibitor	-0.92
pentylenetetrazol	GABA receptor antagonist	-0.92
MDL-29951	Glutamate receptor antagonist	-0.92
CHEMBL-374350	NFkB pathway inhibitor	-0.88
emodic-acid	Laxative	-0.88
ganciclovir	DNA polymerase inhibitor	-0.88
thenoyltrifluoroacetone	Chelating agent	-0.85
ecopipam	Dopamine receptor antagonist	-0.85
nitrocaramiphen	Cholinergic receptor antagonist	-0.85
zidovudine	Reverse transcriptase inhibitor	-0.85
gemcitabine	Ribonucleotide reductase inhibitor	-0.82
DY-131	Estrogen receptor agonist	-0.81
stavudine	DNA directed DNA polymerase inhibitor	-0.81
albendazole	Anthelmintic	-0.79
loratadine	Histamine receptor antagonist	-0.78
UBP-302	Glutamate receptor antagonist	-0.78
rimexolone	Glucocorticoid receptor agonist	-0.78
benzylpenicillin	Penicillin binding protein inhibitor	-0.78
bithionol	Autotaxin inhibitor	-0.78
zaldaride	Calmodulin antagonist	-0.75
semaxanib	VEGFR inhibitor	-0.74
metolazone	Carbonic anhydrase inhibitor	-0.74
BCL2-inhibitor	BCL inhibitor	-0.73
salbutamol	Adrenergic receptor agonist	-0.7
UCL-2077	Slow after hyperpolarization channel blocker	-0.7
seneciphylline	Cytochrome P450 inhibitor	-0.7
PHA-665752	c-Met inhibitor	-0.7
pantoprazole	ATPase inhibitor	-0.7
desmethylclozapine	Acetylcholine receptor agonist	-0.7
rhamnetin	HDAC inhibitor	-0.7
phenacetin	Cyclooxygenase inhibitor	-0.7
fenoterol	Adrenergic receptor agonist	-0.7
etomidate	GABA receptor modulator	-0.7
FPL-64176	Calcium channel activator	-0.7
SB-203186	Serotonin receptor antagonist	-0.7
serdemetan	MDM inhibitor	-0.67
T-0070907	PPAR receptor antagonist	-0.67
PHTPP	Estrogen receptor antagonist	-0.67
PSB-069	NTPDase inhibitor	-0.67
terbinafine	Fungal squalene epoxidase inhibitor	-0.67
benproperine	Antitussive	-0.65
rifapentine	RNA polymerase inhibitor	-0.63
GR-113808	Serotonin receptor antagonist	-0.63
isoliquiritigenin	Guanylate cyclase activator	-0.63
betulinic-acid	Apoptosis stimulant	-0.6
noreleagnine	Monoamine oxidase inhibitor	-0.6
o-3M3FBS	phospholipase activator	-0.6
mycophenolic-acid	Dehydrogenase inhibitor	-0.6
raltitrexed	Thymidylate synthase inhibitor	-0.58
epigallocatechin	Nitric oxide synthase inhibitor	-0.56
picotamide	Thromboxane receptor antagonist	-0.56
phenylbutazone	Cyclooxygenase inhibitor	-0.56
phloretin	Sodium/glucose cotransporter inhibitor	-0.56
esomeprazole	ATPase inhibitor	-0.55
avrainvillamide-analog-6	nucleophosmin inhibitor	-0.53
EXO-1	ARF inhibitor	-0.53
flunarizine	Calcium channel blocker	-0.53
molsidomine	Guanylyl cyclase activator	-0.53
dibenzepin	Norepinephrine reuptake inhibitor	-0.53
chlorpromazine	Dopamine receptor antagonist	-0.53
nialamide	Monoamine oxidase inhibitor	-0.53
sulconazole	Sterol demethylase inhibitor	-0.49
ephedrine	Adrenergic receptor agonist	-0.49
pipamperone	Dopamine receptor antagonist	-0.47
VER-155008	HSP inhibitor	-0.46
JZL-184	Monoacylglucerol lipase inhibitor	-0.46
tiabendazole	Angiogenesis inhibitor	-0.46
atorvastatin	HMGCR inhibitor	-0.46
SU-6656	SRC inhibitor	-0.43
naloxone	Opioid receptor antagonist	-0.43
dictamnine	Furoquinoline alkaloid	-0.43
eriodictyol	Cytochrome P450 inhibitor	-0.42
CP-55940	Cannabinoid receptor agonist	-0.42
ritanserin	Serotonin receptor antagonist	-0.42
KI-8751	VEGFR inhibitor	-0.42
guanabenz	-666	-0.42
flutamide	Androgen receptor antagonist	-0.42
bupropion	Dopamine uptake inhibitor	-0.42
mefenamic-acid	Cyclooxygenase inhibitor	-0.42
L-690488	Inositol monophosphatase inhibitor	-0.42
SA-792728	Sphingosine kinase inhibitor	-0.42
triflupromazine	Dopamine receptor antagonist	-0.42
MT-21	Caspase activator	-0.39
tyrphostin-1	EGFR inhibitor	-0.39
RHO-kinase-inhibitor-II	Rho associated kinase inhibitor	-0.39
prochlorperazine	Dopamine receptor antagonist	-0.39
danazol	Estrogen receptor antagonist	-0.39
clobetasol	Glucocorticoid receptor agonist	-0.39
ornidazole	Antiprotozoal	-0.39
primidone	GABA receptor antagonist	-0.36
olaparib	PARP inhibitor	-0.35
brinzolamide	Carbonic anhydrase inhibitor	-0.35
imiloxan	Adrenergic receptor antagonist	-0.35
estropipate	Estrogen receptor agonist	-0.35
ondansetron	Serotonin receptor antagonist	-0.35
venlafaxine	Adrenergic inhibitor	-0.35
desloratadine	Histamine receptor antagonist	-0.32
phenelzine	Monoamine oxidase inhibitor	-0.32
psoromic-acid	Ras GTPase inhibitor	-0.32
talampicillin	Bacterial cell wall synthesis inhibitor	-0.32
metixene	Acetylcholine receptor antagonist	-0.32
ipsapirone	Serotonin receptor agonist	-0.32
estradiol	Contraceptive agent	-0.32
flurbiprofen	Cyclooxygenase inhibitor	-0.32
methapyrilene	Histamine receptor antagonist	-0.32
prednicarbate	Phospholipase activator	-0.31
profenamine	Butyrylcholinesterase inhibitor	-0.31
olanzapine	Dopamine receptor antagonist	-0.28
clarithromycin	Bacterial 50S ribosomal subunit inhibitor	-0.28
PF-3845	FAAH inhibitor	-0.28
fluspirilene	Dopamine receptor antagonist	-0.28
procainamide	Sodium channel blocker	-0.28
temozolomide	DNA alkylating agent	-0.25
wortmannin	PI3K inhibitor	-0.25
sertraline	Serotonin receptor antagonist	-0.25
piperidolate	Acetylcholine receptor antagonist	-0.25
beclometasone	Glucocorticoid receptor agonist	-0.25
naftopidil	Adrenergic receptor antagonist	-0.21
nafadotride	Dopamine receptor antagonist	-0.21
nomilin	HSP inhibitor	-0.21
cyclopenthiazide	Thiazide diuretic	-0.21
GW-1929	PPAR receptor agonist	-0.21
fraxetin	Antioxidant	-0.21
ezetimibe	Niemann-Pick C1-like 1 protein antagonist	-0.21
amperozide	Dopamine receptor antagonist	-0.21
mestinon	Cholinesterase inhibitor	-0.18
pyrimethamine	Dihydrofolate reductase inhibitor	-0.18
methylnorlichexanthone	Aurora kinase inhibitor	-0.18
IKK-2-inhibitor-V	IKK inhibitor	-0.18
irinotecan	Topoisomerase inhibitor	-0.18
alverine	Muscle relaxant	-0.18
BRD-K52219182	Phosphodiesterase inhibitor	-0.18
chlorprothixene	Dopamine receptor antagonist	-0.18
peucedanin	Apoptosis stimulant	-0.14
YM-90709	IL5 inhibitor	-0.14
clemastine	Histamine receptor antagonist	-0.14
prazosin	Adrenergic receptor antagonist	-0.14
doxepin	Histamine receptor antagonist	-0.14
perphenazine	Dopamine receptor antagonist	-0.14
labetalol	Adrenergic receptor antagonist	-0.14
cilostamide	Phosphodiesterase inhibitor	-0.13
saquinavir	HIV protease inhibitor	-0.11
acetohydroxamic-acid	Urease inhibitor	-0.11
olvanil	TRPV agonist	-0.11
necrostatin-1	RIPK inhibitor	-0.11
nafcillin	Bacterial cell wall synthesis inhibitor	-0.11
fluticasone	Glucocorticoid receptor agonist	-0.11
AM-580	Retinoid receptor agonist	-0.11
quetiapine	Dopamine receptor antagonist	-0.11
pifithrin-mu	HSP inhibitor	-0.11
azathioprine	Dehydrogenase inhibitor	-0.11
bumetanide	Solute carrier family member inhibitor	-0.11
flecainide	Sodium channel blocker	-0.11
BAX-channel-blocker	Cytochrome C release inhibitor	-0.11
nitrendipine	Calcium channel blocker	-0.1
mosapride	Serotonin receptor agonist	-0.07
motesanib	KIT inhibitor	-0.07
artesunate	DNA synthesis inhibitor	-0.07
thioproperazine	Dopamine receptor antagonist	-0.07
mevastatin	HMGCR inhibitor	-0.07
fluvoxamine	Selective serotonin reuptake inhibitor (SSRI)	-0.07
mirtazapine	Adrenergic receptor antagonist	-0.07
estradiol-benzoate	Estrogen receptor agonist	-0.07
terconazole	Sterol demethylase inhibitor	-0.07
mexiletine	Sodium channel blocker	-0.07
meclozine	CAR agonist	-0.07
clozapine	Dopamine receptor antagonist	-0.07
rottlerin	MAP kinase inhibitor	-0.07
SA-792541	CDC inhibitor	-0.07
tropicamide	Acetylcholine receptor antagonist	-0.07
pefloxacin	Bacterial DNA gyrase inhibitor	-0.04
aripiprazole	Serotonin receptor agonist	-0.04
pizotifen	Serotonin receptor antagonist	-0.04
lobendazole	Anthelmintic	-0.04
carvedilol	Adrenergic receptor antagonist	-0.04
tolbutamide	ATP channel blocker	-0.04
FGIN-1-27	Inositol monophosphatase inhibitor	-0.04
tolazoline	Adrenergic receptor antagonist	-0.04
flucytosine	Antifungal	-0.03
T-0901317	LXR agonist	-0.03
nefazodone	Adrenergic inhibitor	-0.03
dextromethorphan	Glutamate receptor antagonist	-0.03
sotalol	Adrenergic receptor antagonist	-0.03
promazine	Dopamine receptor antagonist	-0.03
penitrem-a	Potassium channel blocker	-0.03
ketorolac	Cyclooxygenase inhibitor	-0.03
gitoxigenin	ATPase inhibitor	-0.03
pioglitazone	Insulin sensitizer	-0.03
loperamide	Opioid receptor agonist	-0.03
verapamil	Calcium channel blocker	-0.03
nifedipine	Calcium channel blocker	-0.03
itraconazole	Cytochrome P450 inhibitor	-0.02
LFM-A13	BTK inhibitor	-0.02
GR-89696	Opioid receptor agonist	-0.02
KU-55933	ATM kinase inhibitor	-0.02
fluoxetine	Selective serotonin reuptake inhibitor (SSRI)	-0.02
amoxapine	Norepinephrine reuptake inhibitor	-0.02
salmeterol	Adrenergic receptor agonist	-0.02
valdecoxib	Cyclooxygenase inhibitor	-0.02
PK-11195	Benzodiazepine receptor antagonist	-0.01
linopirdine	Potassium channel blocker	-0.01
dipyridamole	Phosphodiesterase inhibitor	-0.01
dantrolene	Calcium channel blocker	-0.01

## Sheet: Sheet 8
Drugs with negative CMap connectivity to the microglial signature
compound_name	compound_description	connectivity_score
anisomycin	DNA synthesis inhibitor	-91.12
emetine	Protein synthesis inhibitor	-90.31
homoharringtonine	Protein synthesis inhibitor	-90.08
narciclasine	Coflilin signaling pathway activator	-85.07
digitoxigenin	ATPase inhibitor	-80.37
troxipide	Glucosamine synthetase stimulant	-78.09
pyrvinium-pamoate	AKT inhibitor	-78.06
roscovitine	CDK inhibitor	-78.04
cycloheximide	Protein synthesis inhibitor	-76.75
isoliquiritigenin	Guanylate cyclase activator	-76.56
chromomycin-a3	DNA binding agent	-75.36
bufalin	ATPase inhibitor	-75.07
proscillaridin	ATPase inhibitor	-73.31
sarmentogenin	ATPase inhibitor	-70.73
levomepromazine	Dopamine receptor antagonist	-70.47
mitoxantrone	Topoisomerase inhibitor	-69.69
XMD-1150	Leucine rich repeat kinase inhibitor	-68.63
tranilast	Angiogenesis inhibitor	-68.21
cymarin	ATPase inhibitor	-67.55
periplocymarin	Apoptosis stimulant	-65.95
lasalocid	Bacterial permeability inducer	-64.69
digoxin	ATPase inhibitor	-64.55
PF-562271	Focal adhesion kinase inhibitor	-64.51
kenpaullone	CDK inhibitor	-63.43
argatroban	Thrombin inhibitor	-62.21
cinobufagin	ATPase inhibitor	-60.57
ellipticine	Topoisomerase inhibitor	-59.02
fluorometholone	Glucocorticoid receptor agonist	-58.71
mitomycin-c	DNA alkylating agent	-58.12
prunetin	Breast cancer resistance protein inhibitor	-58.03
RHO-kinase-inhibitor-III[rockout]	Rho associated kinase inhibitor	-57.9
sulconazole	Sterol demethylase inhibitor	-55.98
bifonazole	Sterol demethylase inhibitor	-55.81
itopride	Dopamine receptor antagonist	-55.6
cyclopamine	Smoothened receptor antagonist	-55.47
oligomycin-a	ATP synthase inhibitor	-54.47
metanephrine	Epinephrine metabolite	-52.03
JNK-9L	JNK inhibitor	-51.44
QL-XII-47	BTK inhibitor	-50.97
SB-206553	Serotonin receptor antagonist	-50.83
naltrexone	Opioid receptor antagonist	-50.31
BI-2536	PLK inhibitor	-48.62
SA-63133	-666	-48.31
azelastine	Histamine receptor antagonist	-46.78
phloretin	Sodium/glucose cotransporter inhibitor	-45.71
clocortolone	Glucocorticoid receptor agonist	-45.68
SDZ-NKT-343	Tachykinin antagonist	-45.35
daunorubicin	RNA synthesis inhibitor	-43.69
CGK-733	ATR kinase inhibitor	-43.55
HU-211	Glutamate receptor antagonist	-43.06
edaravone	Nootropic agent	-42.91
busulfan	DNA inhibitor	-42.79
peucedanin	Apoptosis stimulant	-42.5
methylnorlichexanthone	Aurora kinase inhibitor	-42.4
butein	EGFR inhibitor	-42.26
z-prolyl-prolinal	Prolyl endopeptidase inhibitor	-42.2
l-erythro-MAPP	negative control for D-erythro-MAPP	-41.41
L-741742	Dopamine receptor antagonist	-40.69
BCI-hydrochloride	Protein phosphatase inhibitor	-40.28
prometon	Photosynthesis inhibitor	-40.17
ouabain	ATPase inhibitor	-40.09
pidorubicine	Topoisomerase inhibitor	-38.16
benzopurpurin-4b	HIV entry inhibitor	-38.12
MAZ-51	VEGFR inhibitor	-37.42
methotrexate	Dihydrofolate reductase inhibitor	-36.81
scopoline	Acetylcholine receptor antagonist	-35.38
L-690488	Inositol monophosphatase inhibitor	-34.6
digitoxin	ATPase inhibitor	-34.53
lumicolchicine	Colchicine isomer, non-binder of microtubules	-34.26
BD-1047	Adrenergic receptor antagonist	-33.69
AT-7519	CDK inhibitor	-33.35
HA-1004	Calcium channel blocker	-33.31
QL-X-138	MTOR inhibitor	-33.04
CCCP	Mitochondrial oxidative phosphorylation uncoupler	-32.88
U-99194	Dopamine receptor antagonist	-32.82
cefpodoxime	Bacterial cell wall synthesis inhibitor	-32.34
aloisine	CDK inhibitor	-32.07
strophanthidin	ATPase inhibitor	-30.9
ergocryptine	Dopamine agonist	-30.89
aspirin	Cyclooxygenase inhibitor	-30.88
heliomycin	ATP synthase inhibitor	-30.2
IAA-94	Chloride channel blocker	-30.03
penicillic-acid	other antibiotic	-29.67
NU-7441	DNA dependent protein kinase inhibitor	-29.64
iodoacetic-acid	Cysteine peptidase inhibitor	-29.34
MDL-11939	Serotonin receptor antagonist	-29.32
tamibarotene	Retinoid receptor agonist	-29.08
dictamnine	Furoquinoline alkaloid	-28.92
lysylphenylalanyl-tyrosine	Heparin activation inhibitor	-28.62
tunicamycin	GLCNAC phosphotransferase inhibitor	-28.55
mecillinam	Bacterial cell wall synthesis inhibitor	-28.34
WZ-4-145	EGFR inhibitor	-28.26
ER-27319	Mediator release inhibitor	-28.05
deltaline	Acetylcholine receptor antagonist	-27.96
BMS-345541	IKK inhibitor	-27.56
perindopril	ACE inhibitor	-27.36
NBI-27914	CRF receptor antagonist	-27.17
doxercalciferol	Vitamin D receptor agonist	-27.14
BNTX	Opioid receptor antagonist	-26.91
embelin	HCV inhibitor	-26.23
rucaparib	PARP inhibitor	-26.12
dactinomycin	RNA polymerase inhibitor	-26
malonoben	Protein tyrosine kinase inhibitor	-25.95
bisindolylmaleimide	CDK inhibitor	-25.66
RS-102221	Serotonin receptor antagonist	-25.36
NSC-663284	CDC inhibitor	-25.35
7,4'-dihydroxyflavone	Opioid receptor antagonist	-25.16
TGX-221	PI3K inhibitor	-25.15
SU-11274	Hepatocyte growth factor receptor inhibitor	-25.11
diprotin-a	Dipeptidyl peptidase inhibitor	-24.72
verrucarin-a	Protein synthesis inhibitor	-24.57
bisindolylmaleimide-ix	CDK inhibitor	-24.43
SYK-inhibitor	SYK inhibitor	-24.01
GSK-1059615	PI3K inhibitor	-23.94
GR-55562	Serotonin receptor antagonist	-23.76
GR-127935	Serotonin receptor antagonist	-23.16
cephaeline	Protein synthesis inhibitor	-23.01
reserpine	Vesicular monoamine transporter inhibitor	-22.91
flupentixol	Dopamine receptor antagonist	-22.87
PI-828	PI3K inhibitor	-22.69
AZ-628	RAF inhibitor	-22.52
tyrphostin-AG-835	Protein tyrosine kinase inhibitor	-22.49
GW-5074	Leucine rich repeat kinase inhibitor	-22.45
dehydroisoandosterone	GABA receptor modulator	-22.18
monastrol	Kinesin-like spindle protein inhibitor	-22.09
amonafide	Topoisomerase inhibitor	-21.81
dilazep	Adenosine reuptake inhibitor	-21.79
trap-101	Nociceptin/orphanin FQ (NOP) receptor antagonist	-21.35
fludrocortisone	Glucocorticoid receptor agonist	-21.25
cirazoline	Adrenergic receptor agonist	-21.04
tyrphostin-AG-1288	TNF production inhibitor	-20.74
prestwick-559	Dopamine receptor agonist	-20.74
daidzein	Estrogen receptor agonist	-20.68
hydrocortisone	Glucocorticoid receptor agonist	-20.45
isogedunin	HSP inhibitor	-20.26
clebopride	Dopamine receptor antagonist	-19.79
pazufloxacin	Topoisomerase inhibitor	-19.76
JAK3-inhibitor-V	JAK inhibitor	-19.76
apoptosis-activator-II	Carboxylesterase inhibitor	-19.58
sunitinib	FLT3 inhibitor	-19.47
Ro-04-6790	Serotonin receptor antagonist	-19.43
diltiazem	Calcium channel blocker	-19.43
flucytosine	Antifungal	-19.22
protopine	Histamine receptor antagonist	-19.02
stavudine	DNA directed DNA polymerase inhibitor	-19.01
doxorubicin	Topoisomerase inhibitor	-18.82
benproperine	Antitussive	-18.78
zileuton	Leukotriene inhibitor	-18.78
physostigmine	Acetylcholinesterase inhibitor	-18.69
mexiletine	Sodium channel blocker	-18.16
NTNCB	Neuropeptide receptor antagonist	-18.12
paxilline	Potassium channel blocker	-18
importazole	Importin-beta transport receptor inhibitor	-17.83
gibberellic-acid	NFkB pathway inhibitor	-17.83
myricetin	Androgen receptor agonist	-17.63
hyperforin	Cyclooxygenase inhibitor	-17.61
CGP-60474	CDK inhibitor	-17.3
candesartan	Angiotensin receptor antagonist	-17.18
clemastine	Histamine receptor antagonist	-17.14
griseofulvin	Tubulin inhibitor	-16.91
iobenguane	Antineoplastic	-16.53
FIT	Opioid receptor agonist	-16.4
prostratin	PKC activator	-16.14
oxibendazole	Tubulin inhibitor	-15.33
PD-198306	MAP kinase inhibitor	-15.26
AZD-8055	MTOR inhibitor	-15.17
CO-101244	Ionotropic glutamate receptor antagonist	-15.15
ryuvidine	Histone lysine methyltransferase inhibitor	-15.06
naloxone	Opioid receptor antagonist	-14.94
PIK-75	DNA protein kinase inhibitor	-14.93
tetramethylsilane	Internal standard for NMR spectroscopy	-14.72
SA-1478088	-666	-14.67
nikkomycin	Chitin inhibitor	-14.63
oxybutynin	Acetylcholine receptor antagonist	-14.51
PCA-4248	Platelet activating factor receptor antagonist	-14.41
cabergoline	Dopamine receptor agonist	-14.34
tyrphostin-AG-126	ERK1 and ERK2 phosphorylation inhibitor	-14.32
scandenin	Plant compound with antimicrobial activity	-14.14
YC-1	Guanylyl cyclase activator	-14.1
hydralazine	Vasodilator	-14.08
tyrphostin-A9	Protein tyrosine kinase inhibitor	-14.01
bithionol	Autotaxin inhibitor	-14
benzatropine	Acetylcholine receptor antagonist	-13.98
flumetasone	Glucocorticoid receptor agonist	-13.91
nicergoline	Adrenergic receptor antagonist	-13.79
RS-504393	CC chemokine receptor antagonist	-13.76
dichloroacetic-acid	Pyruvate dehydrogenase kinase inhibitor	-13.42
L-733060	Tachykinin antagonist	-13.31
fluvastatin	HMGCR inhibitor	-13.28
homosalate	HSP inducer	-13.26
celastrol	Anti-inflammatory	-13.11
L-152804	Neuropeptide receptor antagonist	-13.06
RS-56812	Serotonin receptor partial agonist	-12.8
IKK-16	IKK inhibitor	-12.73
salsolinol	Monoamine oxidase inhibitor	-12.65
icosapent	Platelet aggregation inhibitor	-12.52
NU-7026	DNA dependent protein kinase inhibitor	-12.46
lobelanidine	Acetylcholine receptor antagonist	-12.24
pinocembrin	CYP1B1 inhibitor	-11.94
NS-3694	Glutamate receptor antagonist	-11.89
ritonavir	HIV protease inhibitor	-11.81
nalbuphine	Opioid receptor agonist	-11.81
BMS-182874	Endothelin receptor antagonist	-11.7
CD-437	Retinoid receptor agonist	-11.56
karakoline	Phytotoxin	-11.44
PSB-1115	Adenosine receptor antagonist	-11.34
MT-21	Caspase activator	-11.32
flavokavain-b	Antineoplastic	-11.24
racephedrine	Adrenergic receptor agonist	-11.15
SC-560	Cyclooxygenase inhibitor	-10.83
CMPD-1	p38 MAPK inhibitor	-10.79
vinburnine	Adrenergic receptor antagonist	-10.74
OM-137	Aurora kinase inhibitor	-10.53
reversine	Aurora kinase inhibitor	-10.51
teniposide	Topoisomerase inhibitor	-10.48
IKK-2-inhibitor-V	IKK inhibitor	-10.39
hexylcaine	Sodium channel blocker	-10.28
cinchonine	P-glycoprotein inhibitor	-10.07
phylloquinone	Vitamin K	-10.06
methoprene-acid	Retinoid receptor agonist	-9.91
SSR-69071	Leukocyte elastase inhibitor	-9.84
4-hydroxy-2-nonenal	Cytotoxic lipid peroxidation product	-9.83
A-443644	AKT inhibitor	-9.83
sirolimus	MTOR inhibitor	-9.81
amperozide	Dopamine receptor antagonist	-9.64
KIN001-127	ITK inhibitor	-9.58
eprosartan	Angiotensin receptor antagonist	-9.55
16,16-dimethylprostaglandin-e2	Prostanoid receptor agonist	-9.26
cercosporin	Photoactivated toxin	-9.22
dubinidine	Anti-epileptic	-9.22
PP-2	SRC inhibitor	-9
enzastaurin	PKC inhibitor	-8.88
podophyllotoxin	Microtubule inhibitor	-8.69
T-0070907	PPAR receptor antagonist	-8.67
INCA-6	Calcineurin inhibitor	-8.61
SB-408124	Orexin receptor antagonist	-8.56
ambelline	Plant alkaloid	-8.47
TW-37	BCL inhibitor	-8.46
pyrazolanthrone	JNK inhibitor	-8.41
glycodeoxycholic-acid	Apoptosis stimulant	-8.38
MNITMT	Lymphocyte inhibitor	-8.36
strychnine	Acetylcholine receptor antagonist	-8.25
piceatannol	SYK inhibitor	-8.24
GW-3965	LXR agonist	-8.24
tangeritin	Cell cycle inhibitor	-8.21
radicicol	HSP inhibitor	-8.12
MG-132	Proteasome inhibitor	-8.1
fenoterol	Adrenergic receptor agonist	-8.1
evoxine	Furoquinoline alkaloid	-8.09
miglitol	Glucosidase inhibitor	-7.98
RO-3306	CDK inhibitor	-7.97
VU-0400193-3	Glutamate receptor modulator	-7.89
estriol	Estrogen receptor agonist	-7.85
aristolochic-acid	Phospholipase inhibitor	-7.81
GW-583340	EGFR inhibitor	-7.74
manumycin-a	Farnesyltransferase inhibitor	-7.65
meprylcaine	Local anesthetic	-7.56
lapatinib	EGFR inhibitor	-7.54
tianeptine	Selective serotonin reuptake enhancer (SSRE)	-7.52
fenoldopam	Dopamine receptor agonist	-7.51
glycopyrrolate	Acetylcholine receptor antagonist	-7.48
EMF-BCA1-64	Caspase inhibitor	-7.46
WH-4023	SRC inhibitor	-7.33
temozolomide	DNA alkylating agent	-7.3
phenethyl-isothiocyanate	Antineoplastic	-7.25
cyclopiazonic-acid	ATPase inhibitor	-7.13
praziquantel	Anthelmintic	-7.08
alvocidib	CDK inhibitor	-7.05
kawain	Calcium channel modulator	-7
everolimus	MTOR inhibitor	-6.98
dipropyl-dopamine	Dopamine receptor agonist	-6.96
SU-6656	SRC inhibitor	-6.58
triamcinolone	Glucocorticoid receptor agonist	-6.5
spiroxatrine	Serotonin receptor antagonist	-6.46
neurodazine	Neurogenesis of non-pluripotent C2C12 myoblast inducer	-6.41
helveticoside	ATPase inhibitor	-6.38
GDC-0941	PI3K inhibitor	-6.32
AZD-7762	CHK inhibitor	-6.32
diphencyprone	Immunostimulant	-6.29
dihydrodeoxygedunin	Growth factor receptor activator	-6.25
MEK1-2-inhibitor	MEK inhibitor	-6.24
BD-1008	Sigma receptor antagonist	-6.2
idarubicin	Topoisomerase inhibitor	-6.17
YM-155	Survivin inhibitor	-6.15
buflomedil	Adrenergic receptor antagonist	-6.14
GSK-3-inhibitor-IX	Glycogen synthase kinase inhibitor	-6.06
GSK-0660	PPAR receptor antagonist	-6.03
suloctidil	Adrenergic receptor antagonist	-6.03
lamotrigine	Serotonin receptor antagonist	-5.96
dephostatin	Tyrosine phosphatase inhibitor	-5.95
olaparib	PARP inhibitor	-5.94
gatifloxacin	Bacterial DNA gyrase inhibitor	-5.92
clofibric-acid	PPAR receptor agonist	-5.92
naftidrofuryl	Adrenergic receptor antagonist	-5.88
TER-14687	Inhibitor of translocation of PKCq in T cells	-5.78
acebutolol	Adrenergic receptor antagonist	-5.57
metolazone	Carbonic anhydrase inhibitor	-5.53
clozapine	Dopamine receptor antagonist	-5.52
6-aminochrysene	Transferase inhibitor	-5.5
cytarabine	Ribonucleotide reductase inhibitor	-5.49
hydrocortisone	Glucocorticoid receptor agonist	-5.46
mercaptopurine	Immunosuppressant	-5.38
dihydroergocristine	Adrenergic receptor antagonist	-5.31
meclozine	CAR agonist	-5.31
dexamethasone	Glucocorticoid receptor agonist	-5.29
EI-231	Casein kinase inhibitor	-5.18
niguldipine	Calcium channel blocker	-5.17
ENMD-2076	FLT3 inhibitor	-5.16
bisbenzimide	DNA binding agent	-5.14
xanthohumol	ATPase inhibitor	-5.11
noretynodrel	Progestogen hormone	-5.05
SNS-314	Aurora kinase inhibitor	-5
DAU-5884	Acetylcholine receptor antagonist	-4.99
puromycin	Protein synthesis inhibitor	-4.97
glycocholic-acid	Cholesterol inhibitor	-4.97
SIB-1893	Glutamate receptor antagonist	-4.93
BRD-K66896231	Acetylcholinesterase inhibitor	-4.9
GSK-461364	PLK inhibitor	-4.9
trimidox	Ribonucleotide reductase inhibitor	-4.79
prednisolone	Glucocorticoid receptor agonist	-4.78
hydroquinidine	Antiarrhythmic	-4.74
iocetamic-acid	Radiopaque medium	-4.7
nifedipine	Calcium channel blocker	-4.69
lupanine	Sodium channel blocker	-4.67
l-stepholidine	Dopamine receptor antagonist	-4.66
propantheline	Acetylcholine receptor antagonist	-4.66
KN-93	Calcium-calmodulin dependent protein kinase inhibitor	-4.65
triamcinolone	Glucocorticoid receptor agonist	-4.63
TG-101348	FLT3 inhibitor	-4.55
DCPIB	Chloride channel blocker	-4.55
diphenyleneiodonium	Nitric oxide synthase inhibitor	-4.51
gestrinone	Progesterone receptor antagonist	-4.5
mestinon	Cholinesterase inhibitor	-4.44
epigallocatechin	Nitric oxide synthase inhibitor	-4.37
fananserin	Dopamine receptor antagonist	-4.36
olomoucine	CDK inhibitor	-4.28
CS-1657	PARP inhibitor	-4.22
arctigenin	MEK inhibitor	-4.19
CL-218872	GABA receptor agonist	-4.15
ozagrel	Thromboxane synthase inhibitor	-4.14
JWE-035	Aurora kinase inhibitor	-4.09
veliparib	PARP inhibitor	-4.09
ascorbic-acid	Antioxidant	-4.02
ketanserin	Serotonin receptor antagonist	-3.98
thiotepa	Cytochrome P450 inhibitor	-3.95
quinisocaine	Local anesthetic	-3.93
solanine	Acetylcholinesterase inhibitor	-3.81
SB-218078	CHK inhibitor	-3.81
asiaticoside	Antineoplastic	-3.79
RO-04-5595	Glutamate receptor antagonist	-3.66
metergoline	Dopamine receptor agonist	-3.64
rosmarinic-acid	GABA transaminase inhibitor	-3.63
epicatechin	Bacterial DNA gyrase inhibitor	-3.62
thapsigargin	ATPase inhibitor	-3.56
wortmannin	PI3K inhibitor	-3.52
GR-103691	Dopamine receptor antagonist	-3.49
linoleic-acid	Oxidative stress inducer	-3.3
cefalexin	Bacterial cell wall synthesis inhibitor	-3.24
chloroxine	Opioid receptor antagonist	-3.23
Y-27152	Potassium channel activator	-3.21
mestanolone	Androgenic steroid	-3.17
apicidin	HDAC inhibitor	-3.17
sulpiride	Dopamine receptor antagonist	-3.17
L-368899	Oxytocin receptor antagonist	-3.14
danusertib	Aurora kinase inhibitor	-3.14
eicosatetraynoic-acid	Cyclooxygenase inhibitor	-3.1
fenobam	Glutamate receptor antagonist	-3.03
5-methoxytryptamine	Serotonin receptor agonist	-3
aminoglutethimide	Glucocorticoid receptor antagonist	-3
PSB-36	Adenosine receptor antagonist	-3
SB-366791	TRPV antagonist	-2.97
HG-5-113-01	Protein kinase inhibitor	-2.92
biperiden	Acetylcholine receptor antagonist	-2.92
NCH-51	HDAC inhibitor	-2.92
QX-314	Sodium channel blocker	-2.89
triciribine	AKT inhibitor	-2.89
palonosetron	Serotonin receptor antagonist	-2.85
vincristine	Tubulin inhibitor	-2.83
4-(2-Amino-ethyl)-benzenesulfonamide	carbonic anhydrase inhibitor	-2.82
metyrapone	Cytochrome P450 inhibitor	-2.82
ketoconazole	Sterol demethylase inhibitor	-2.79
losartan	Angiotensin receptor antagonist	-2.78
hexylresorcinol	Local anesthetic	-2.66
delcorine	Antiarrhythmic	-2.64
CAY-10618	NAMPT inhibitor	-2.57
fenbufen	Cyclooxygenase inhibitor	-2.57
pinacidil	ATP channel activator	-2.54
hydrastinine	Haemostatic agent	-2.54
L-670596	Prostanoid receptor antagonist	-2.51
damnacanthal	SRC inhibitor	-2.5
ipsapirone	Serotonin receptor agonist	-2.5
3,3'-diindolylmethane	CHK inhibitor	-2.48
docosatrienoic-acid	LTB4 inhibitor	-2.47
flavanone	11-beta-HSD1 inhibitor	-2.47
CP466722	ATM kinase inhibitor	-2.43
VU-0413807-2	Calcium channel blocker	-2.4
CL-82198	Metalloproteinase inhibitor	-2.4
BX-795	IKK inhibitor	-2.4
kinetin-riboside	Apoptosis stimulant	-2.4
niclosamide	DNA replication inhibitor	-2.36
avrainvillamide-analog-2	nucleophosmin inhibitor	-2.33
goserelin	Gonadotropin releasing factor hormone receptor agonist	-2.33
oxindole-I	VEGFR inhibitor	-2.29
WZ-3146	EGFR inhibitor	-2.28
levcromakalim	Potassium channel activator	-2.26
ZK-756326	CC chemokine receptor ligand	-2.26
tyrphostin-B44	EGFR inhibitor	-2.23
EI-247	IGF-1 inhibitor	-2.22
tyrphostin-46	Tyrosine kinase inhibitor	-2.22
dinoprostone	Prostanoid receptor agonist	-2.22
granisetron	Serotonin receptor antagonist	-2.2
fenpiverinium	Acetylcholine receptor antagonist	-2.2
prostaglandin-e1	Prostanoid receptor agonist	-2.2
CGP-55845	GABA receptor antagonist	-2.18
proguanil	Dihydrofolate reductase inhibitor	-2.18
mofezolac	Cyclooxygenase inhibitor	-2.15
clofarabine	Ribonucleoside reductase inhibitor	-2.15
quinidine	Sodium channel blocker	-2.15
hydrastine	Tyrosine hydroxylase inhibitor	-2.11
benperidol	Dopamine receptor antagonist	-2.11
mepacrine	Cytokine production inhibitor	-2.1
cimaterol	Adrenergic receptor agonist	-2.08
flumazenil	Benzodiazepine receptor antagonist	-2.06
acetylcholine	Acetylcholine receptor agonist	-2.04
roxatidine	Histamine receptor antagonist	-1.97
JAK3-inhibitor-I	JAK inhibitor	-1.97
isorotenone	Mitochondrial complex I inhibitor	-1.97
toltrazuril	Antiprotozoal	-1.97
labetalol	Adrenergic receptor antagonist	-1.97
selinidin	Mast cell stabilizer	-1.96
rimexolone	Glucocorticoid receptor agonist	-1.94
ritodrine	Adrenergic receptor agonist	-1.94
VAMA-37	DNA dependent protein kinase inhibitor	-1.94
benzanthrone	Aromatic hydrocarbon derivative	-1.93
ZM-241385	Adenosine receptor antagonist	-1.9
ponalrestat	Aldose reductase inhibitor	-1.9
ecopipam	Dopamine receptor antagonist	-1.9
GR-32191	Thromboxane receptor antagonist	-1.9
betahistine	Histamine receptor agonist	-1.9
ranitidine	Histamine receptor antagonist	-1.87
arvanil	TRPV agonist	-1.87
tolazamide	ATP channel blocker	-1.87
cladribine	Adenosine deaminase inhibitor	-1.87
VU-0418946-1	HIF modulator	-1.87
BAX-channel-blocker	Cytochrome C release inhibitor	-1.87
gliquidone	Sulfonylurea	-1.86
perospirone	Dopamine receptor antagonist	-1.84
dovitinib	EGFR inhibitor	-1.83
axitinib	PDGFR receptor inhibitor	-1.83
quercetin	Polar auxin transport inhibitor	-1.83
flunisolide	Cytochrome P450 inhibitor	-1.83
BMY-7378	Adrenergic receptor antagonist	-1.83
rottlerin	MAP kinase inhibitor	-1.83
AMG-9810	TRPV antagonist	-1.81
HNHA	HDAC inhibitor	-1.8
imperatorin	CDK inhibitor	-1.8
cyproterone	Androgen receptor antagonist	-1.8
gitoxigenin	ATPase inhibitor	-1.8
EHNA	Adenosine deaminase inhibitor	-1.77
topiramate	Carbonic anhydrase inhibitor	-1.76
prothionamide	Mycobacterium tuberculosis enoyl-[acyl-carrier-protein] reductase [NADH] (inhA) inhibitor	-1.76
tropicamide	Acetylcholine receptor antagonist	-1.76
RO-15-4513	GABA benzodiazepine site receptor inverse agonist	-1.75
mycophenolic-acid	Dehydrogenase inhibitor	-1.75
oleoylethanolamide	Cannabinoid receptor agonist	-1.73
ethambutol	Bacterial cell wall synthesis inhibitor	-1.73
RG-14620	EGFR inhibitor	-1.73
GS-39783	GABA receptor modulator	-1.73
aminomethyltransferase	Nitric oxide synthase inhibitor	-1.73
AG-592	Tyrosine kinase inhibitor	-1.73
cetirizine	Histamine receptor antagonist	-1.73
caffeine	Adenosine receptor antagonist	-1.69
PNU-22394	Serotonin receptor agonist	-1.66
dihydro-7-desacetyldeoxygedunin	HSP inhibitor	-1.66
WYE-354	MTOR inhibitor	-1.66
etilefrine	Adrenergic receptor agonist	-1.66
securinine	GABA receptor antagonist	-1.63
stiripentol	GABA uptake inhibitor	-1.62
atracurium	Acetylcholine receptor antagonist	-1.62
pirenzepine	Acetylcholine receptor antagonist	-1.62
piroxicam	Cyclooxygenase inhibitor	-1.62
venlafaxine	Adrenergic inhibitor	-1.62
quinoclamine	Algicide	-1.59
THM-I-94	HDAC inhibitor	-1.59
HSP90-inhibitor	HSP inhibitor	-1.59
quizartinib	FLT3 inhibitor	-1.59
metronidazole	DNA inhibitor	-1.55
nilutamide	Androgen receptor antagonist	-1.55
repaglinide	Insulin secretagogue	-1.55
pilocarpine	Acetylcholine receptor agonist	-1.55
cefixime	Bacterial cell wall synthesis inhibitor	-1.52
fludarabine	DNA synthesis inhibitor	-1.51
telmisartan	Angiotensin receptor antagonist	-1.48
isoflupredone	Glucocorticoid receptor agonist	-1.48
diflorasone	Corticosteroid agonist	-1.48
BW-B70C	Lipoxygenase inhibitor	-1.48
isotretinoin	Retinoid receptor agonist	-1.48
erbstatin-analog	EGFR inhibitor	-1.48
olopatadine	Histamine receptor antagonist	-1.48
tramadol	Norepinephrine reuptake inhibitor	-1.44
ZK-164015	Estrogen receptor antagonist	-1.44
vinpocetine	Phosphodiesterase inhibitor	-1.44
ICI-199441	Opioid receptor agonist	-1.44
diazepam	Benzodiazepine receptor agonist	-1.44
CGP-71683	Neuropeptide receptor antagonist	-1.44
oleylethanolamide	Cannabinoid receptor agonist	-1.44
GW-7647	PPAR receptor agonist	-1.44
profenamine	Butyrylcholinesterase inhibitor	-1.44
KIN001-244	Phosphoinositide dependent kinase inhibitor	-1.41
etoposide	Topoisomerase inhibitor	-1.38
CAY-10585	HIF modulator	-1.37
Y-134	Estrogen receptor antagonist	-1.37
protein-tyrosine-phosphatase-inhibitor-IV	Tyrosine phosphatase inhibitor	-1.37
betamethasone	Glucocorticoid receptor agonist	-1.37
milrinone	Phosphodiesterase inhibitor	-1.37
elvitegravir	HIV integrase inhibitor	-1.34
EXO-1	ARF inhibitor	-1.34
dantron	Laxative	-1.34
imatinib	BCR-ABL kinase inhibitor	-1.33
GR-113808	Serotonin receptor antagonist	-1.3
cinanserin	Serotonin receptor antagonist	-1.3
NVP-TAE684	ALK inhibitor	-1.3
SANT-1	Smoothened receptor antagonist	-1.27
diclofenac	Cyclooxygenase inhibitor	-1.27
desoxycortone	Mineralocorticoid receptor agonist	-1.26
neratinib	EGFR inhibitor	-1.26
pyrazinamide	Fatty acid synthase inhibitor	-1.24
methimazole	Antithyroid	-1.24
dehydrocholic-acid	Bile acid	-1.23
phorbol-12-myristate-13-acetate	PKC activator	-1.23
vesamicol	Acetylcholinesterase inhibitor	-1.23
FCCP	Mitochondrial oxidative phosphorylation uncoupler	-1.23
tizanidine	Adrenergic receptor agonist	-1.23
cyclazosin	Adrenergic receptor antagonist	-1.23
KU-0060648	DNA dependent protein kinase inhibitor	-1.23
dacinostat	HDAC inhibitor	-1.2
zebularine	DNA methyltransferase inhibitor	-1.2
RO-25-6981	Ionotropic glutamate receptor antagonist	-1.2
diphemanil	Acetylcholine receptor antagonist	-1.2
iopanoic-acid	Radiopaque medium	-1.2
beclometasone	Glucocorticoid receptor agonist	-1.2
BAY-36-7620	Glutamate receptor antagonist	-1.16
arachidonyl-trifluoro-methane	Cytosolic phospholipase inhibitor	-1.16
oxiconazole	Bacterial cell wall synthesis inhibitor	-1.15
cefatrizine	Bacterial cell wall synthesis inhibitor	-1.14
LY-341495	Glutamate receptor antagonist	-1.13
SA-792541	CDC inhibitor	-1.13
naltrindole	Opioid receptor antagonist	-1.12
trimethobenzamide	Histamine receptor antagonist	-1.09
morphothebaine	Adrenergic receptor antagonist	-1.09
benzylpenicillin	Penicillin binding protein inhibitor	-1.09
indirubin	CDK inhibitor	-1.09
I-OMe-AG-538	IGF-1 inhibitor	-1.09
phenacetin	Cyclooxygenase inhibitor	-1.04
7b-cis	Exportin antagonist	-1.02
PNU-96415E	Dopamine receptor antagonist	-1.02
orphenadrine	Acetylcholine receptor antagonist	-1.02
MDM2-inhibitor	MDM inhibitor	-1.02
irbesartan	Angiotensin receptor antagonist	-1.02
minoxidil	KATP activator	-1.02
aminoindazole	Ionophore	-0.99
VER-155008	HSP inhibitor	-0.99
selumetinib	MEK inhibitor	-0.99
naphazoline	Adrenergic receptor agonist	-0.99
dofetilide	Potassium channel blocker	-0.98
brazilin	Nitric oxide production inhibitor	-0.98
naltriben	Opioid receptor antagonist	-0.97
U-0126	MEK inhibitor	-0.95
TWS-119	Glycogen synthase kinase inhibitor	-0.95
SU-4312	PDGFR receptor inhibitor	-0.95
tosyllysyl-chloromethyl-ketone	Chymotrypsin inhibitor	-0.95
cilnidipine	Calcium channel blocker	-0.95
torasemide	Electrolyte reabsorption inhibitor	-0.95
guanfacine	Adrenergic receptor agonist	-0.95
febuxostat	Xanthine oxidase inhibitor	-0.94
SB-239063	p38 MAPK inhibitor	-0.92
oxybenzone	Lipase inhibitor	-0.92
LY-165163	Serotonin receptor antagonist	-0.92
bromocriptine	Dopamine receptor agonist	-0.92
BAPTA-AM	Potassium channel blocker	-0.92
tolmetin	Cyclooxygenase inhibitor	-0.92
naringenin	Aromatase inhibitor	-0.92
fluocinonide	Glucocorticoid receptor agonist	-0.92
ingenol	PKC activator	-0.88
L-690330	Inositol monophosphatase inhibitor	-0.88
TPCA-1	IKK inhibitor	-0.88
semaxanib	VEGFR inhibitor	-0.85
RO-60-0175	Serotonin receptor agonist	-0.85
LY-288513	CCK receptor antagonist	-0.85
ivachtin	Caspase inhibitor	-0.85
hinokitiol	Tyrosinase inhibitor	-0.85
coumaric-acid	Antioxidant	-0.85
carprofen	Cyclooxygenase inhibitor	-0.85
brucine	Glycine receptor antagonist	-0.85
amsacrine	Topoisomerase inhibitor	-0.85
methapyrilene	Histamine receptor antagonist	-0.85
met-leu-phe	-666	-0.82
dichlorobenzamil	Sodium/calcium exchange inhibitor	-0.81
carteolol	Adrenergic receptor antagonist	-0.81
prednisolone	Glucocorticoid receptor agonist	-0.81
NF-449	Purinergic receptor antagonist	-0.79
ebselen	H+/K+-ATPase inhibitor	-0.78
piretanide	Glucocorticoid receptor agonist	-0.78
necrostatin-1	RIPK inhibitor	-0.78
RO-16-6941	Monoamine oxidase inhibitor	-0.78
HEAT	Adrenergic receptor antagonist	-0.78
cortisone	Glucocorticoid receptor agonist	-0.78
mefenamic-acid	Cyclooxygenase inhibitor	-0.78
nisoldipine	Calcium channel blocker	-0.77
zatebradine	HCN channel blocker	-0.74
4,5,6,7-tetrabromobenzotriazole	Casein kinase inhibitor	-0.74
CO-102862	Sodium channel blocker	-0.74
tyrphostin-AG-555	EGFR inhibitor	-0.74
erythromycin	NFkB pathway inhibitor	-0.74
SB-258585	Serotonin receptor antagonist	-0.73
nitazoxanide	Pyruvate ferredoxin oxidoreductase inhibitor	-0.7
papaverine	Phosphodiesterase inhibitor	-0.7
hyoscyamine	Acetylcholine receptor antagonist	-0.7
fluticasone	Glucocorticoid receptor agonist	-0.7
DCEBIO	Potassium channel activator	-0.7
clomethiazole	GABA receptor antagonist	-0.7
tyrphostin-AG-825	Receptor tyrosine protein kinase inhibitor	-0.7
tenoxicam	Cyclooxygenase inhibitor	-0.7
gabazine	GABA receptor antagonist	-0.7
diazoxide	Potassium channel activator	-0.7
SB-431542	TGF beta receptor inhibitor	-0.67
methylergometrine	Dopamine receptor antagonist	-0.67
ramipril	ACE inhibitor	-0.67
SB-415286	Glycogen synthase kinase inhibitor	-0.65
parecoxib	Cyclooxygenase inhibitor	-0.63
AG-490	EGFR inhibitor	-0.63
PETCM	Caspase activator	-0.63
KIN001-220	Aurora kinase inhibitor	-0.61
tocainide	Sodium channel blocker	-0.61
prostaglandin-b2	cAMP inhibitor	-0.6
ciprofibrate	PPAR receptor agonist	-0.6
rofecoxib	Cyclooxygenase inhibitor	-0.6
dobutamine	Adrenergic receptor agonist	-0.6
depudecin	HDAC inhibitor	-0.6
gemcitabine	Ribonucleotide reductase inhibitor	-0.58
trichostatin-a	HDAC inhibitor	-0.56
benzbromarone	Chloride channel blocker	-0.56
U-18666A	Oxidosqualene cyclase inhibitor	-0.56
PHA-665752	c-Met inhibitor	-0.56
prednicarbate	Phospholipase activator	-0.56
nevirapine	Reverse transcriptase inhibitor	-0.56
DL-PDMP	Glucosyltransferase inhibitor	-0.56
gossypol	BCL inhibitor	-0.56
LE-135	Retinoid receptor agonist	-0.56
cerivastatin	HMGCR inhibitor	-0.54
BMS-536924	IGF-1 inhibitor	-0.53
vinblastine	Microtubule inhibitor	-0.53
pentylenetetrazol	GABA receptor antagonist	-0.53
sulfinpyrazone	Uricosuric blocker	-0.53
terbinafine	Fungal squalene epoxidase inhibitor	-0.53
valdecoxib	Cyclooxygenase inhibitor	-0.53
RO-28-1675	Glucokinase activator	-0.53
pimozide	Dopamine receptor antagonist	-0.53
trimipramine	Norepinephrine reuptake inhibitor	-0.53
GW-1929	PPAR receptor agonist	-0.5
alosetron	Serotonin receptor antagonist	-0.49
diphenhydramine	Histamine receptor antagonist	-0.49
carvedilol	Adrenergic receptor antagonist	-0.49
ormetoprim	Bacterial antifolate	-0.46
LDN-193189	Serine/threonine kinase inhibitor	-0.46
isradipine	Calcium channel blocker	-0.46
BIBX-1382	EGFR inhibitor	-0.46
aliskiren	Antihypertensive	-0.46
cyclopentolate	Acetylcholine receptor antagonist	-0.46
fluoxetine	Selective serotonin reuptake inhibitor (SSRI)	-0.46
REV-5901	Leukotriene receptor antagonist	-0.42
nefopam	Cyclooxygenase inhibitor	-0.42
terfenadine	Histamine receptor antagonist	-0.42
primaquine	Antimalarial	-0.42
guaifenesin	Expectorant	-0.42
CGP-57380	MAP kinase inhibitor	-0.42
PTB1	AMPK activator	-0.42
capsaicin	TRPV agonist	-0.39
ubenimex	Leukotriene inhibitor	-0.39
BRL-15572	Serotonin receptor antagonist	-0.39
erythromycin	NFkB pathway inhibitor	-0.39
deracoxib	Cyclooxygenase inhibitor	-0.39
flavoxate	Acetylcholine receptor antagonist	-0.39
midazolam	Benzodiazepine receptor agonist	-0.38
ethylestrenol	Progesterone receptor agonist	-0.35
xylazine	Adrenergic receptor agonist	-0.35
ML-7	Myosin light chain kinase inhibitor	-0.35
GBR-12783	Dopamine uptake inhibitor	-0.35
formoterol	Adrenergic receptor agonist	-0.35
aniracetam	Glutamate receptor agonist	-0.35
piribedil	Dopamine receptor agonist	-0.35
protriptyline	Tricyclic antidepressant	-0.35
PRE-084	Sigma receptor agonist	-0.35
probenecid	Uricosuric blocker	-0.35
PD-0325901	MEK inhibitor	-0.35
GDC-0879	RAF inhibitor	-0.33
honokiol	AKT inhibitor	-0.32
temsirolimus	MTOR inhibitor	-0.32
serdemetan	MDM inhibitor	-0.32
DUP-697	Cyclooxygenase inhibitor	-0.32
proadifen	Nitric oxide synthase inhibitor	-0.32
molindone	Dopamine receptor antagonist	-0.3
kitasamycin	Protein synthesis inhibitor	-0.28
EMF-bca1-60	caspase inhibitor	-0.28
AG-14361	PARP inhibitor	-0.28
saquinavir	HIV protease inhibitor	-0.28
carpindolol	Adrenergic receptor antagonist	-0.28
JAK3-Inhibitor-II	JAK inhibitor	-0.28
spiperone	Dopamine receptor antagonist	-0.28
diloxanide	Protein synthesis inhibitor	-0.28
alclometasone	Glucocorticoid receptor agonist	-0.28
benzonatate	Local anesthetic	-0.28
disopyramide	Sodium channel blocker	-0.28
minaprine	Serotonin reuptake inhibitor	-0.28
oxcarbazepine	Sodium channel blocker	-0.25
tipifarnib-P2	farnesyltransferase inhibitor	-0.25
isoeugenol	Nitric oxide production inhibitor	-0.25
rosuvastatin	HMGCR inhibitor	-0.25
methyl-2,5-dihydroxycinnamate	EGFR inhibitor	-0.25
nicorandil	Nitric oxide donor	-0.25
apigenin	Casein kinase inhibitor	-0.21
motesanib	KIT inhibitor	-0.21
LFM-A12	EGFR inhibitor	-0.21
piperine	Monoamine oxidase inhibitor	-0.21
fluspirilene	Dopamine receptor antagonist	-0.21
coumarin	Vitamin K antagonist	-0.21
ZSTK-474	PI3K inhibitor	-0.21
decitabine	DNA methyltransferase inhibitor	-0.21
menadione	Mitochondrial DNA polymerase inhibitor	-0.21
vindesine	Tubulin inhibitor	-0.2
taxifolin	Opioid receptor antagonist	-0.19
T-0901317	LXR agonist	-0.18
pyrimethamine	Dihydrofolate reductase inhibitor	-0.18
GR-89696	Opioid receptor agonist	-0.18
thiethylperazine	Dopamine receptor antagonist	-0.18
phentermine	Dopamine uptake inhibitor	-0.18
indirubin	CDK inhibitor	-0.18
tyrphostin-AG-82	EGFR inhibitor	-0.18
tetramisole	Immunostimulant	-0.18
rosiglitazone	Insulin sensitizer	-0.18
BMS-754807	IGF-1 inhibitor	-0.14
ZD-7114	Adrenergic receptor agonist	-0.14
rhamnetin	HDAC inhibitor	-0.14
tosyl-phenylalanyl-chloromethyl-ketone	Chymotrypsin inhibitor	-0.14
sertaconazole	Sterol demethylase inhibitor	-0.14
molsidomine	Guanylyl cyclase activator	-0.14
bisoprolol	Adrenergic receptor antagonist	-0.12
crizotinib	ALK inhibitor	-0.11
disulfiram	Aldehyde dehydrogenase inhibitor	-0.11
nitrendipine	Calcium channel blocker	-0.11
M2-PK-activator	-666	-0.11
SB-225002	CC chemokine receptor antagonist	-0.11
moxonidine	Imidazoline receptor agonist	-0.11
meloxicam	Cyclooxygenase inhibitor	-0.11
bendroflumethiazide	Sodium/potassium/chloride transporter inhibitor	-0.11
fluphenazine	Dopamine receptor antagonist	-0.11
HTMT	Histamine receptor agonist	-0.11
Y-26763	Potassium channel activator	-0.11
sphingosine	Ceramidase inhibitor	-0.09
azathioprine	Dehydrogenase inhibitor	-0.09
levetiracetam	Calcium channel blocker	-0.07
zolmitriptan	Serotonin receptor agonist	-0.07
prostaglandin-a1	HSP inducer	-0.07
pramipexole	Dopamine receptor agonist	-0.07
glipizide	Sulfonylurea	-0.07
FGIN-1-27	Inositol monophosphatase inhibitor	-0.07
nobiletin	MEK inhibitor	-0.05
flecainide	Sodium channel blocker	-0.05
MK-1775	WEE1 kinase inhibitor	-0.05
tripelennamine	Histamine receptor antagonist	-0.04
arcyriaflavin-a	CDK inhibitor	-0.04
EMF-bca1-57	caspase inhibitor	-0.03
irinotecan	Topoisomerase inhibitor	-0.03
L-755507	Adrenergic receptor agonist	-0.03
ketotifen	Histamine receptor agonist	-0.03
flutamide	Androgen receptor antagonist	-0.03
prazosin	Adrenergic receptor antagonist	-0.03
nimodipine	Calcium channel blocker	-0.03
triamterene	Sodium channel blocker	-0.03
raltitrexed	Thymidylate synthase inhibitor	-0.03
WZ-4002	EGFR inhibitor	-0.02
fluperlapine	Serotonin receptor antagonist	-0.02
sertraline	Serotonin receptor antagonist	-0.02
donepezil	Acetylcholinesterase inhibitor	-0.02
bisphenol-a	PPAR receptor antagonist	-0.02
GSK-429286A	Rho associated kinase inhibitor	-0.02
paroxetine	Selective serotonin reuptake inhibitor (SSRI)	-0.02
loperamide	Opioid receptor agonist	-0.02
remacemide	Glutamate receptor antagonist	-0.02
SDM25N	Opioid receptor antagonist	-0.02
PK-11195	Benzodiazepine receptor antagonist	-0.01
vanoxerine	Dopamine uptake inhibitor	-0.01
droperidol	Dopamine receptor antagonist	-0.01
brimonidine	Adrenergic receptor agonist	-0.01

## Sheet: Sheet 9
Mapping statistics of RNAseq experiment
Statistics	12C1-A-1_R1_001	12C1-A-2_R1_001	12C1-A-3_R1_001	12C1-B-1_R1_001	12C1-B-2_R1_001	12C1-B-3_R1_001	12C1-L-1_R1_001	12C1-L-2_R1_001	12C1-L-3_R1_001	12C1-V-1_R1_001	12C1-V-2_R1_001	12C1-V-3_R1_001	C08-A-1_R1_001	C08-A-2_R1_001	C08-A-3_R1_001	C08-B-1_R1_001	C08-B-2_R1_001	C08-B-3_R1_001	C08-L-1_R1_001	C08-L-2_R1_001	C08-L-3_R1_001	C08-V-1_R1_001	C08-V-2_R1_001	C08-V-3_R1_001
Aligned_0_time	44.73%,1552527	44.95%,1548189	44.59%,1144145	54.47%,3344011	49.18%,2641902	53.02%,1852144	42.92%,1207981	42.08%,1576949	43.55%,1666970	45.53%,997646	45.89%,1095749	46.60%,889419	43.40%,1201068	42.77%,1231062	44.01%,1336151	52.52%,2384152	50.27%,2354280	51.91%,2415482	43.08%,865416	43.61%,1203462	43.30%,1014466	43.63%,1105525	41.32%,1255153	45.41%,1233509
Aligned_1_time	45.24%,1570288	44.62%,1537108	44.85%,1150770	39.68%,2435599	42.85%,2301983	42.37%,1480072	46.21%,1300547	46.45%,1740970	46.79%,1790989	45.62%,999581	44.86%,1071172	45.48%,868153	45.88%,1269576	44.59%,1283682	45.54%,1382665	41.62%,1889264	42.29%,1980380	42.11%,1959343	43.56%,875123	44.73%,1234305	45.02%,1054822	46.50%,1178004	46.05%,1398864	45.65%,1239959
Aligned_>1_times	10.03%,348251	10.43%,359219	10.55%,270771	5.85%,359114	7.97%,427939	4.62%,161336	10.87%,305868	11.47%,429885	9.65%,369545	8.84%,193785	9.25%,220853	7.92%,151198	10.71%,296494	12.64%,363846	10.45%,317298	5.86%,266182	7.44%,348404	5.98%,278173	13.36%,268487	11.66%,321721	11.68%,273644	9.87%,250049	12.62%,383363	8.94%,242728
Aligned_concordantly_1_time	90.59%,22967371	90.51%,22576096	90.60%,17018189	87.30%,24692668	85.86%,19029675	88.00%,15195101	91.02%,20522064	90.44%,24176387	90.86%,26503828	91.97%,19217672	91.74%,20639402	92.35%,18133842	91.47%,21882456	91.17%,21557253	90.71%,21289611	87.07%,17899551	86.09%,16700061	87.01%,18364948	91.07%,14812169	91.38%,21276191	91.28%,17823203	91.49%,20643122	90.38%,20163443	91.28%,21117799
Aligned_concordantly_>1_times	2.29%,581337	2.29%,572443	2.29%,429861	1.54%,435072	1.66%,366931	1.42%,245579	2.41%,542323	2.27%,605547	2.32%,675398	2.43%,507433	2.62%,590520	2.50%,490684	2.46%,589309	2.45%,580276	2.52%,591782	1.48%,304978	1.43%,277778	1.50%,317438	2.48%,403454	2.41%,561438	2.41%,470413	2.57%,580166	2.52%,561282	2.58%,596822
Aligned_concordantly_or_discordantly_0_time	6.85%,1735533	6.90%,1722258	6.83%,1282843	10.85%,3069362	12.12%,2685912	10.12%,1746776	6.24%,1407198	7.01%,1873902	6.56%,1913752	5.24%,1095506	5.31%,1193887	4.86%,954385	5.78%,1383569	6.09%,1439295	6.47%,1518057	11.04%,2269799	12.07%,2341532	11.02%,2326499	6.18%,1004513	5.93%,1379744	6.00%,1171466	5.61%,1266789	6.81%,1518690	5.87%,1358098
Aligned_discordantly_1_time	0.27%,68321	0.29%,72615	0.28%,53264	0.31%,89040	0.36%,79920	0.46%,79079	0.34%,75751	0.28%,74948	0.26%,76153	0.36%,74966	0.33%,75076	0.29%,57751	0.29%,68779	0.29%,69560	0.30%,71207	0.40%,83140	0.41%,79219	0.46%,97930	0.27%,44201	0.28%,65953	0.31%,60183	0.32%,72232	0.30%,66929	0.27%,62023
Overall_alignment_rate	96.94%,Na	96.90%,Na	96.95%,Na	94.09%,Na	94.04%,Na	94.64%,Na	97.32%,Na	97.05%,Na	97.14%,Na	97.61%,Na	97.56%,Na	97.74%,Na	97.49%,Na	97.40%,Na	97.15%,Na	94.20%,Na	93.93%,Na	94.28%,Na	97.34%,Na	97.42%,Na	97.40%,Na	97.55%,Na	97.19%,Na	97.33%,Na
Total_pairs	Na,25352562	Na,24943412	Na,18784157	Na,28286142	Na,22162438	Na,17266535	Na,22547336	Na,26730784	Na,29169131	Na,20895577	Na,22498885	Na,19636662	Na,23924113	Na,23646384	Na,23470657	Na,20557468	Na,19398590	Na,21106815	Na,16264337	Na,23283326	Na,19525265	Na,22562309	Na,22310344	Na,23134742
Total_unpaired_reads	Na,3471066	Na,3444516	Na,2565686	Na,6138724	Na,5371824	Na,3493552	Na,2814396	Na,3747804	Na,3827504	Na,2191012	Na,2387774	Na,1908770	Na,2767138	Na,2878590	Na,3036114	Na,4539598	Na,4683064	Na,4652998	Na,2009026	Na,2759488	Na,2342932	Na,2533578	Na,3037380	Na,2716196

[truncated: 8 more sheets: Sheet 10, Sheet 11, Sheet 12, Sheet 13, Sheet 14, Sheet 15, Sheet 16, Sheet 17]
